# Supplementary material for: Palladium-catalyzed phosphorylation of arylsulfonium salts with P(O)H compounds via C–S bond cleavage
Source: Royal Society of Chemistry journal article supplement (doi:10.1039/d2ra04297e), 2022-01-01
Supplement: d2ra04297e1.pdf [file d2ra04297e1.pdf]

*Electronic Supplementary Information (ESI)*

**Palladium-catalyzed phosphorylation of of arylsulfonium salts with  
P(O)H compounds via C-S bond cleavage**

Huijin Liu, Kai Sun, Xiaolan Li, Jie Zhang, Wei Lu, Xuzhong Luo,\* Haiqing Luo\*

*Department of Chemistry & Chemical Engineering, Gannan Normal University,  
Ganzhou341000, China*

*Email: luoxuzhong@hotmail.com; luohq@gnnu.cn*

**Table of Contents**

|                                                                                                                 |    |
|-----------------------------------------------------------------------------------------------------------------|----|
| 1. General information.....                                                                                     | 2  |
| 2. General procedures for the synthesis of arylsulfonium triflates 1r-1w .....                                  | 2  |
| 3. General procedure for palladium-catalyzed phosphonation of arylsulfonium salts<br>with P(O)H compounds ..... | 3  |
| 4. One-pot phosphorylation of aryl sulfide.....                                                                 | 3  |
| 5. Characterization data for the products .....                                                                 | 4  |
| 6. <sup>1</sup> H, <sup>13</sup> C and <sup>31</sup> P NMR spectra of the products.....                         | 12 |
| 7. References.....                                                                                              | 49 |

## 1. General information:

All the palladium-catalyzed phosphonation reactions were carried out in oven-dried glassware sealed with rubber septa under N<sub>2</sub> atmosphere. Column chromatography was performed on silica gel 200 - 300 mesh. All the compounds were known and characterized by <sup>1</sup>H NMR, <sup>13</sup>C NMR and <sup>31</sup>P NMR with 400 MHz Bruker AVANCE spectrometers (400 MHz, 100 MHz and 162 MHz, respectively). Chemical shifts are reported relative to tetramethylsilane (TMS, δ 0.0 ppm) for <sup>1</sup>H NMR and CDCl<sub>3</sub> (δ 77.0 ppm) for <sup>13</sup>C NMR.

**Materials:** Unless otherwise noted, all reagents were purchased energy chemistry, Ouhe and J&K and used without further purification. Solvents were purified according to standard operation procedure. The arylsulfonium salts **1r** to **1q** were prepared in accordance with references.<sup>[1]</sup>

## 2. General procedures for the synthesis of arylsulfonium triflates **1r-w**<sup>[1-2]</sup>.

**GP A** (Arylsulfonium salts **1r** and **1s**)<sup>[1]</sup>: To a stirred solution of methyl(phenyl)sulfane or ethyl(phenyl)sulfane (5.0 mmol) and EtOTf (6.5 mmol) in DCE (2.0 mL) was treated with EtOTf (6.5 mL) at 0 °C. The resulting solution was stirred at 60 °C for 12 h, poured into distilled water (20 mL), and extracted with dichloromethane (3 × 30 mL). The crude product was purified by column chromatography on silica gel using a mixture of dichloromethane/methanol = 10/1 (v/v) as eluents to give the desired arylsulfonium triflates **1r** and **1s**.

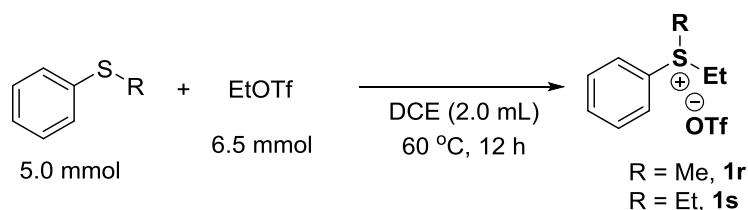

**GP B** (Arylsulfonium salts **1t-w**)<sup>[2]</sup>: To a stirred mixture of diaryl sulfide (3.0 mmol) and alkyl formate (6.0 mmol) was added trifluoromethanesulfonic acid (1.5 mL) at

0 °C. The mixture was warmed to 20 °C for 10 h, poured into distilled water (20 mL), and extracted with dichloromethane (3 × 30 mL). The combined organic layers were dried over anhydrous Na<sub>2</sub>SO<sub>4</sub> and concentrated to dryness under reduced pressure. The crude product was purified by crystallization from dichloromethane/diethyl ether system to give the desired alkyl(diaryl)sulfonium triflates **1t-w**.

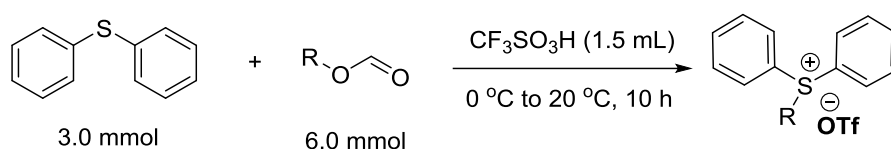

### 3. General procedure for palladium-catalyzed phosphonation of arylsulfonium salts with P(O)H compounds.

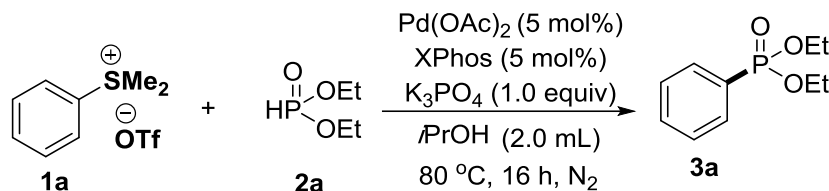

The phosphonation of **1a** to synthesize **3a** (Table 1, entry 22) is representative.

To a 10 mL of a flame-dried seal tube equipped with a magnetic bar were added Pd(PPh<sub>3</sub>)<sub>2</sub>Cl<sub>2</sub> (0.015 mmol, 3.4 mg), XPhos (0.015 mmol, 7.3 mg), [PhSMe<sub>2</sub>][OTf] (**1a**, 0.36 mmol, 103.8 mg) and H<sub>3</sub>PO<sub>4</sub> (0.3 mmol, 63.7 mg). The reaction flask was degassed three times with nitrogen and dry *i*PrOH (2.0 mL) was added using a syringe. Note that the H-phosphonate diester **2a** in a liquid form was added to the reaction tube by syringe after being added in the solvent. The reaction was heated at 80 °C with stirring for 16 h, then cooled to room temperature. After completion of the reaction, the reaction was quenched with water and extracted with EA (25 ml × 3). The organic layers were combined and washed with brine twice. It was dried over anhydrous Na<sub>2</sub>SO<sub>4</sub> and solvent was then removed in vacuo to leave a crude mixture, which is purified by silica gel column chromatography to afford the pure desired product **3a**.

### 4. One-pot phosphonation of aryl sulfide.

A 10 mL of a flame-dried seal tube equipped with a magnetic bar was charged with methyl phenyl sulfide (44.7 mg, 0.40 mmol) and CH<sub>2</sub>Cl<sub>2</sub> (2.0 mL). To this solution, methyl triflate (48 μL, 0.44 mmol) was added, and the resulting mixture was

stirred for 10 h at room temperature. All volatiles were removed under reduced pressure to afford the corresponding sulfonium salt **1a**. To the tube, Pd(PPh<sub>3</sub>)<sub>2</sub>Cl<sub>2</sub> (0.015 mmol, 3.4 mg), XPhos (0.015 mmol, 7.3 mg), and H<sub>3</sub>PO<sub>4</sub> (0.3 mmol, 63.7 mg). The reaction flask was degassed three times with nitrogen and dry *i*PrOH (2.0 mL) was added using a syringe. Note that the H-phosphonate diester **2a** in a liquid form was added to the reaction tube by syringe after being added in the solvent. The reaction was heated at 80 °C with stirring for 16 h, then cooled to room temperature. After completion of the reaction, the reaction was quenched with water and extracted with EA (25 ml × 3). The organic layers were combined and washed with brine twice. It was dried over anhydrous Na<sub>2</sub>SO<sub>4</sub> and solvent was then removed in vacuo to leave a crude mixture, which is purified by silica gel column chromatography to afford the pure desired product **3a**.

## 5. Characterization data for the products.

### Diethyl phenylphosphonate (**3a**).

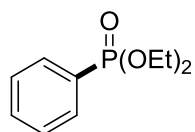

Colorless oil (phenyltriethoxysilane, 38.5 mg, 72 % yield), <sup>1</sup>H NMR (400 MHz, CDCl<sub>3</sub>) δ 7.79 – 7.73 (m, 2H), 7.55 – 7.47 (m, 1H), 7.45 – 7.38 (m, 2H), 4.16 – 3.97 (m, 4H), 1.27 (t, *J* = 7.1 Hz, 6H). <sup>13</sup>C NMR (101 MHz, CDCl<sub>3</sub>) δ 132.3 (d, *J* = 3.0 Hz), 131.6 (d, *J* = 9.9 Hz), 128.4 (d, *J* = 15.0 Hz), 128.2 (d, *J* = 186.8 Hz), 62.0 (d, *J* = 5.4 Hz), 16.2 (d, *J* = 6.5 Hz). <sup>31</sup>P NMR (162 MHz, CDCl<sub>3</sub>) δ 18.82. This compound is known<sup>[3]</sup>.

### Diethyl *p*-tolylphosphonate (**3b**).

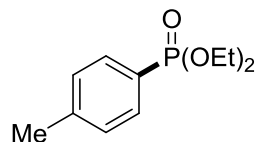

Colorless oil (37.1 mg, 65 % yield): <sup>1</sup>H NMR (400 MHz, CDCl<sub>3</sub>) δ 7.66 (dd, *J* = 13.1, 8.0 Hz, 2H), 7.24 (dt, *J* = 7.8, 4.0 Hz, 2H), 4.23 – 3.91 (m, 4H), 2.36 (s, 3H), 1.27 (t, *J* = 7.1 Hz, 6H). <sup>13</sup>C NMR (101 MHz, CDCl<sub>3</sub>) δ 142.8 (d, *J* = 3.1 Hz), 131.7 (d, *J* = 10.3 Hz), 129.1 (d, *J* = 15.4 Hz), 124.8 (d, *J* = 190.0 Hz), 61.8 (d, *J* = 5.3 Hz), 21.5 (d,

$J = 1.2$  Hz), 16.2 (d,  $J = 6.6$  Hz).  $^{31}\text{P}$  NMR (162 MHz,  $\text{CDCl}_3$ )  $\delta$  19.57. This compound is known<sup>[3]</sup>.

#### Diethyl *m*-tolylphosphonate (3c).

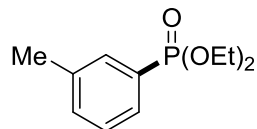

Colorless oil (38.8 mg, 68 % yield):  $^1\text{H}$  NMR (400 MHz,  $\text{CDCl}_3$ )  $\delta$  7.70 – 7.49 (m, 2H), 7.31 (t,  $J = 4.1$  Hz, 2H), 4.22 – 3.93 (m, 4H), 2.35 (s, 3H), 1.28 (t,  $J = 7.1$  Hz, 6H).  $^{13}\text{C}$  NMR (101 MHz,  $\text{CDCl}_3$ )  $\delta$  138.2 (d,  $J = 15.0$  Hz), 133.1 (d,  $J = 3.2$  Hz), 132.1 (d,  $J = 10.0$  Hz), 128.6 (d,  $J = 9.7$  Hz), 128.3 (d,  $J = 15.8$  Hz), 127.9 (d,  $J = 185.7$  Hz), 61.9 (d,  $J = 5.4$  Hz), 21.2, 16.2 (d,  $J = 6.5$  Hz).  $^{31}\text{P}$  NMR (162 MHz,  $\text{CDCl}_3$ )  $\delta$  19.36. This compound is known<sup>[3]</sup>.

#### Diethyl *o*-tolylphosphonate (3d).

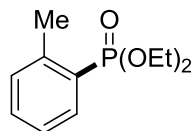

Colorless oil (18.8 mg, 50 % yield):  $^1\text{H}$  NMR (400 MHz,  $\text{CDCl}_3$ )  $\delta$  7.91 (ddd,  $J = 14.4, 7.9, 1.3$  Hz, 1H), 7.42 (dd,  $J = 10.6, 4.5$  Hz, 1H), 7.30 – 7.19 (m, 2H), 4.25 – 3.98 (m, 4H), 2.57 (d,  $J = 1.3$  Hz, 3H), 1.32 (t,  $J = 7.1$  Hz, 6H).  $^{13}\text{C}$  NMR (101 MHz,  $\text{CDCl}_3$ )  $\delta$  141.8 (d,  $J = 10.2$  Hz), 133.9 (d,  $J = 10.3$  Hz), 132.4 (d,  $J = 3.0$  Hz), 131.2 (d,  $J = 14.9$  Hz), 126.7 (d,  $J = 183.8$  Hz), 125.4 (d,  $J = 14.8$  Hz), 61.9 (d,  $J = 5.5$  Hz), 21.2 (d,  $J = 3.6$  Hz), 16.3 (d,  $J = 6.6$  Hz).  $^{31}\text{P}$  NMR (162 MHz,  $\text{CDCl}_3$ )  $\delta$  19.50. This compound is known<sup>[3]</sup>.

#### Diethyl (4-(*tert*-butyl)phenyl)phosphonate (3e).

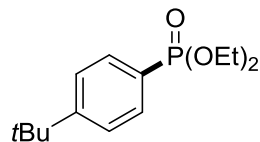

Colorless oil (47.9 mg, 63 % yield):  $^1\text{H}$  NMR (400 MHz,  $\text{CDCl}_3$ )  $\delta$  7.69 (dd,  $J = 13.0, 8.4$  Hz, 2H), 7.49 – 7.32 (m, 2H), 4.27 – 3.95 (m, 4H), 1.49 – 1.08 (m, 15H).  $^{13}\text{C}$  NMR (101 MHz,  $\text{CDCl}_3$ )  $\delta$  155.7 (d,  $J = 3.1$  Hz), 131.5 (d,  $J = 10.3$  Hz), 125.3 (d,  $J = 15.2$  Hz), 124.7 (d,  $J = 189.0$  Hz), 61.8 (d,  $J = 5.3$  Hz), 34.9, 30.9, 16.2 (d,  $J = 6.6$  Hz).  $^{31}\text{P}$  NMR (162 MHz,  $\text{CDCl}_3$ )  $\delta$  19.51. This compound is known<sup>[4]</sup>.

### Diethyl (4-methoxyphenyl)phosphonate (3f)

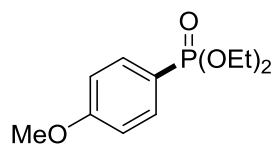

Colorless oil (51.2 mg, 84 % yield):  $^1\text{H NMR}$  (400 MHz,  $\text{CDCl}_3$ )  $\delta$  7.80 – 7.65 (m, 2H), 6.98 – 6.85 (m, 2H), 4.17 – 3.91 (m, 4H), 3.81 (s, 3H), 1.27 (t,  $J = 7.1$  Hz, 6H).  $^{13}\text{C NMR}$  (101 MHz,  $\text{CDCl}_3$ )  $\delta$  162.8 (d,  $J = 3.4$  Hz), 133.7 (d,  $J = 11.4$  Hz), 119.3 (d,  $J = 194.9$  Hz), 113.9 (d,  $J = 16.0$  Hz), 61.8 (d,  $J = 5.3$  Hz), 55.2, 16.2 (d,  $J = 6.6$  Hz).  $^{31}\text{P NMR}$  (162 MHz,  $\text{CDCl}_3$ )  $\delta$  19.77. This compound is known<sup>[3]</sup>.

### diethyl (4-(3-chloropropoxy)phenyl)phosphonate (3g).

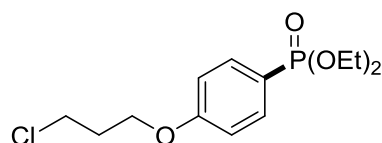

Colorless oil (66 % yield):  $^1\text{H NMR}$  (400 MHz,  $\text{CDCl}_3$ )  $\delta$  7.80 – 7.63 (m, 2H), 7.02 – 6.90 (m, 2H), 4.13 (t,  $J = 5.7$  Hz, 2H), 4.11 – 3.96 (m, 4H), 3.72 (t,  $J = 6.3$  Hz, 2H), 2.22 (p,  $J = 6.0$  Hz, 2H), 1.28 (t,  $J = 7.1$  Hz, 6H).  $^{13}\text{C NMR}$  (101 MHz,  $\text{CDCl}_3$ )  $\delta$  161.9 (d,  $J = 3.4$  Hz), 133.7 (d,  $J = 11.3$  Hz), 119.6 (d,  $J = 194.7$  Hz), 114.4 (d,  $J = 16.0$  Hz), 64.2, 61.8 (d,  $J = 5.3$  Hz), 41.2, 31.9, 16.2 (d,  $J = 6.6$  Hz).  $^{31}\text{P NMR}$  (162 MHz,  $\text{CDCl}_3$ )  $\delta$  19.62. **HRMS (ESI) m/z:**  $[\text{M}+\text{K}]^+$  Calcd for  $\text{C}_{13}\text{H}_{20}\text{ClO}_4\text{PK}^+$  345.0419; found 345.0396.

### diethyl (4-(4-bromobutoxy)phenyl)phosphonate (3h).

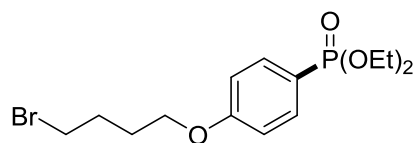

Colorless oil (68 % yield):  $^1\text{H NMR}$  (400 MHz,  $\text{CDCl}_3$ )  $\delta$  7.78 – 7.63 (m, 2H), 6.97 – 6.87 (m, 2H), 4.08 (ddd,  $J = 14.5, 7.2, 2.8$  Hz, 2H), 4.02 – 3.96 (m, 4H), 3.45 (t,  $J = 6.5$  Hz, 2H), 2.08 – 1.98 (m, 2H), 1.97 – 1.88 (m, 2H), 1.27 (t,  $J = 7.1$  Hz, 6H).  $^{13}\text{C NMR}$  (101 MHz,  $\text{CDCl}_3$ )  $\delta$  162.0 (d,  $J = 3.4$  Hz), 133.7 (d,  $J = 11.3$  Hz), 119.4 (d,  $J = 194.9$  Hz), 114.3 (d,  $J = 16.0$  Hz), 66.8, 61.8 (d,  $J = 5.3$  Hz), 33.2, 29.2, 27.6, 16.2 (d,  $J = 6.6$  Hz).  $^{31}\text{P NMR}$  (162 MHz,  $\text{CDCl}_3$ )  $\delta$  19.69. **HRMS (ESI) m/z:**  $[\text{M}+\text{H}]^+$  Calcd for  $\text{C}_{14}\text{H}_{23}\text{BrO}_4\text{P}^+$  365.0512; found 365.0492.

### diethyl (4-hydroxyphenyl)phosphonate (3-3i).

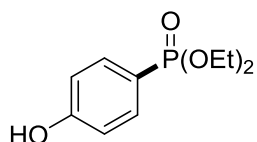

Colorless oil (67 % yield):  $^1\text{H NMR}$  (400 MHz,  $\text{CDCl}_3$ )  $\delta$  9.95 (s, 1H), 7.65-7.60 (m, 2H), 7.08 – 6.92 (m, 2H), 4.23 – 3.91 (m, 4H), 1.30 (t,  $J = 7.1$  Hz, 6H).  $^{13}\text{C NMR}$  (101 MHz,  $\text{CDCl}_3$ )  $\delta$  161.8 (d,  $J = 3.3$  Hz), 133.7 (d,  $J = 11.7$  Hz), 116.1 (d,  $J = 196.2$  Hz), 116.0 (d,  $J = 16.4$  Hz), 62.3 (d,  $J = 5.4$  Hz), 16.2 (d,  $J = 6.6$  Hz).  $^{31}\text{P NMR}$  (162 MHz,  $\text{CDCl}_3$ )  $\delta$  21.10. This compound is known<sup>[5]</sup>.

#### Diethyl (4-fluorophenyl)phosphonate (3j).

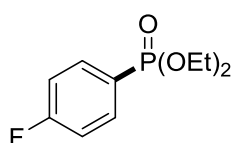

Colorless oil (37.2 mg, 64 % yield):  $^1\text{H NMR}$  (400 MHz,  $\text{CDCl}_3$ )  $\delta$  7.87 – 7.71 (m, 2H), 7.11 (td,  $J = 8.7, 3.1$  Hz, 2H), 4.26 – 3.92 (m, 4H), 1.28 (t,  $J = 7.1$  Hz, 6H).  $^{13}\text{C NMR}$  (101 MHz,  $\text{CDCl}_3$ )  $\delta$  165.2 (dd,  $J = 253.5, 3.9$  Hz), 134.3 (dd,  $J = 11.3, 8.9$  Hz), 124.3 (dd,  $J = 192.7, 3.4$  Hz), 115.7 (dd,  $J = 21.4, 16.3$  Hz), 62.1 (d,  $J = 5.4$  Hz), 16.2 (d,  $J = 6.5$  Hz).  $^{31}\text{P NMR}$  (162 MHz,  $\text{CDCl}_3$ )  $\delta$  17.84. This compound is known<sup>[3]</sup>.

#### Diethyl (4-(trifluoromethyl)phenyl)phosphonate (3k).

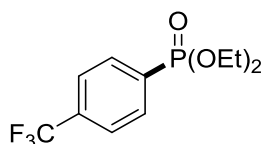

Colorless oil (49.5 mg, 70 % yield):  $^1\text{H NMR}$  (400 MHz,  $\text{CDCl}_3$ )  $\delta$  7.91 (dd,  $J = 13.0, 8.0$  Hz, 2H), 7.68 (dd,  $J = 8.1, 3.5$  Hz, 2H), 4.23 – 3.96 (m, 4H), 1.29 (t,  $J = 7.1$  Hz, 6H).  $^{13}\text{C NMR}$  (101 MHz,  $\text{CDCl}_3$ )  $\delta$  133.9 (dd,  $J = 32.7, 3.3$  Hz), 132.7 (d,  $J = 185.7$  Hz), 132.1 (d,  $J = 10.2$  Hz), 125.2 (dq,  $J = 15.1, 3.7$  Hz), 123.4 (d,  $J = 272.7$  Hz), 62.4 (d,  $J = 5.5$  Hz), 16.2 (d,  $J = 6.4$  Hz).  $^{31}\text{P NMR}$  (162 MHz,  $\text{CDCl}_3$ )  $\delta$  16.29. This compound is known<sup>[3]</sup>.

#### diethyl (4-acetylphenyl)phosphonate (3l).

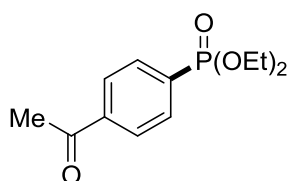

Colorless oil (46 % yield):  $^1\text{H NMR}$  (400 MHz,  $\text{CDCl}_3$ )  $\delta$  8.08 – 7.94 (m, 2H), 7.90-7.85 (m, 2H), 4.22 – 3.97 (m, 4H), 2.60 (s, 3H), 1.29 (t,  $J = 7.1$  Hz, 6H).  $^{13}\text{C NMR}$  (101 MHz,  $\text{CDCl}_3$ )  $\delta$  197.4, 139.7 (d,  $J = 3.2$  Hz), 133.2 (d,  $J = 186.5$  Hz), 132.0 (d,  $J = 10.0$  Hz), 128.0 (d,  $J = 15.1$  Hz), 62.3 (d,  $J = 5.5$  Hz), 26.7, 16.2 (d,  $J = 6.4$  Hz).  $^{31}\text{P NMR}$  (162 MHz,  $\text{CDCl}_3$ )  $\delta$  16.87. This compound is known<sup>[5]</sup>.

**methyl 4-(diethoxyphosphoryl)benzoate (3m).**

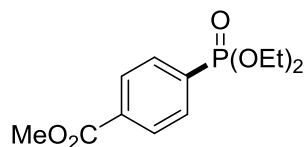

Colorless oil (57 % yield):  $^1\text{H NMR}$  (400 MHz,  $\text{CDCl}_3$ )  $\delta$  8.10-8.07 (m, 2H), 7.92 – 7.77 (m, 2H), 4.21 – 3.98 (m, 4H), 3.91 (s, 3H), 1.29 (t,  $J = 7.1$  Hz, 6H).  $^{13}\text{C NMR}$  (101 MHz,  $\text{CDCl}_3$ )  $\delta$  166.1, 133.4 (d,  $J = 3.3$  Hz), 133.1 (d,  $J = 185.3$  Hz), 131.7 (d,  $J = 10.1$  Hz), 129.3 (d,  $J = 15.0$  Hz), 62.3 (d,  $J = 5.5$  Hz), 52.4, 16.2 (d,  $J = 6.4$  Hz).  $^{31}\text{P NMR}$  (162 MHz,  $\text{CDCl}_3$ )  $\delta$  17.02. This compound is known<sup>[6]</sup>.

**4-(diethoxyphosphoryl)phenyl pivalate (3n).**

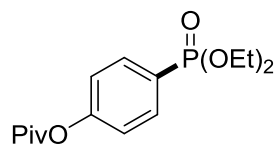

Colorless oil (70 % yield):  $^1\text{H NMR}$  (400 MHz,  $\text{CDCl}_3$ )  $\delta$  7.87 – 7.74 (m, 2H), 7.18 – 7.06 (m, 2H), 4.21 – 3.94 (m, 4H), 1.32 (s, 9H), 1.28 (t,  $J = 7.1$  Hz, 6H).  $^{13}\text{C NMR}$  (101 MHz,  $\text{CDCl}_3$ )  $\delta$  176.4, 154.3 (d,  $J = 3.8$  Hz), 133.3 (d,  $J = 11.0$  Hz), 125.5 (d,  $J = 190.9$  Hz), 121.7 (d,  $J = 15.9$  Hz), 62.1 (d,  $J = 5.4$  Hz), 39.1, 26.9, 16.2 (d,  $J = 6.5$  Hz).  $^{31}\text{P NMR}$  (162 MHz,  $\text{CDCl}_3$ )  $\delta$  18.06. **HRMS (ESI) m/z:**  $[\text{M}+\text{K}]^+$  Calcd for  $\text{C}_{15}\text{H}_{23}\text{O}_5\text{PK}^+$  353.0915; found 353.0892.

**4-(diethoxyphosphoryl)phenyl 4-methylbenzenesulfonate (3o).**

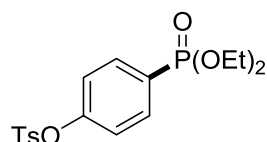

Colorless oil (66 % yield):  $^1\text{H NMR}$  (400 MHz,  $\text{CDCl}_3$ )  $\delta$  7.76 – 7.70 (m, 2H), 7.69-7.66 (m, 2H), 7.30-7.28 (m, 2H), 7.11 – 7.00 (m, 2H), 4.19 – 3.96 (m, 4H), 2.42 (s, 3H), 1.28 (t,  $J = 7.1$  Hz, 6H).  $^{13}\text{C NMR}$  (101 MHz,  $\text{CDCl}_3$ )  $\delta$  152.4 (d,  $J = 4.0$  Hz),



145.7, 133.4 (d,  $J = 11.0$  Hz), 131.9, 129.8, 128.4, 126.5, 122.4 (d,  $J = 15.9$  Hz), 62.3 (d,  $J = 5.6$  Hz), 21.6, 16.2 (d,  $J = 6.4$  Hz).  $^{31}\text{P}$  NMR (162 MHz,  $\text{CDCl}_3$ )  $\delta$  17.12. This compound is known<sup>[6]</sup>.

#### diethyl (4-acetamidophenyl)phosphonate (3p).

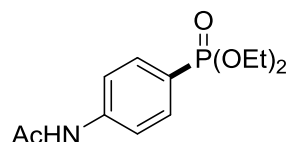

White solid (50 % yield):  $^1\text{H}$  NMR (400 MHz,  $\text{CDCl}_3$ )  $\delta$  9.26 (s, 1H), 7.71 (dd,  $J = 9.6, 5.2$  Hz, 3H), 7.65 (d,  $J = 8.6$  Hz, 1H), 4.12 – 3.97 (m, 4H), 2.17 (s, 3H), 1.28 (t,  $J = 7.1$  Hz, 6H).  $^{13}\text{C}$  NMR (101 MHz,  $\text{CDCl}_3$ )  $\delta$  169.5, 142.7 (d,  $J = 3.4$  Hz), 132.6 (d,  $J = 10.8$  Hz), 121.8 (d,  $J = 193.3$  Hz), 119.2 (d,  $J = 15.3$  Hz), 62.2 (d,  $J = 5.5$  Hz), 24.4, 16.2 (d,  $J = 6.6$  Hz).  $^{31}\text{P}$  NMR (162 MHz,  $\text{CDCl}_3$ )  $\delta$  18.91. This compound is known<sup>[6]</sup>.

#### diethyl naphthalen-2-ylphosphonate (3q).

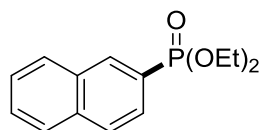

Colorless oil (70 % yield):  $^1\text{H}$  NMR (400 MHz,  $\text{CDCl}_3$ )  $\delta$  8.42 (d,  $J = 15.5$  Hz, 1H), 7.90 (dd,  $J = 11.2, 6.6$  Hz, 2H), 7.85 (d,  $J = 7.9$  Hz, 1H), 7.78 – 7.71 (m, 1H), 7.61 – 7.50 (m, 2H), 4.35 – 3.88 (m, 4H), 1.32 (t,  $J = 7.1$  Hz, 6H).  $^{13}\text{C}$  NMR (101 MHz,  $\text{CDCl}_3$ )  $\delta$  134.9 (d,  $J = 2.7$  Hz), 134.0 (d,  $J = 10.2$  Hz), 132.2 (d,  $J = 16.7$  Hz), 128.8, 128.3 (d,  $J = 14.3$  Hz), 128.2, 127.7, 126.8 (d,  $J = 1.0$  Hz), 126.3 (d,  $J = 9.8$  Hz), 125.2 (d,  $J = 187.9$  Hz), 62.1 (d,  $J = 5.3$  Hz), 16.3 (d,  $J = 6.5$  Hz).  $^{31}\text{P}$  NMR (162 MHz,  $\text{CDCl}_3$ )  $\delta$  19.17. This compound is known<sup>[3]</sup>.

#### Dimethyl phenylphosphonate (4a).

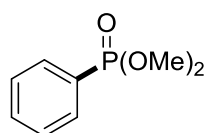

Colorless oil (53.1 mg, 95 % yield):  $^1\text{H}$  NMR (400 MHz,  $\text{CDCl}_3$ )  $\delta$  7.86 – 7.71 (m, 2H), 7.56-7.52 (m, 1H), 7.47-7.42 (m, 2H), 3.72 (d,  $J = 11.1$  Hz, 6H).  $^{13}\text{C}$  NMR (101 MHz,  $\text{CDCl}_3$ )  $\delta$  132.6 (d,  $J = 3.0$  Hz), 131.8 (d,  $J = 9.9$  Hz), 128.5 (d,  $J = 15.1$  Hz),

126.7 (d,  $J = 188.6$  Hz), 52.6 (d,  $J = 5.5$  Hz).  $^{31}\text{P}$  NMR (162 MHz,  $\text{CDCl}_3$ )  $\delta$  21.66. This compound is known<sup>[3]</sup>.

#### Diisopropyl phenylphosphonate (4b).

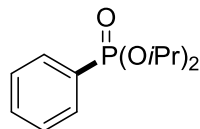

Colorless oil (34.2 mg, 47 % yield):  $^1\text{H}$  NMR (400 MHz,  $\text{CDCl}_3$ )  $\delta$  7.81-7.76 (m, 2H), 7.51-7.47 (m, 1H), 7.44-7.39 (m, 2H), 4.65 (dq,  $J = 18.8, 6.2$  Hz, 2H), 1.32 (dd,  $J = 9.5, 4.4$  Hz, 6H), 1.19 (d,  $J = 6.2$  Hz, 6H).  $^{13}\text{C}$  NMR (101 MHz,  $\text{CDCl}_3$ )  $\delta$  132.0 (d,  $J = 3.0$  Hz), 131.6 (d,  $J = 9.8$  Hz), 129.8 (d,  $J = 188.4$  Hz), 128.2 (d,  $J = 15.0$  Hz), 70.6 (d,  $J = 5.5$  Hz), 24.0 (d,  $J = 4.0$  Hz), 23.7 (d,  $J = 4.8$  Hz).  $^{31}\text{P}$  NMR (162 MHz,  $\text{CDCl}_3$ )  $\delta$  16.69. This compound is known<sup>[3]</sup>.

#### dibenzyl phenylphosphonate (4c).

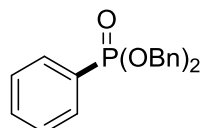

Colorless oil (65.1 mg, 64 % yield):  $^1\text{H}$  NMR (400 MHz,  $\text{CDCl}_3$ )  $\delta$  7.82 (ddd,  $J = 13.5, 8.2, 1.4$  Hz, 2H), 7.55 (td,  $J = 7.4, 1.5$  Hz, 1H), 7.44 (ddd,  $J = 8.5, 6.9, 4.3$  Hz, 2H), 7.35 – 7.29 (m, 10H), 5.20 – 4.93 (m, 4H).  $^{13}\text{C}$  NMR (101 MHz,  $\text{CDCl}_3$ )  $\delta$  136.1 (d,  $J_{\text{C-P}} = 6.8$  Hz), 132.5 (d,  $J_{\text{C-P}} = 3.1$  Hz), 131.8 (d,  $J_{\text{C-P}} = 10.0$  Hz), 128.5, 128.5, 128.4, 128.3, 127.8, 67.6.  $^{31}\text{P}$  NMR (162 MHz,  $\text{CDCl}_3$ )  $\delta$  19.7. This compound is known<sup>[3]</sup>.

#### ethyl diphenylphosphinate (4d).

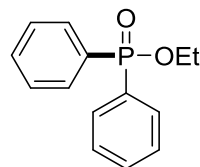

Colorless oil (60.7 mg, 82 % yield):  $^1\text{H}$  NMR (400 MHz,  $\text{CDCl}_3$ )  $\delta$  7.87 – 7.78 (m, 4H), 7.54 – 7.47 (m, 2H), 7.44 (tdd,  $J = 8.2, 3.4, 1.3$  Hz, 4H), 4.10 (p,  $J = 7.1$  Hz, 2H), 1.36 (t,  $J = 7.0$  Hz, 3H).  $^{13}\text{C}$  NMR (101 MHz,  $\text{CDCl}_3$ )  $\delta$  132.0 (d,  $J = 2.7$  Hz), 131.5 (d,  $J = 136.2$  Hz), 131.5 (d,  $J = 10.1$  Hz), 128.4 (d,  $J = 13.1$  Hz), 61.0 (d,  $J = 5.9$  Hz), 16.4 (d,  $J = 6.7$  Hz).  $^{31}\text{P}$  NMR (162 MHz,  $\text{CDCl}_3$ )  $\delta$  31.39. This compound is known<sup>[7]</sup>.

**triphenylphosphine oxide (4e).**

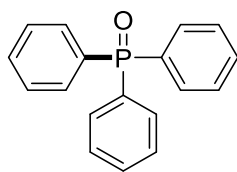

White solid (19.2 mg, 23% yield):  $^1\text{H NMR}$  (400 MHz,  $\text{CDCl}_3$ )  $\delta$  7.72 – 7.61 (m, 6H), 7.55-7.51 (m, 3H), 7.47-7.42 (m, 6H).  $^{13}\text{C NMR}$  (101 MHz,  $\text{CDCl}_3$ )  $\delta$  132.95, 132.03 (d,  $J = 9.9$  Hz), 131.89 (d,  $J = 2.8$  Hz), 128.45 (d,  $J = 12.1$  Hz).  $^{31}\text{P NMR}$  (162 MHz,  $\text{CDCl}_3$ )  $\delta$  29.25. This compound is known<sup>[7]</sup>.

**phenyldi-*p*-tolylphosphine oxide (4f).**

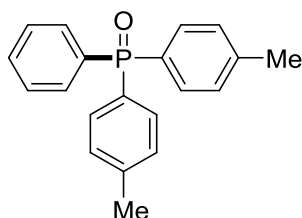

Colorless oil (58.8 mg, 64% yield):  $^1\text{H NMR}$  (400 MHz,  $\text{CDCl}_3$ )  $\delta$  7.69 – 7.61 (m, 2H), 7.58 – 7.48 (m, 5H), 7.43 (ddd,  $J = 8.4, 6.6, 2.9$  Hz, 2H), 7.28 – 7.21 (m, 4H), 2.38 (s, 6H).  $^{13}\text{C NMR}$  (101 MHz,  $\text{CDCl}_3$ )  $\delta$  142.3 (d,  $J_{\text{C-P}} = 2.9$  Hz), 132.5, 132.0 (d,  $J_{\text{C-P}} = 10.3$  Hz), 132.0 (d,  $J_{\text{C-P}} = 9.9$  Hz), 131.7 (d,  $J_{\text{C-P}} = 2.8$  Hz), 129.4 (d,  $J_{\text{C-P}} = 106.4$  Hz), 129.2 (d,  $J_{\text{C-P}} = 12.5$  Hz), 128.3 (d,  $J_{\text{C-P}} = 12.1$  Hz), 21.6.  $^{31}\text{P NMR}$  (162 MHz,  $\text{CDCl}_3$ )  $\delta$  29.4. This compound is known<sup>[7]</sup>.

**tetraethyl 1,4-phenylenebis(phosphonate) (5).**

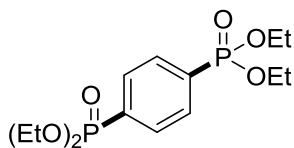

Colorless oil (23.1 mg, 22 % yield):  $^1\text{H NMR}$  (400 MHz,  $\text{CDCl}_3$ )  $\delta$  8.10 – 7.76 (m, 4H), 4.36 – 3.88 (m, 8H), 1.33 (t,  $J = 7.1$  Hz, 12H).  $^{13}\text{C NMR}$  (101 MHz,  $\text{CDCl}_3$ )  $\delta$  132.9 (dd,  $J = 186.9, 3.1$  Hz), 131.75 – 131.37 (m), 62.5 (d,  $J = 5.6$  Hz), 16.3 (d,  $J = 6.4$  Hz).  $^{31}\text{P NMR}$  (162 MHz,  $\text{CDCl}_3$ )  $\delta$  16.84. This compound is known<sup>[8]</sup>.

**diethyl (4-(methylthio)phenyl)phosphonate (6).**

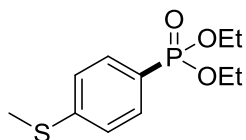

Yellow oil (27.3 mg, 35 % yield):  $^1\text{H NMR}$  (400 MHz,  $\text{CDCl}_3$ )  $\delta$  7.76 – 7.55 (m, 2H), 7.38 – 7.11 (m, 2H), 4.21 – 3.96 (m, 4H), 2.48 (s, 3H), 1.29 (dd,  $J = 8.9, 5.3$  Hz, 6H).  $^{13}\text{C NMR}$  (101 MHz,  $\text{CDCl}_3$ )  $\delta$  144.8 (d,  $J = 3.5$  Hz), 132.0 (d,  $J = 10.6$  Hz), 125.0 (d,  $J = 15.4$  Hz), 123.6 (d,  $J = 192.1$  Hz), 62.0 (d,  $J = 5.3$  Hz), 16.2 (d,  $J = 6.6$  Hz), 14.6 (s).  $^{31}\text{P NMR}$  (162 MHz,  $\text{CDCl}_3$ )  $\delta$  19.12. This compound is known <sup>[5]</sup>.

5.  $^1\text{H}$ ,  $^{13}\text{C}$  and  $^{31}\text{P}$  NMR spectra of the products.

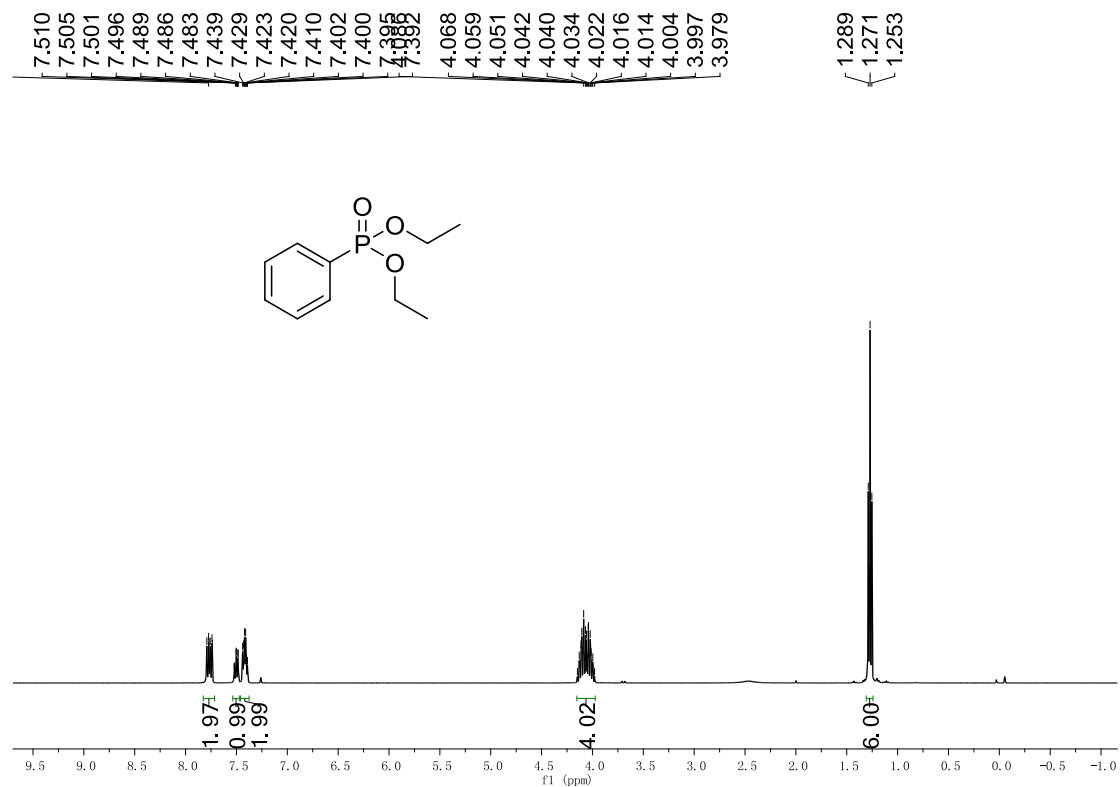

$^1\text{H}$  NMR of 3a

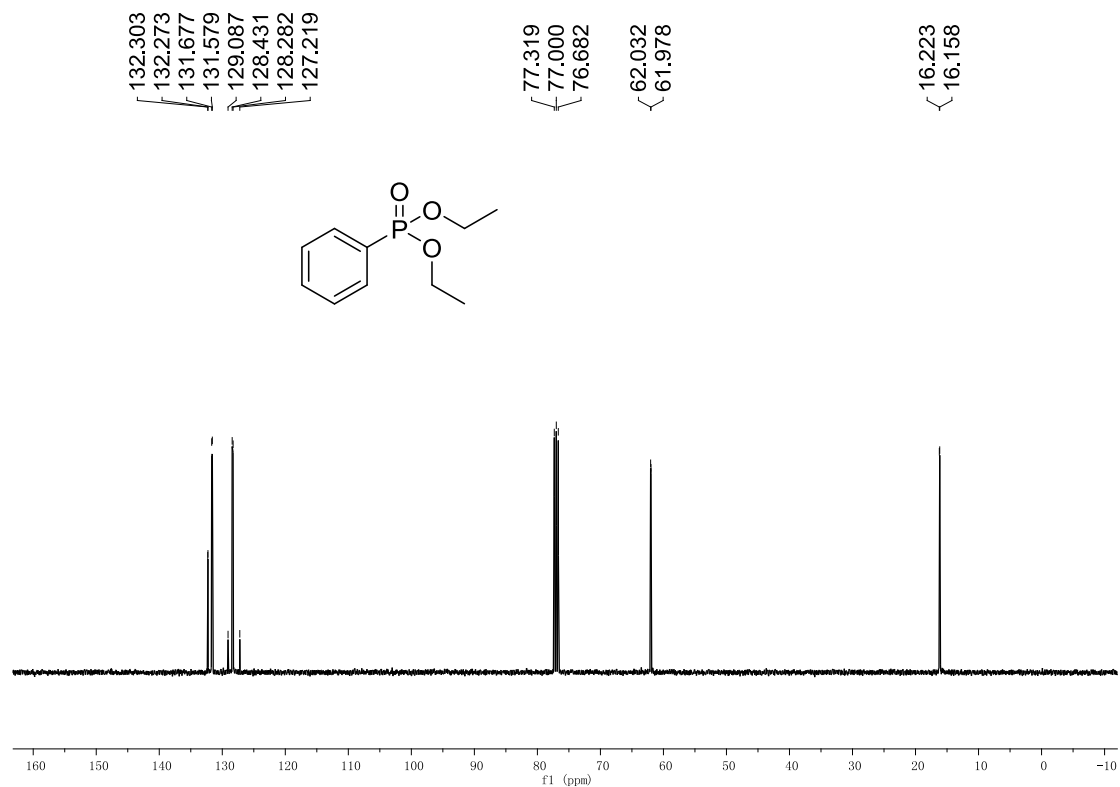

$^{13}\text{C}$  NMR of 3a

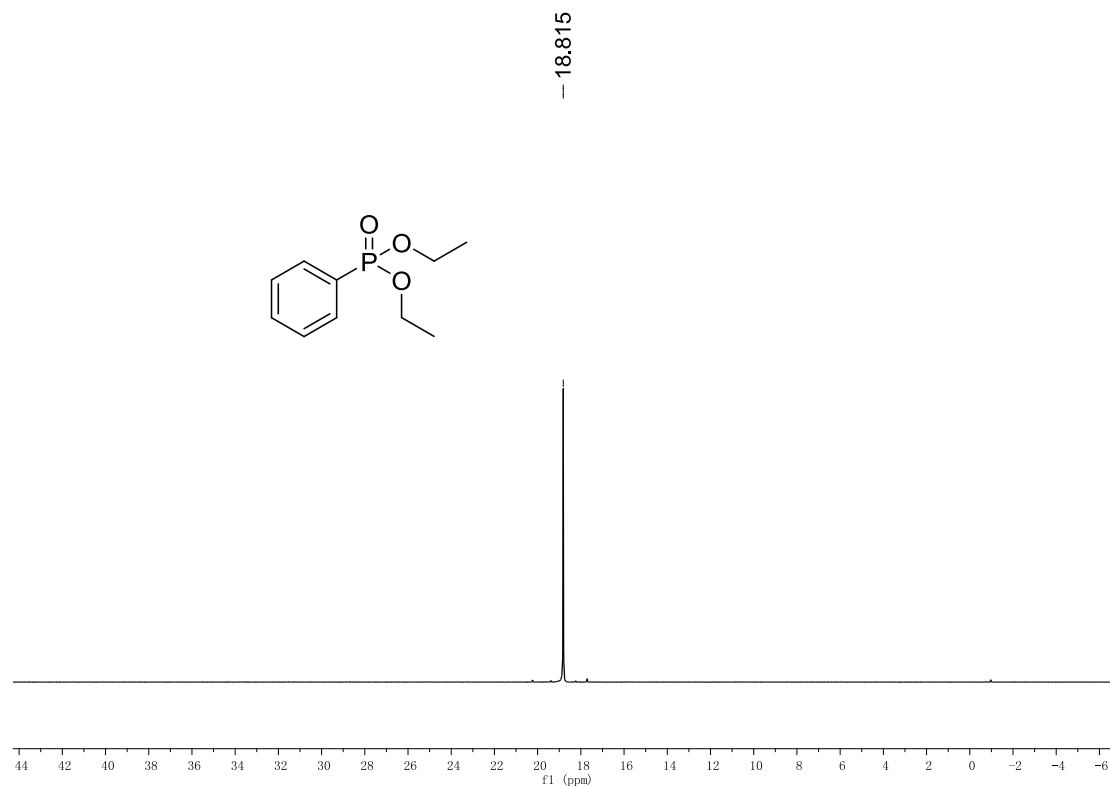

$^{31}\text{P}$  NMR of 3a

7.691  
7.671  
7.658  
7.638  
7.260  
7.250  
7.240  
7.231  
7.221  
4.078  
4.048  
4.043  
4.029  
4.022  
4.011  
4.003  
3.993  
3.985  
3.967  
- 2.361  
1.291  
1.273  
1.256

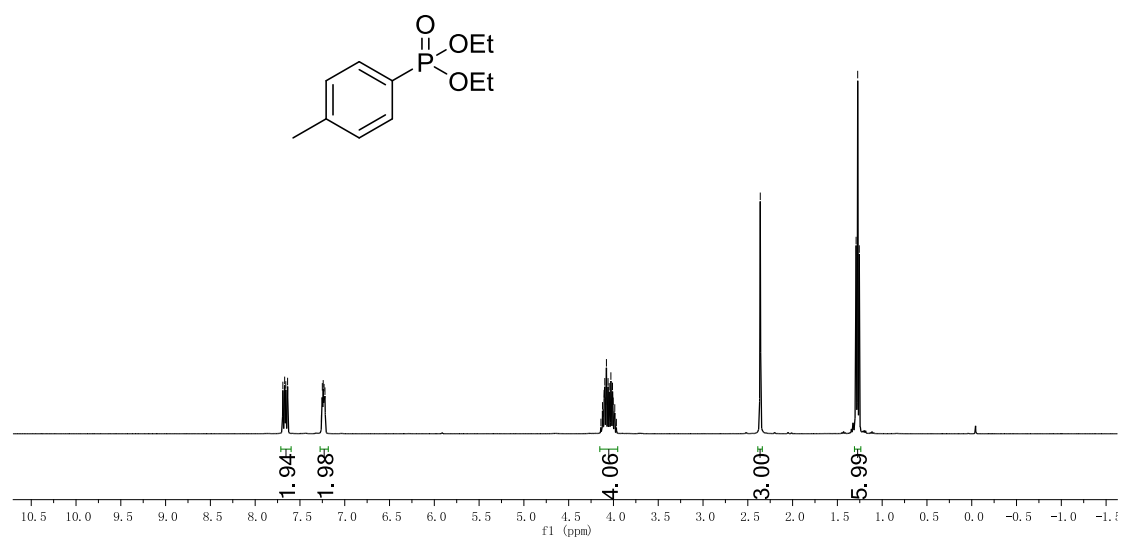

$^1\text{H}$  NMR of 3b

142.842  
142.811  
131.761  
131.659  
129.173  
129.020  
125.779  
123.891

77.319  
77.000  
76.682

61.861  
61.808

21.543  
21.531  
16.239  
16.173

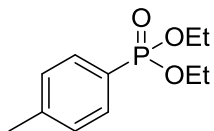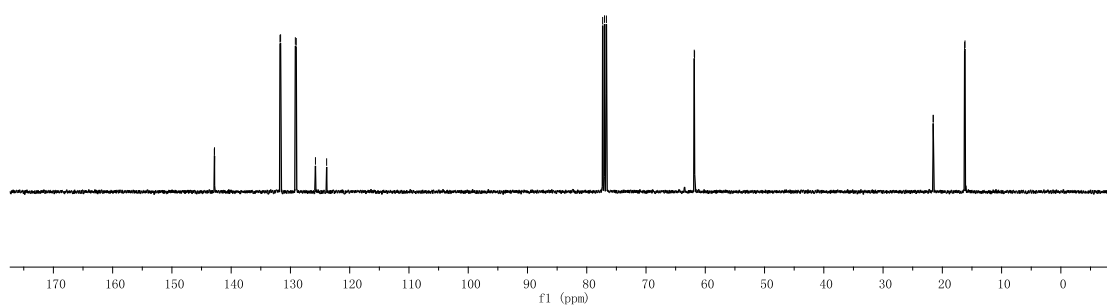

<sup>13</sup>C NMR of 3b

19.570

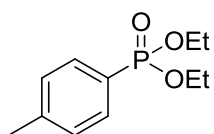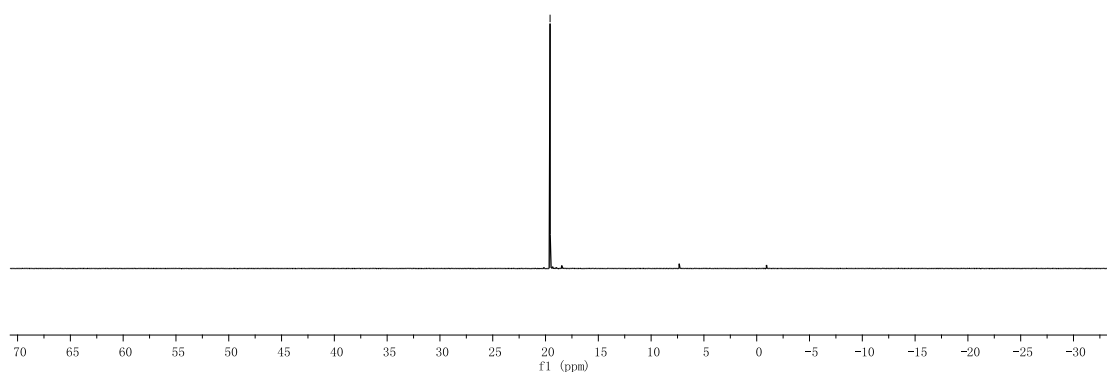

<sup>31</sup>P NMR of 3b

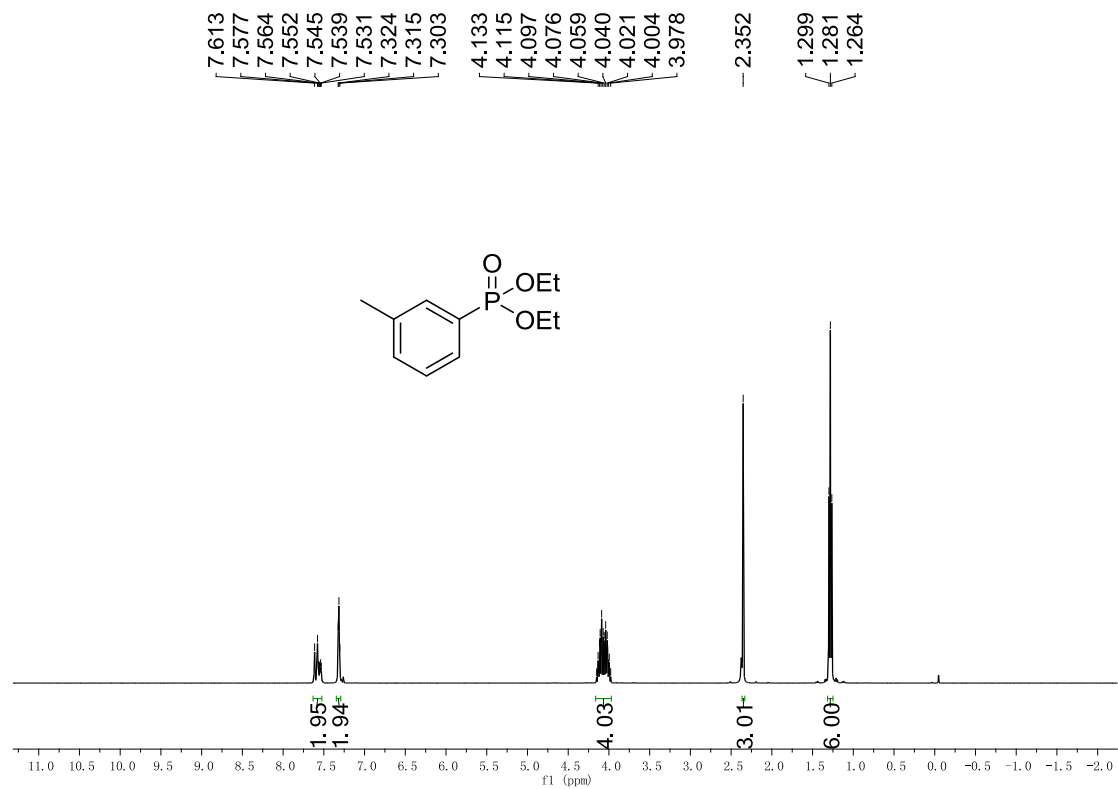

<sup>1</sup>H NMR of **3c**

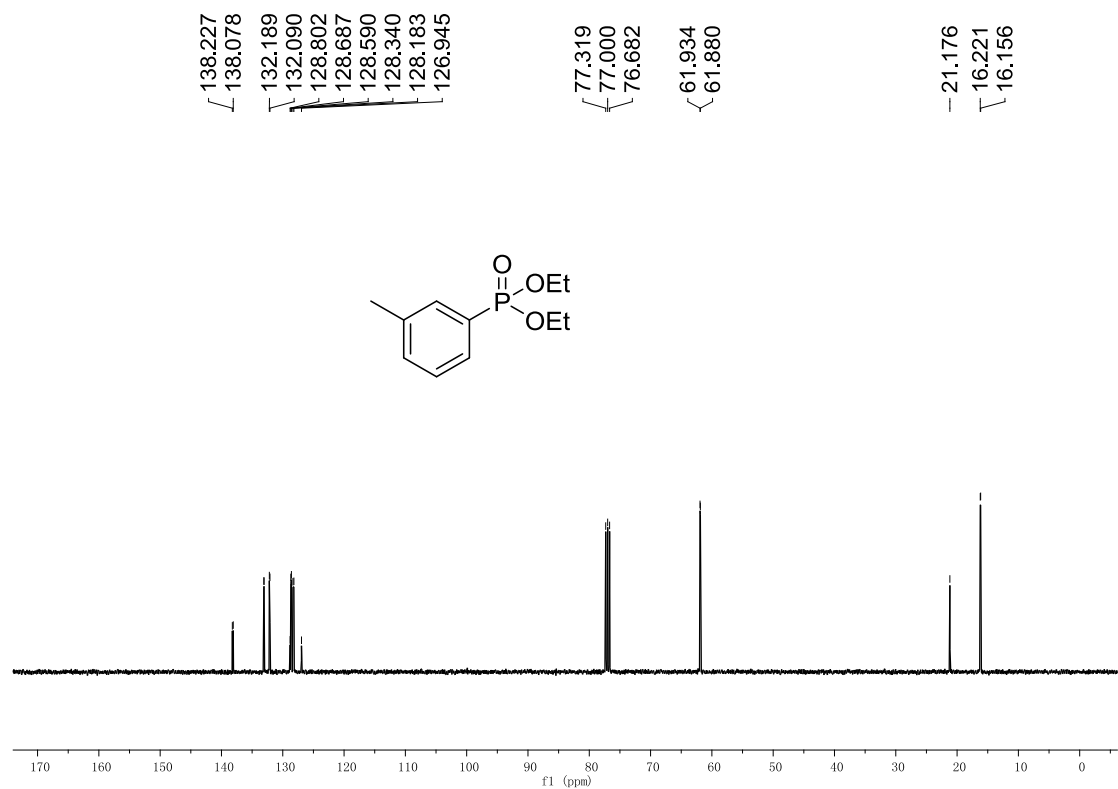

<sup>13</sup>C NMR of **3c**



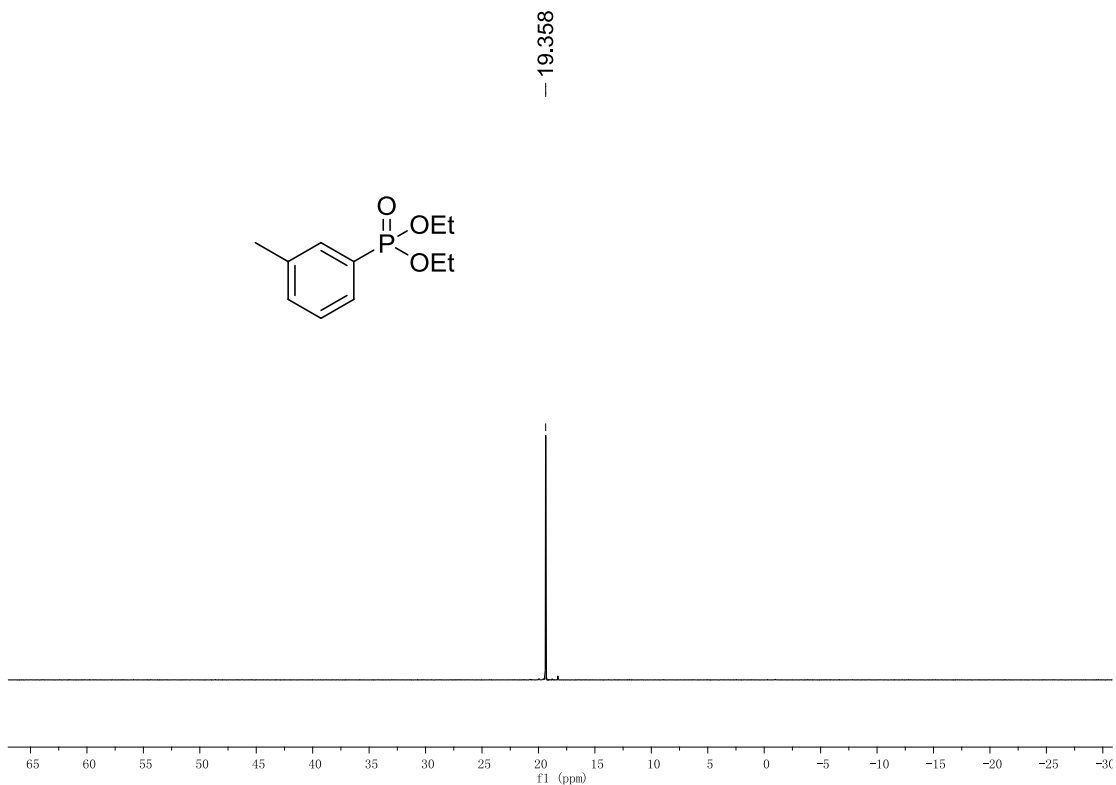

<sup>31</sup>P NMR of 3c

7.936  
7.932  
7.916  
7.913  
7.900  
7.896  
7.880  
7.877  
7.424  
7.405  
7.280  
7.269  
7.260  
7.252  
4.279  
4.161  
4.143  
4.125  
4.107  
4.089  
4.082  
4.064  
4.052  
4.026  
2.572  
2.568  
1.341  
1.323  
1.306

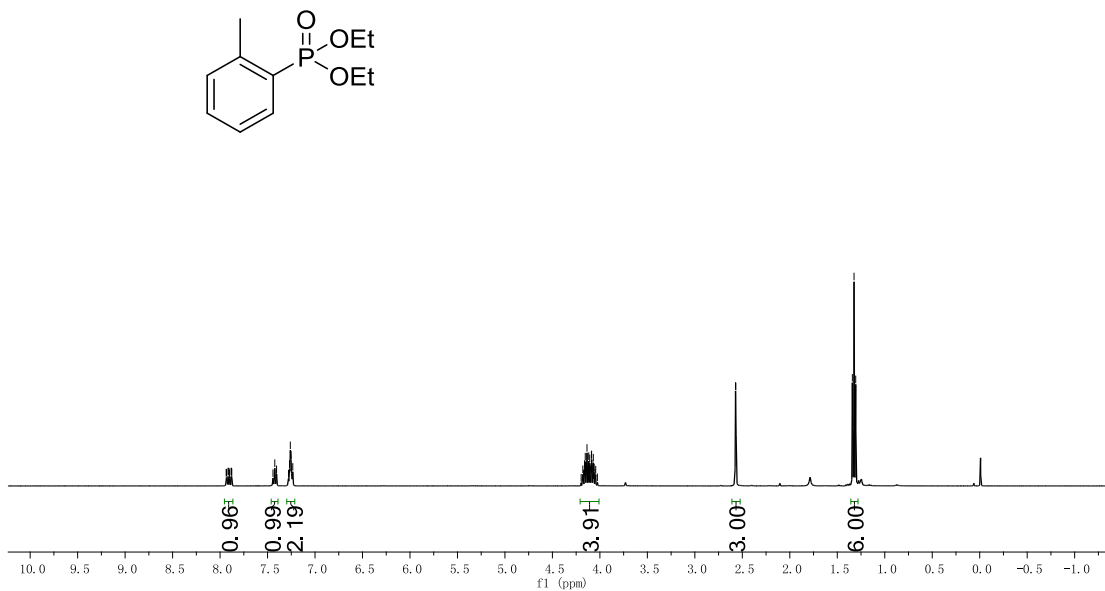

<sup>1</sup>H NMR of 3d

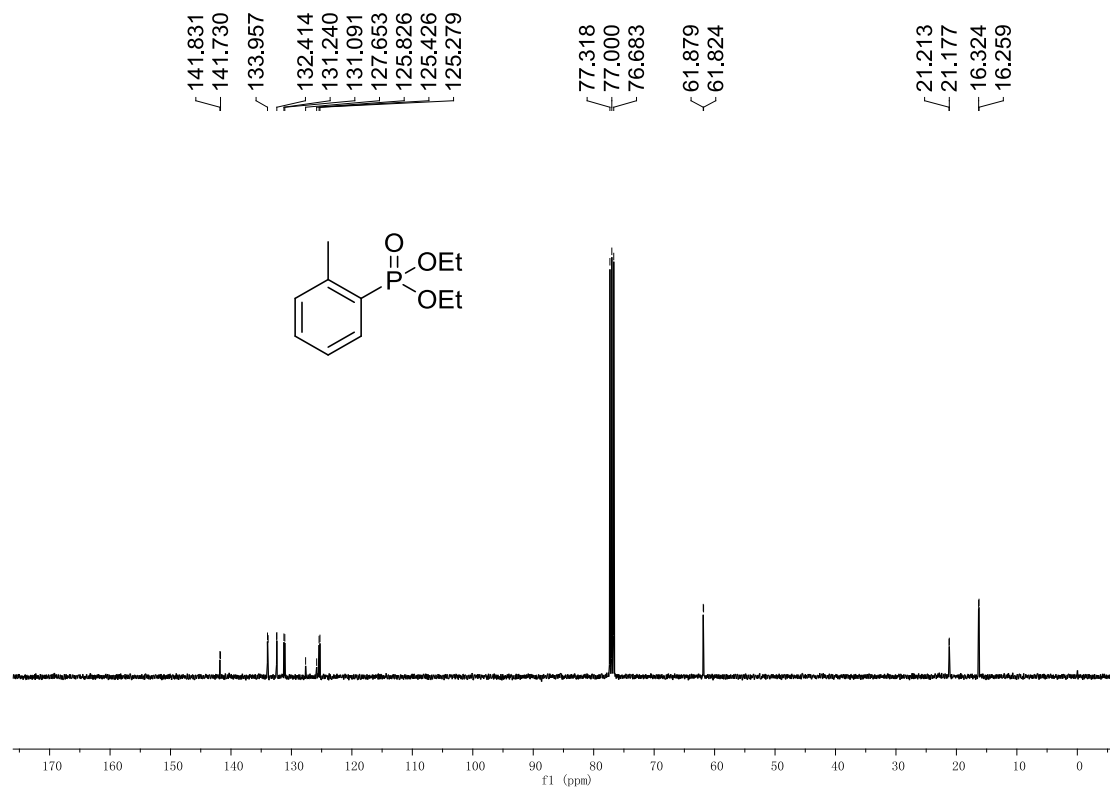

<sup>13</sup>C NMR of 3d

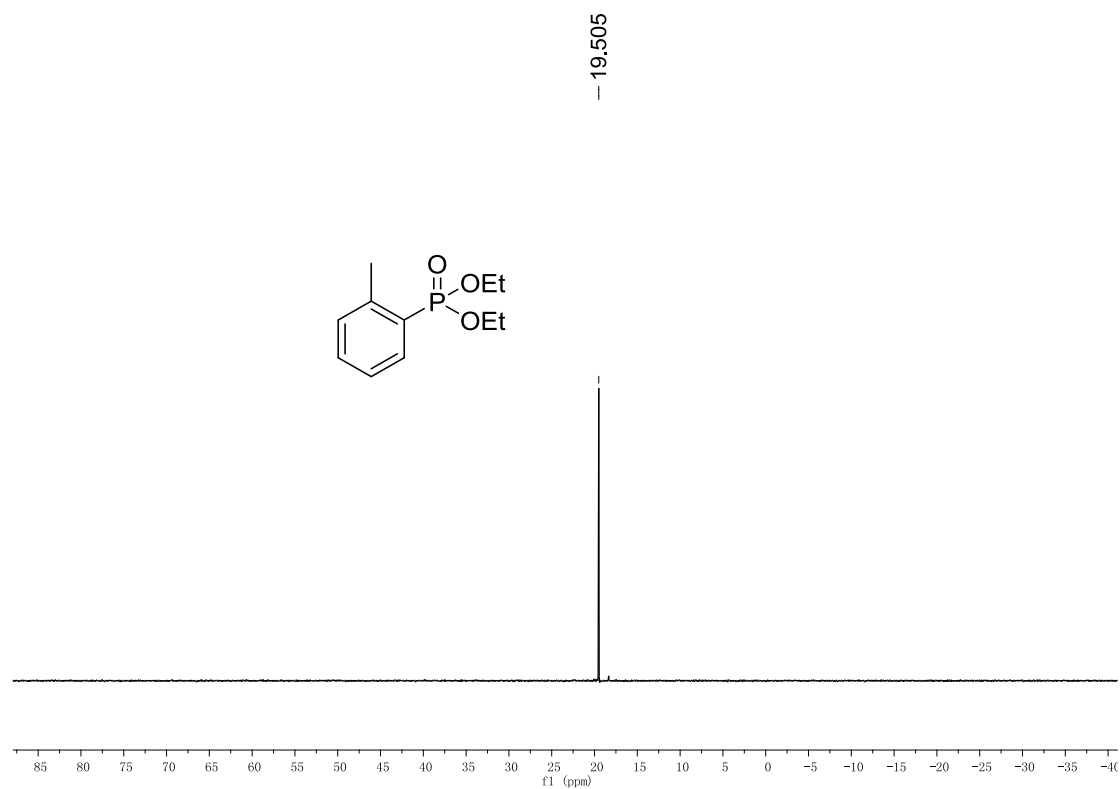

<sup>31</sup>P NMR of 3d

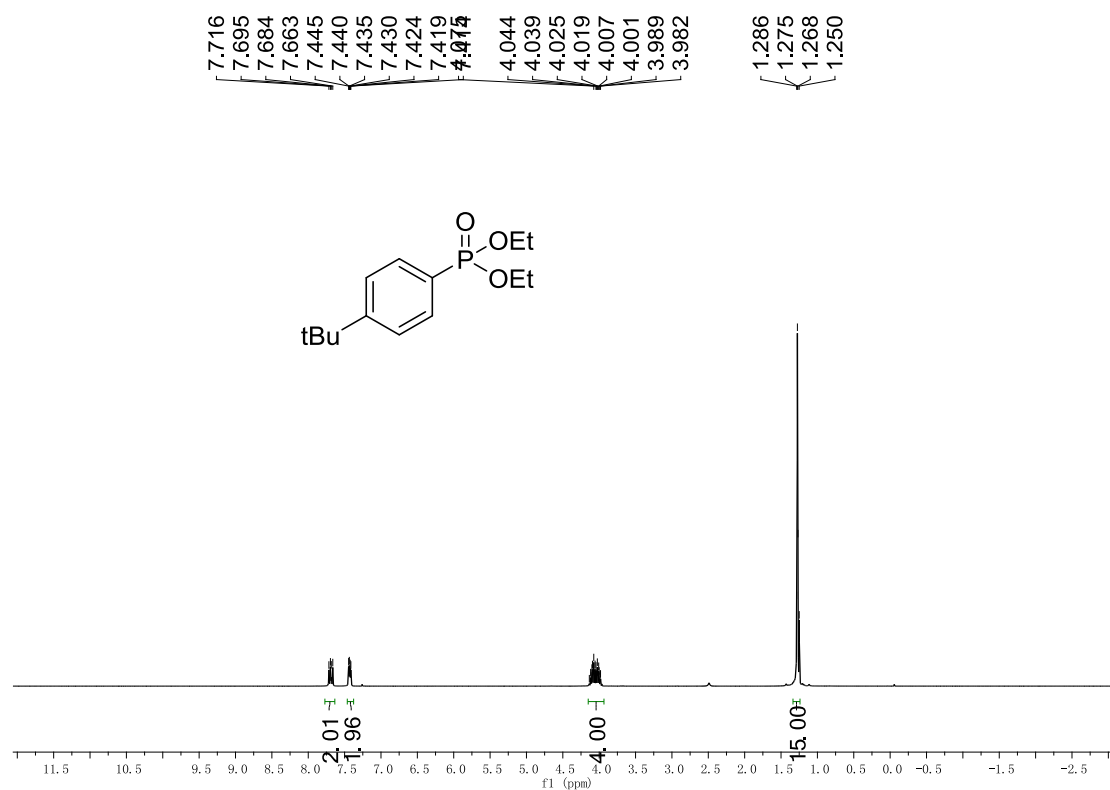

$^1\text{H}$  NMR of **3e**

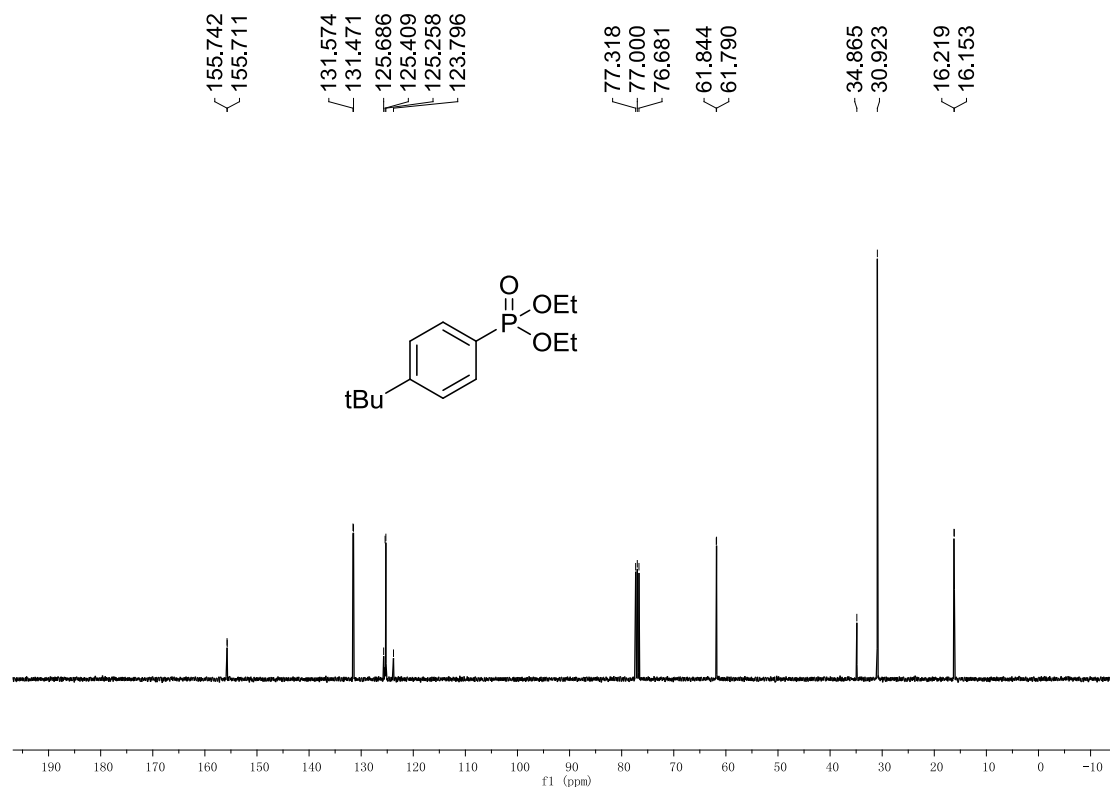

$^{13}\text{C}$  NMR of **3e**

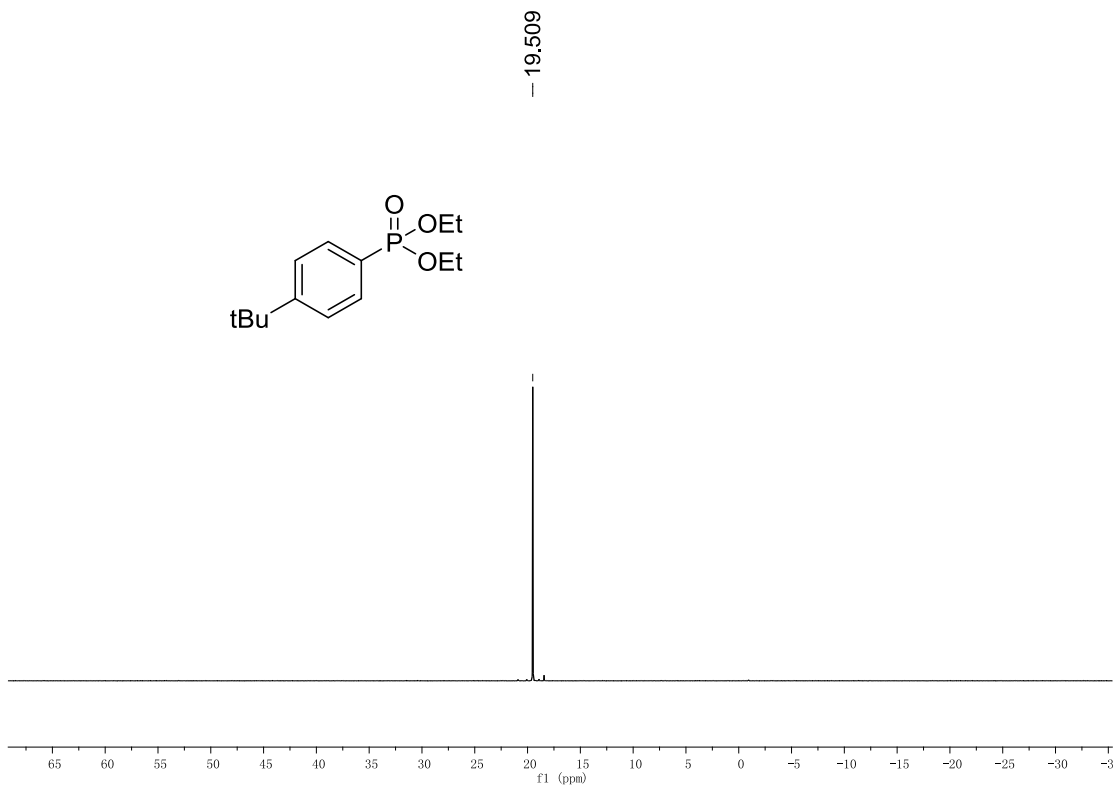

<sup>31</sup>P NMR of **3e**

7.734 7.729 7.716 7.712 7.702 7.697 7.685 7.680  
 6.944 6.936 6.931 6.927 6.922 6.914 6.909  
 4.022 4.020 4.014 4.002 3.996 3.995 3.984 3.977 3.959 3.810  
 1.290 1.272 1.254

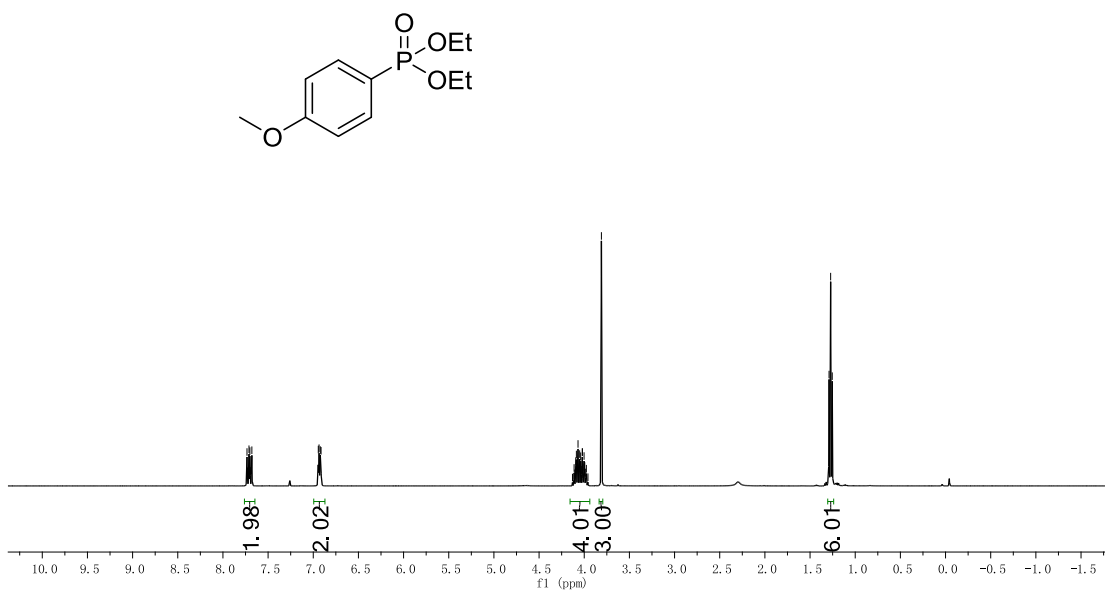

<sup>1</sup>H NMR of **3f**

162.770  
162.736

133.716  
133.603

120.262  
118.325  
113.993  
113.834

77.319  
77.000  
76.682

61.863  
61.810  
55.224

16.239  
16.173

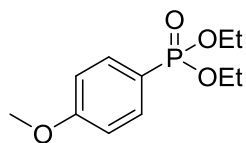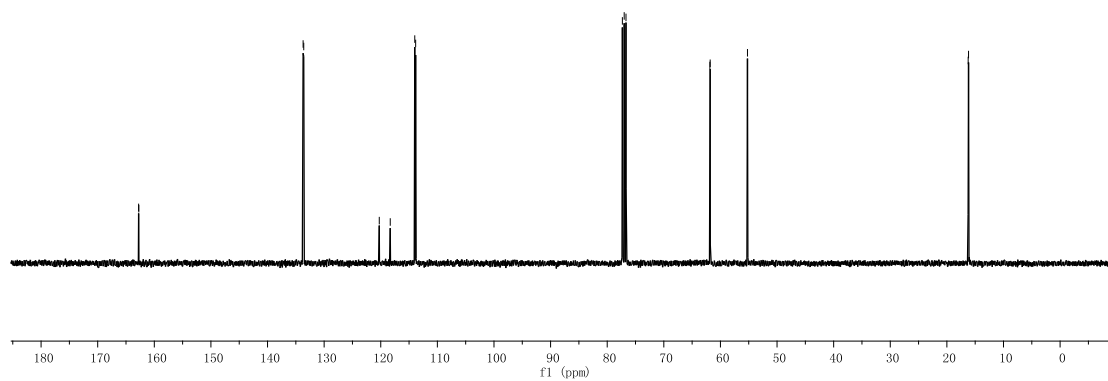

<sup>13</sup>C NMR of **3f**

19.770

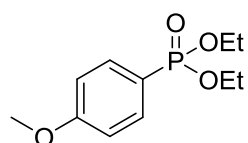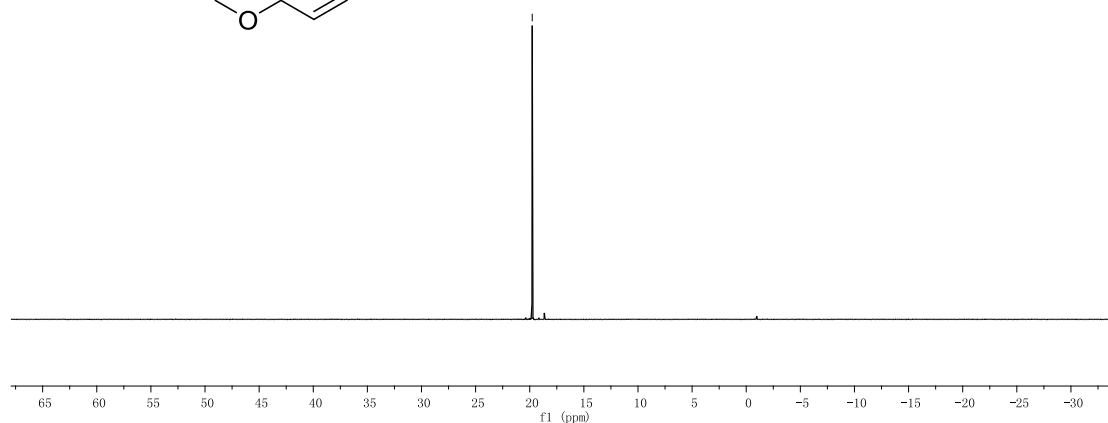

<sup>31</sup>P NMR of **3f**

7.739  
7.722  
7.718  
7.707  
7.690  
7.686  
6.955  
6.947  
6.938  
6.933  
6.925  
4.132  
4.101  
4.083  
4.063  
4.045  
4.020  
4.002  
3.983  
3.732  
3.701  
2.238  
2.223  
2.207  
2.192  
1.297  
1.279  
1.262

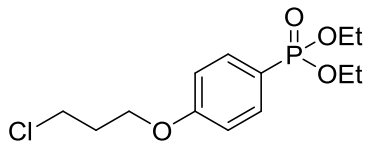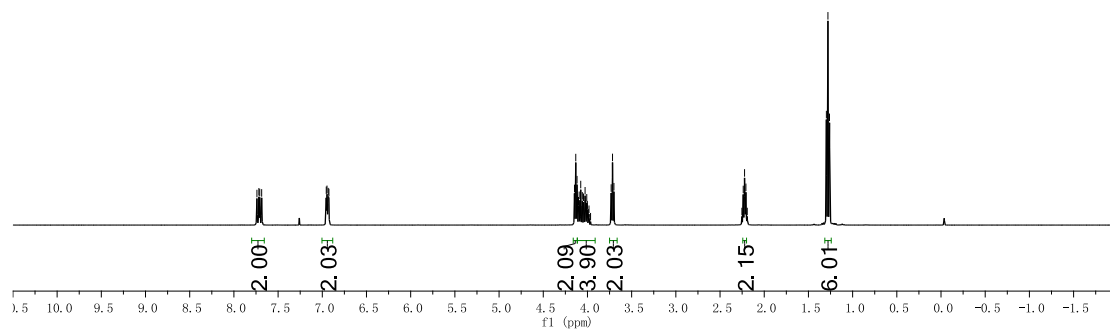

<sup>1</sup>H NMR of **3g**

161.880  
161.846  
133.766  
133.653  
120.565  
118.630  
114.444  
114.284  
77.318  
77.000  
76.682  
64.173  
61.864  
61.812  
-41.194  
-31.903  
16.259  
16.193

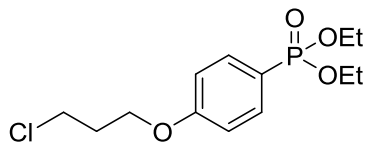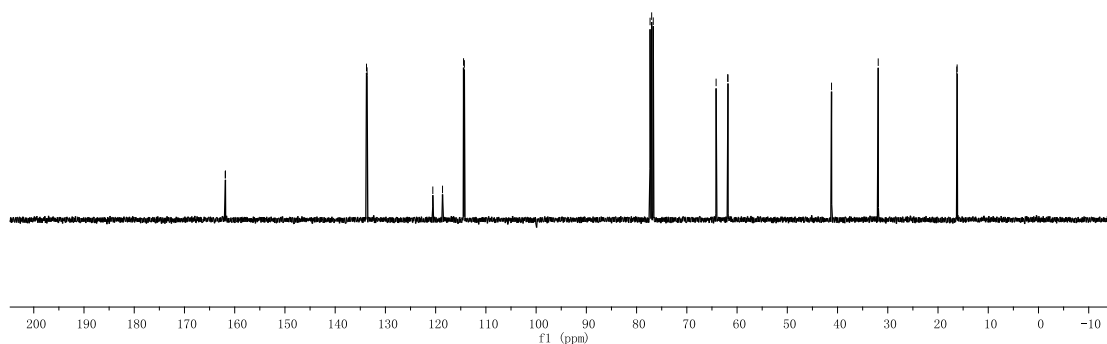

<sup>13</sup>C NMR of **3g**

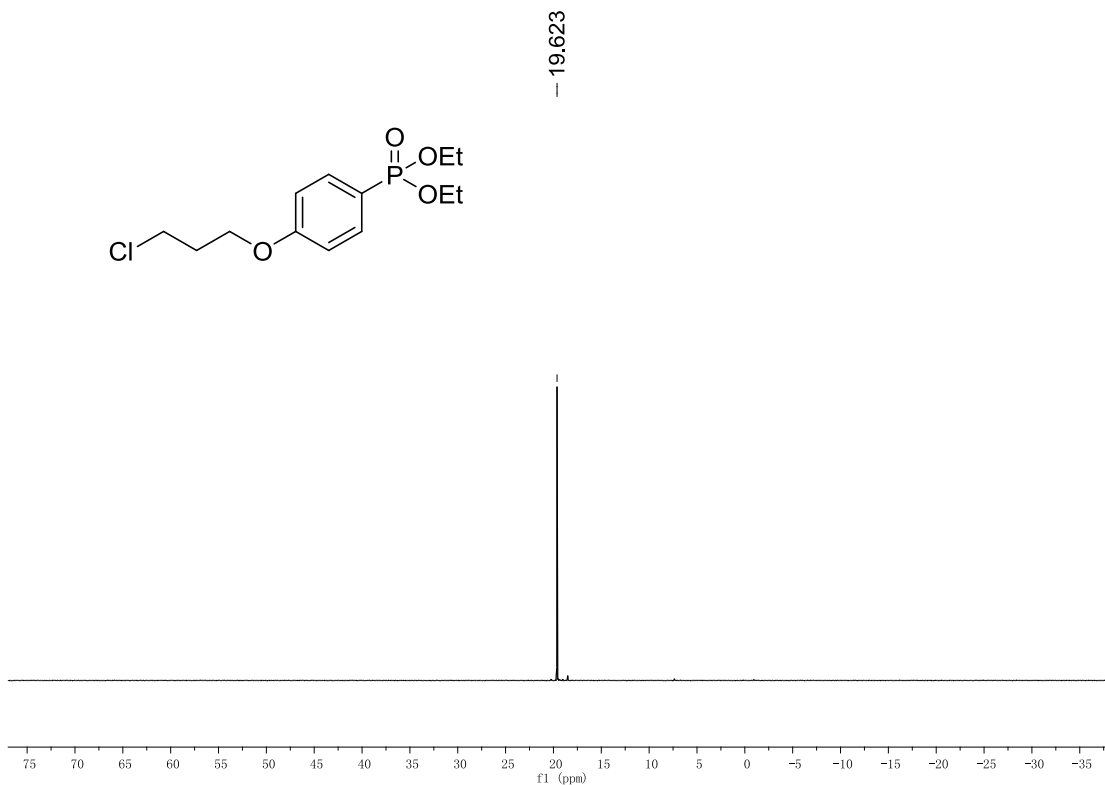

$^{31}\text{P}$  NMR of 3g

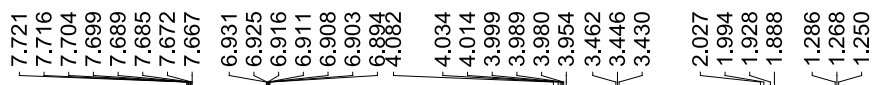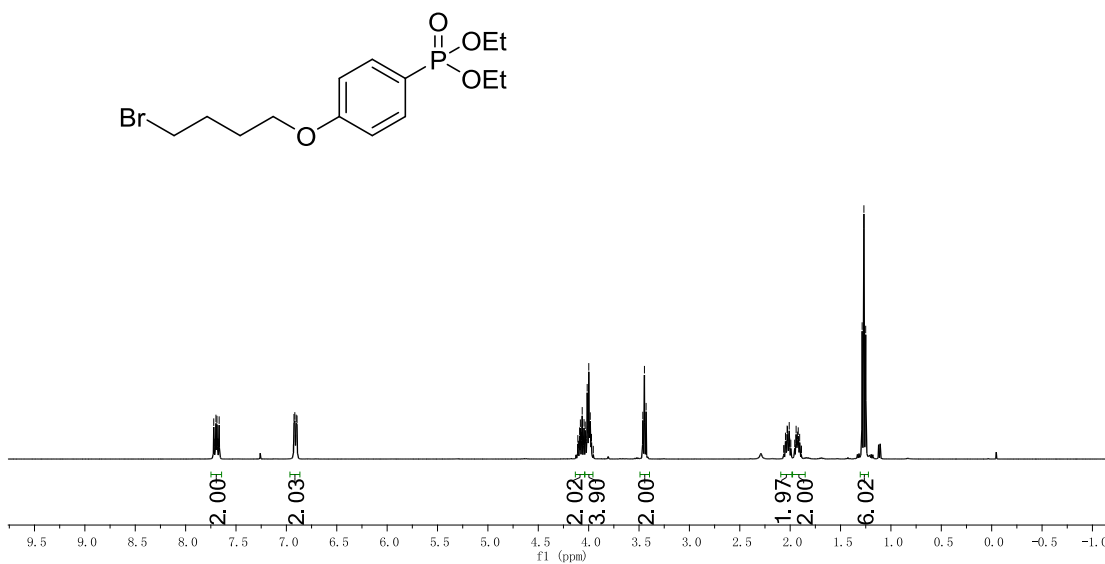

$^1\text{H}$  NMR of 3h

$\swarrow$  162.014  
 $\swarrow$  161.981  
  
 $\swarrow$  133.709  
 $\swarrow$  133.597  
  
 $\swarrow$  120.328  
 $\swarrow$  118.391  
 $\swarrow$  114.378  
 $\swarrow$  114.219  
  
 $\swarrow$  77.319  
 $\swarrow$  77.000  
 $\swarrow$  76.682  
 $\swarrow$  66.810  
 $\swarrow$  61.816  
 $\swarrow$  61.764  
  
 $\swarrow$  33.187  
 $\swarrow$  29.205  
 $\swarrow$  27.579  
  
 $\swarrow$  16.236  
 $\swarrow$  16.171

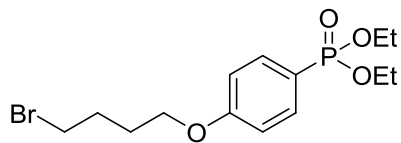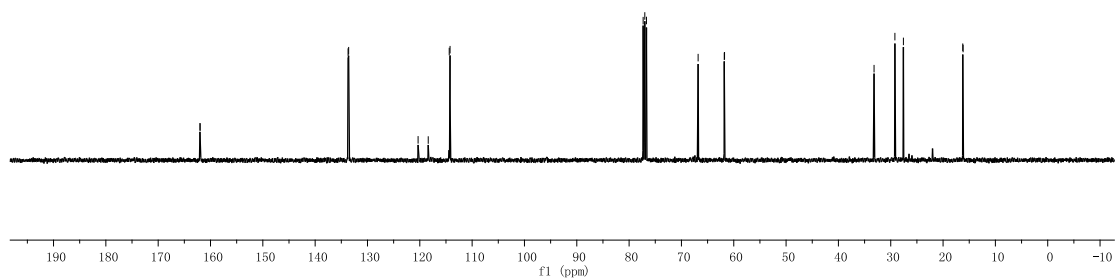

$^{13}\text{C}$  NMR of **3h**

$\swarrow$  19.688

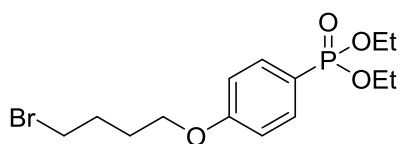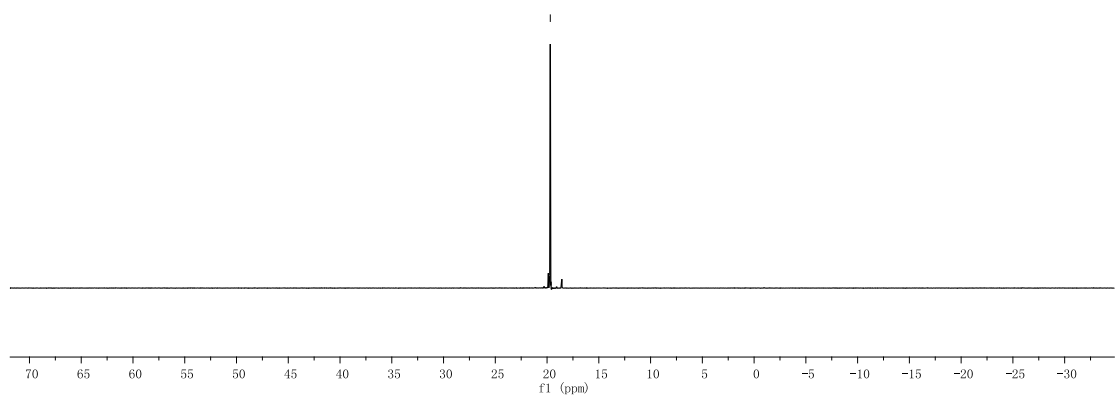

$^{31}\text{P}$  NMR of **3h**



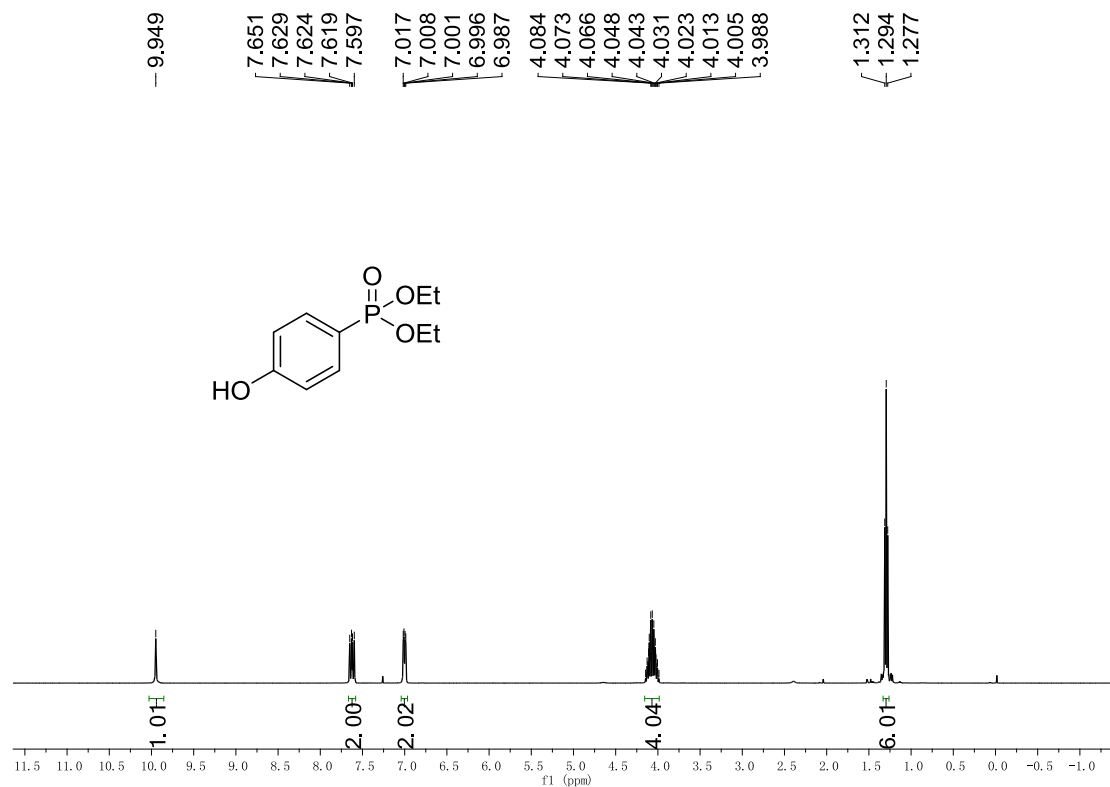

$^1\text{H}$  NMR of 3i

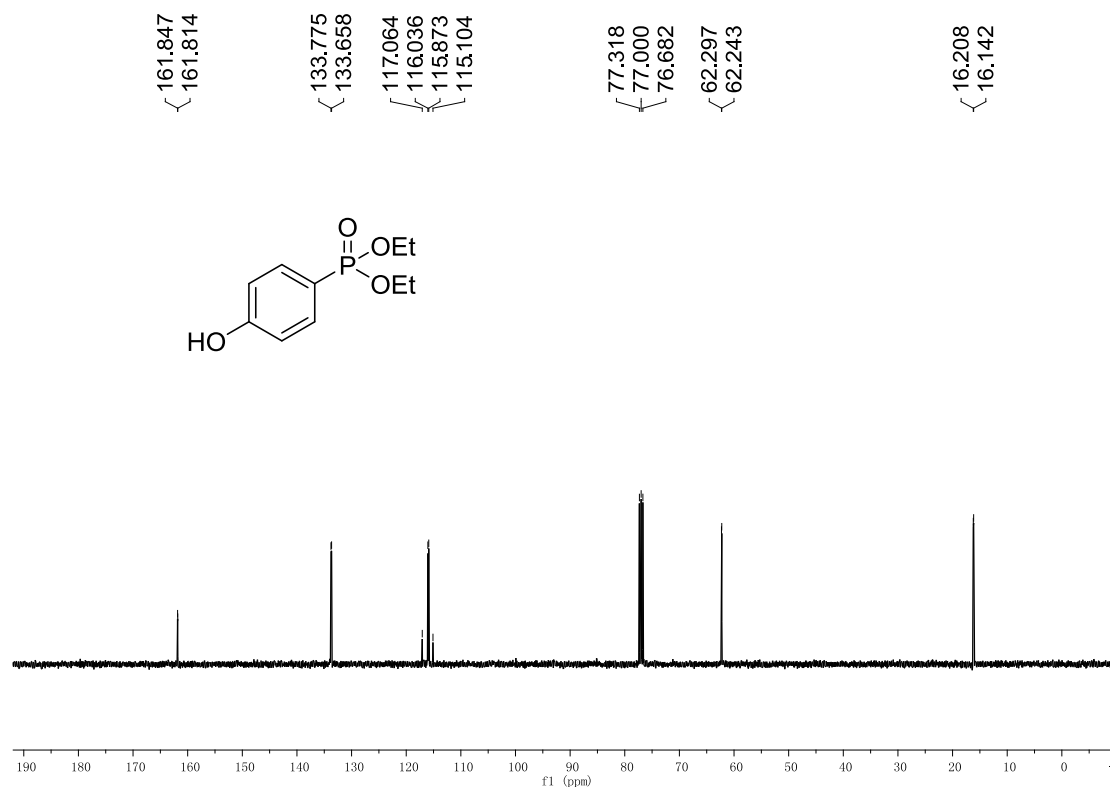

$^{13}\text{C}$  NMR of 3i

-21.098

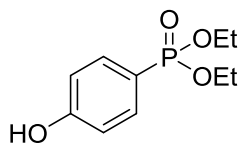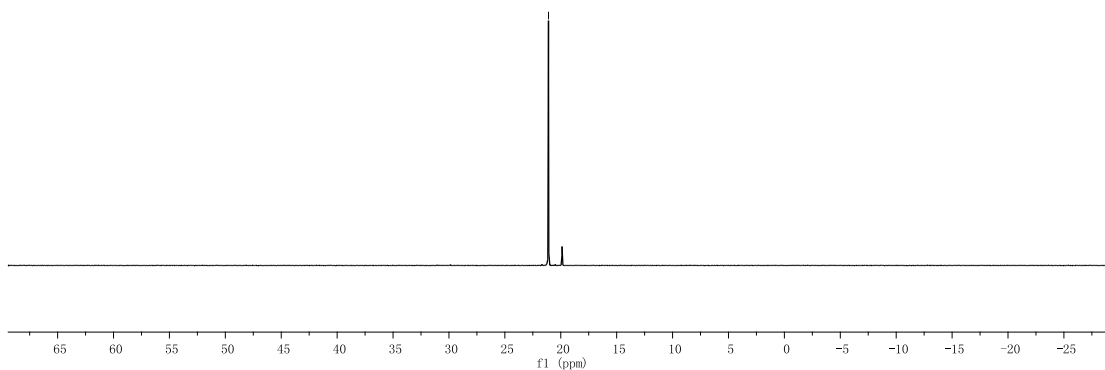

<sup>31</sup>P NMR of 3i

7.811  
7.797  
7.790  
7.777  
7.765  
7.758  
7.744  
7.136  
7.128  
7.114  
7.106  
7.093  
7.085  
4.088  
4.070  
4.059  
4.052  
4.041  
4.034  
4.022  
4.016  
4.004  
3.997  
3.979  
1.293  
1.276  
1.258

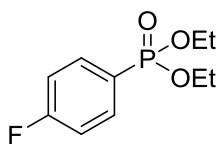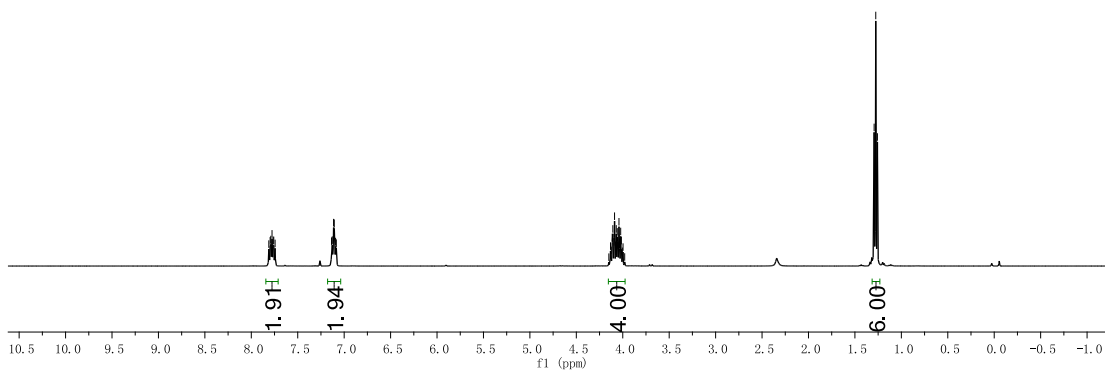

<sup>1</sup>H NMR of 3j

166.503  
166.464  
163.983  
163.945  
134.349  
134.261  
134.237  
134.148  
- 123.299  
115.915  
115.752  
115.701  
115.540  
77.318  
77.000  
76.681  
62.132  
62.078  
16.226  
16.161

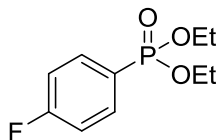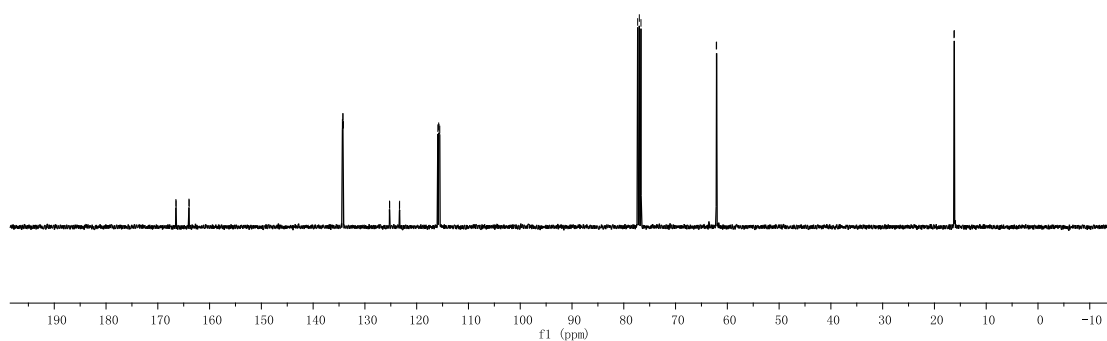

<sup>13</sup>C NMR of **3j**

17.838  
-

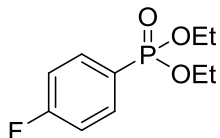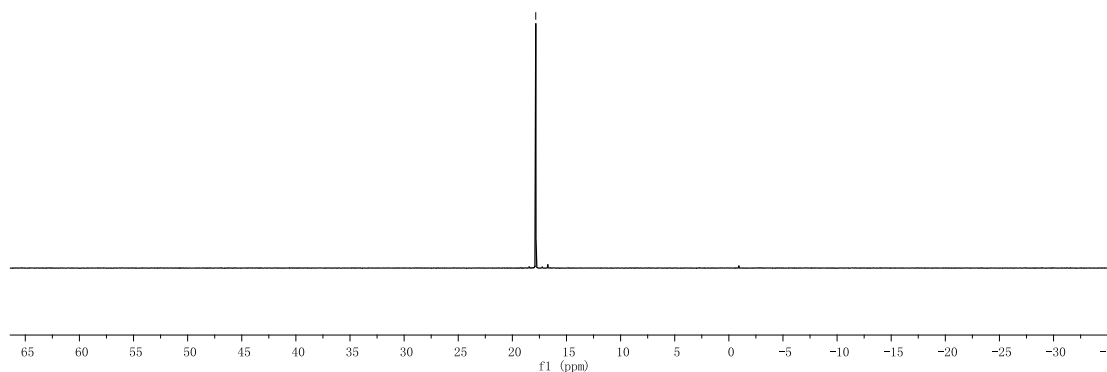

<sup>31</sup>P NMR of **3j**

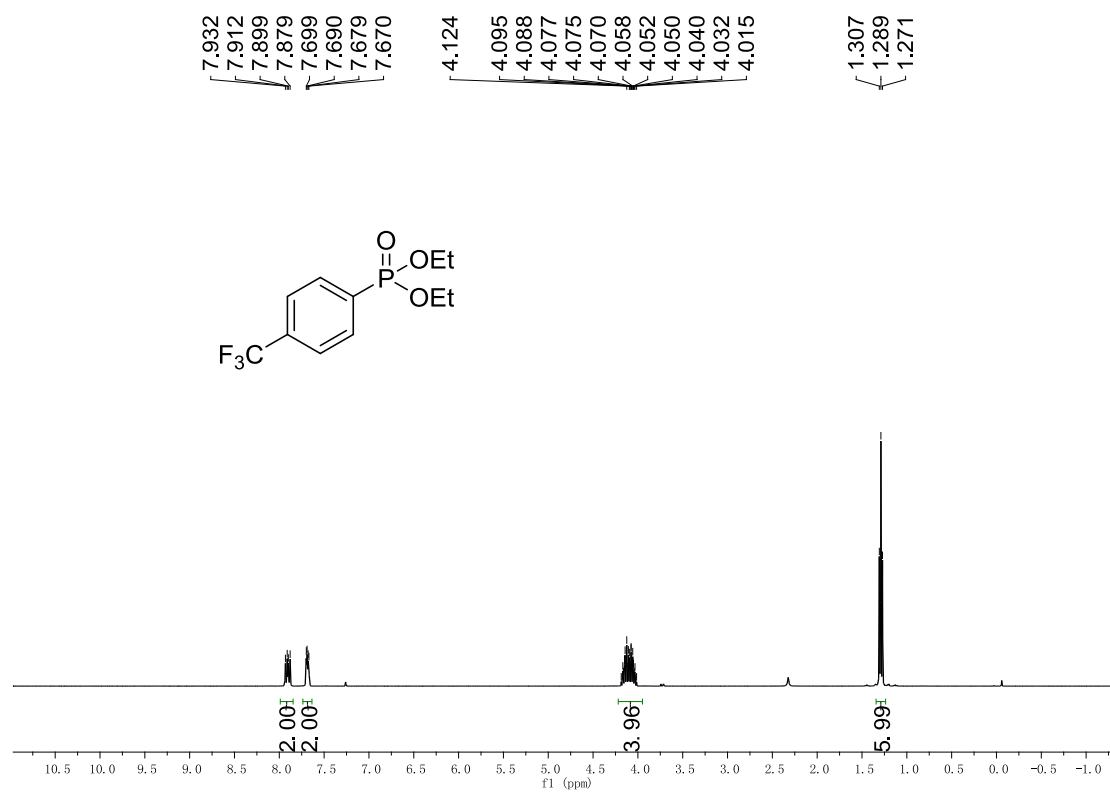

<sup>1</sup>H NMR of 3k

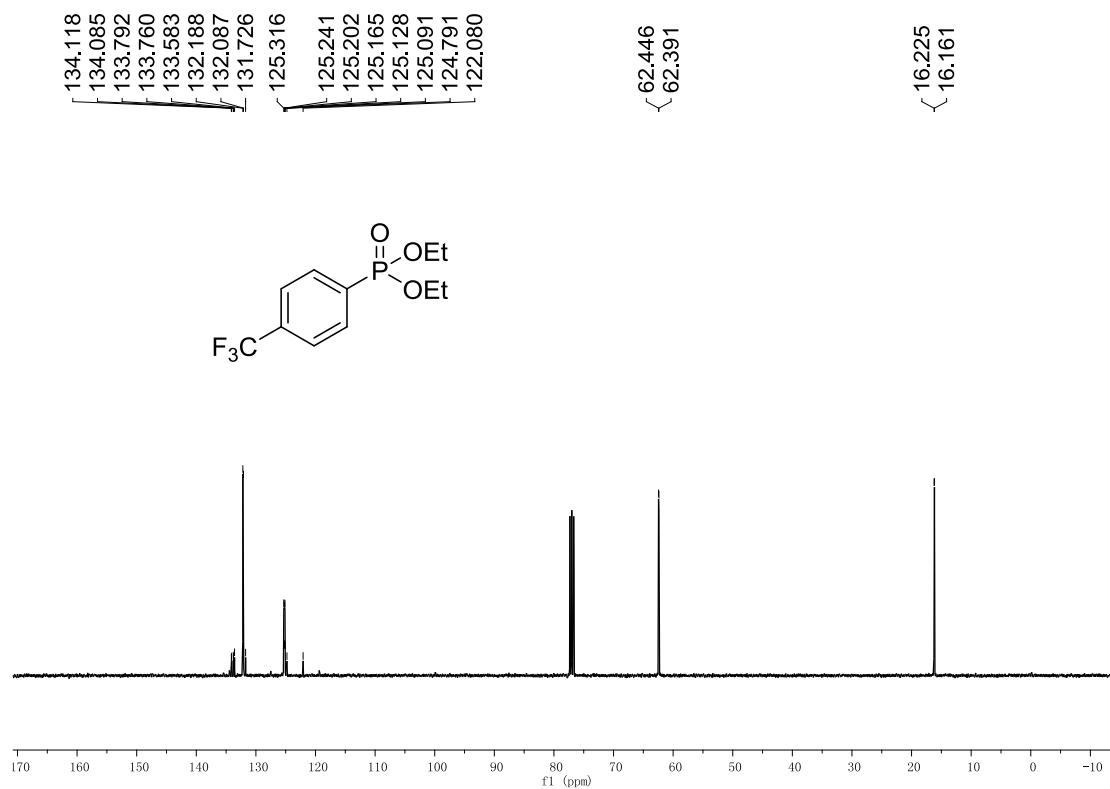

<sup>13</sup>C NMR of 3k

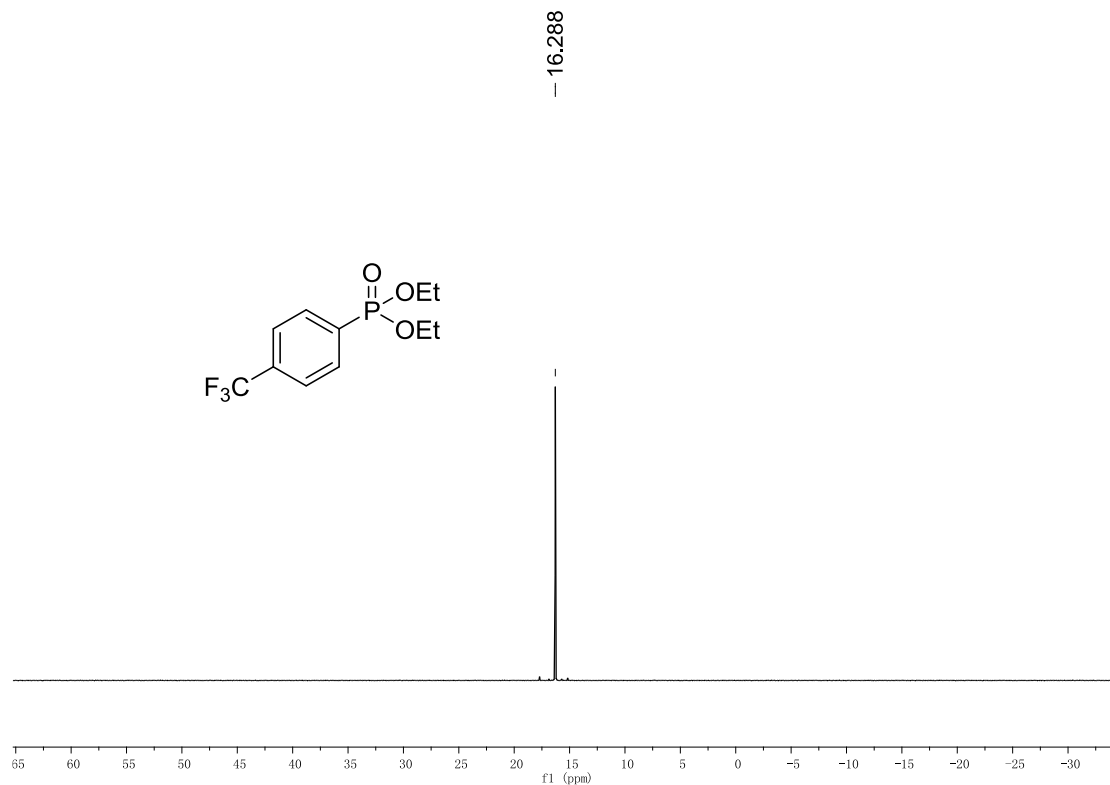

$^{31}\text{P}$  NMR of 3k

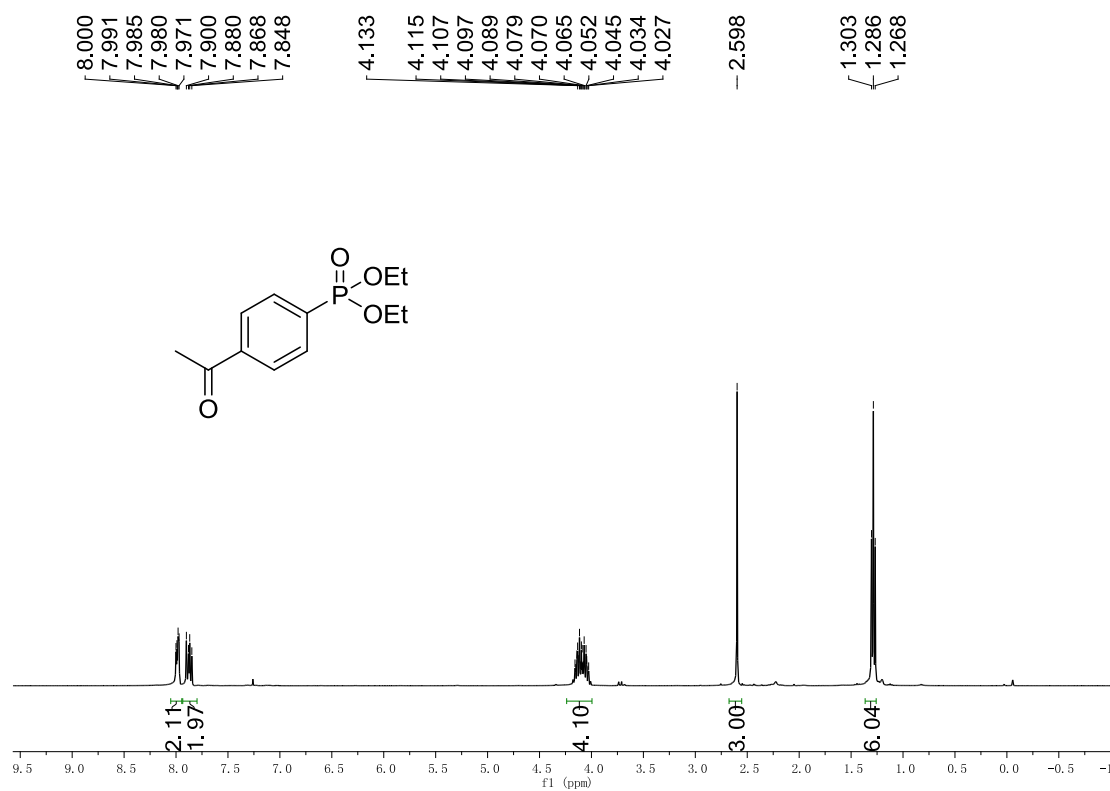

$^1\text{H}$  NMR of 3l

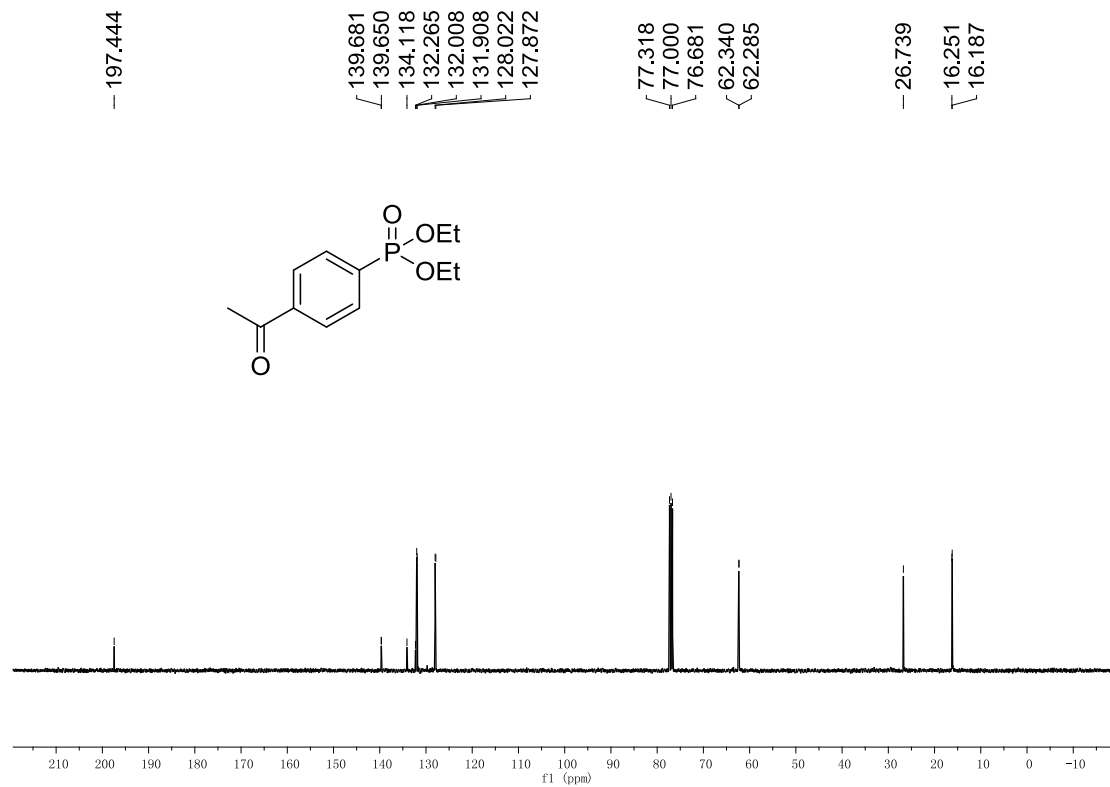

$^{13}\text{C}$  NMR of **31**

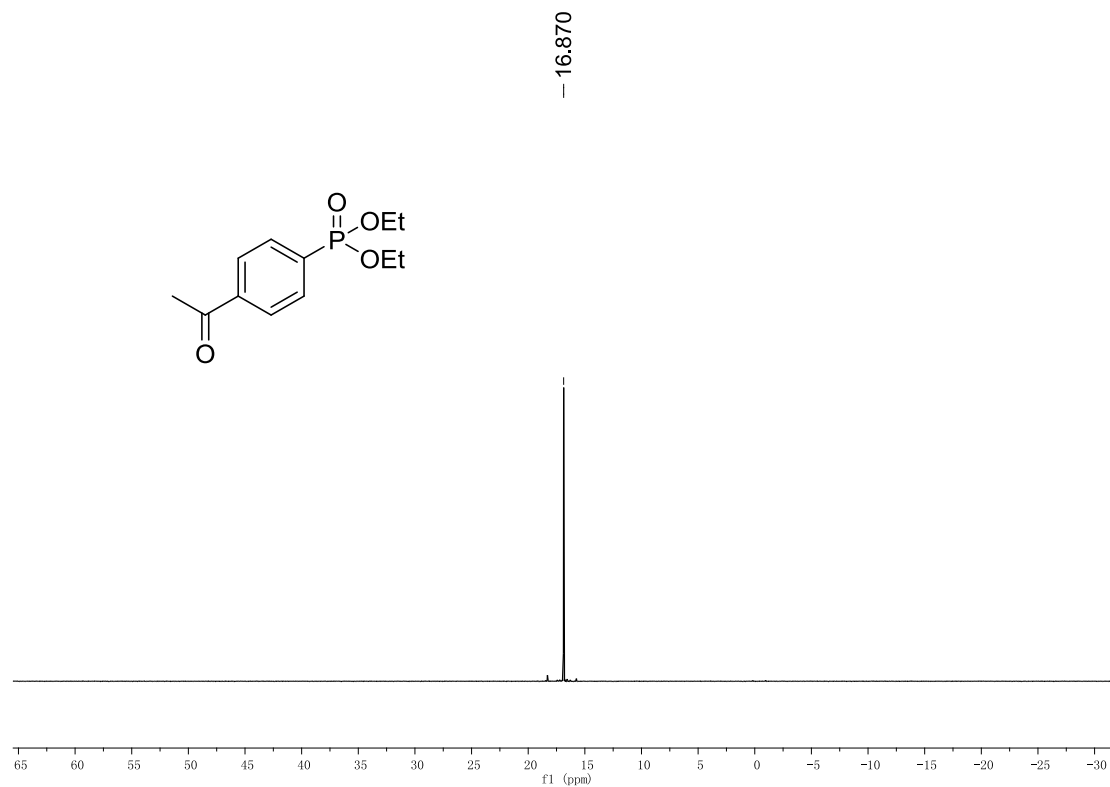

$^{31}\text{P}$  NMR of **31**

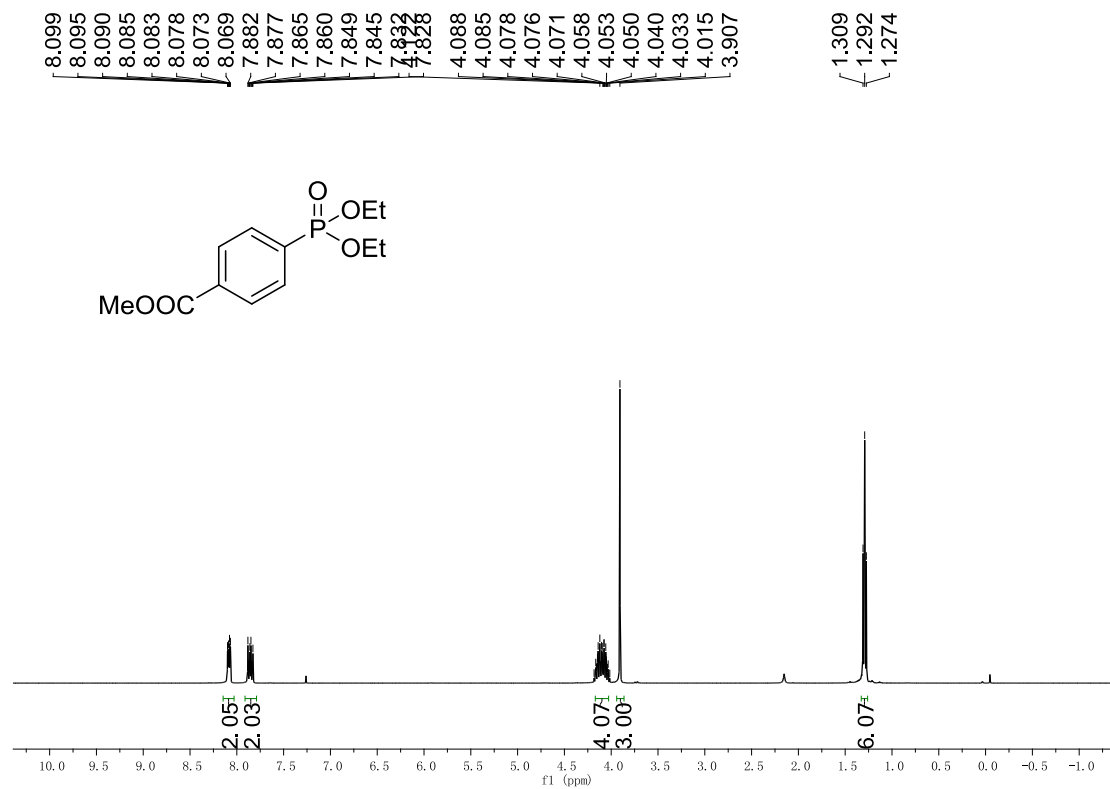

<sup>1</sup>H NMR of **3m**

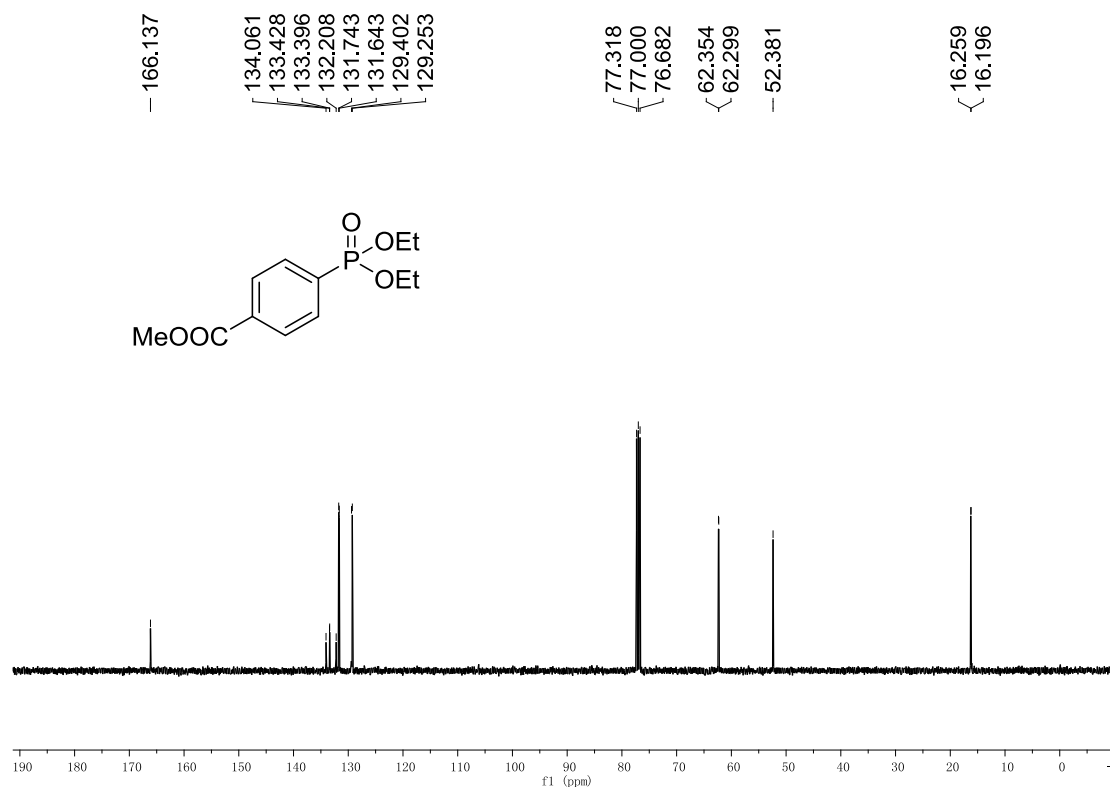

<sup>13</sup>C NMR of **3m**

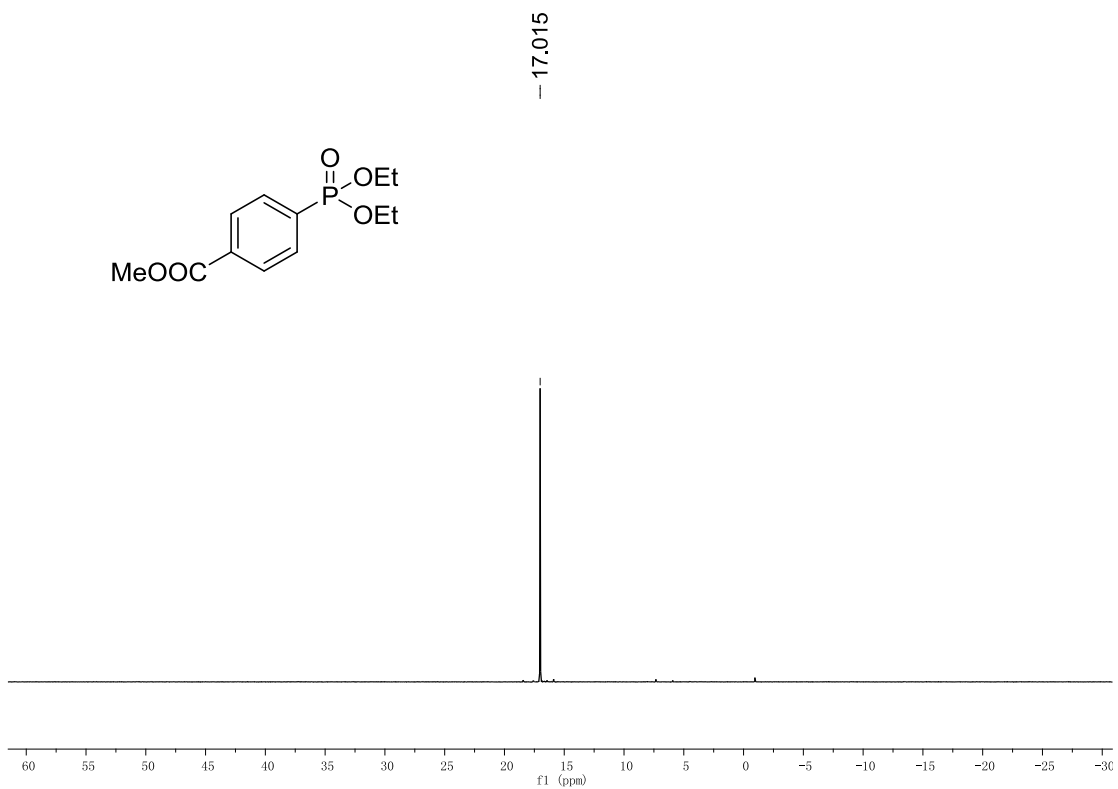

$^{31}\text{P}$  NMR of **3m**

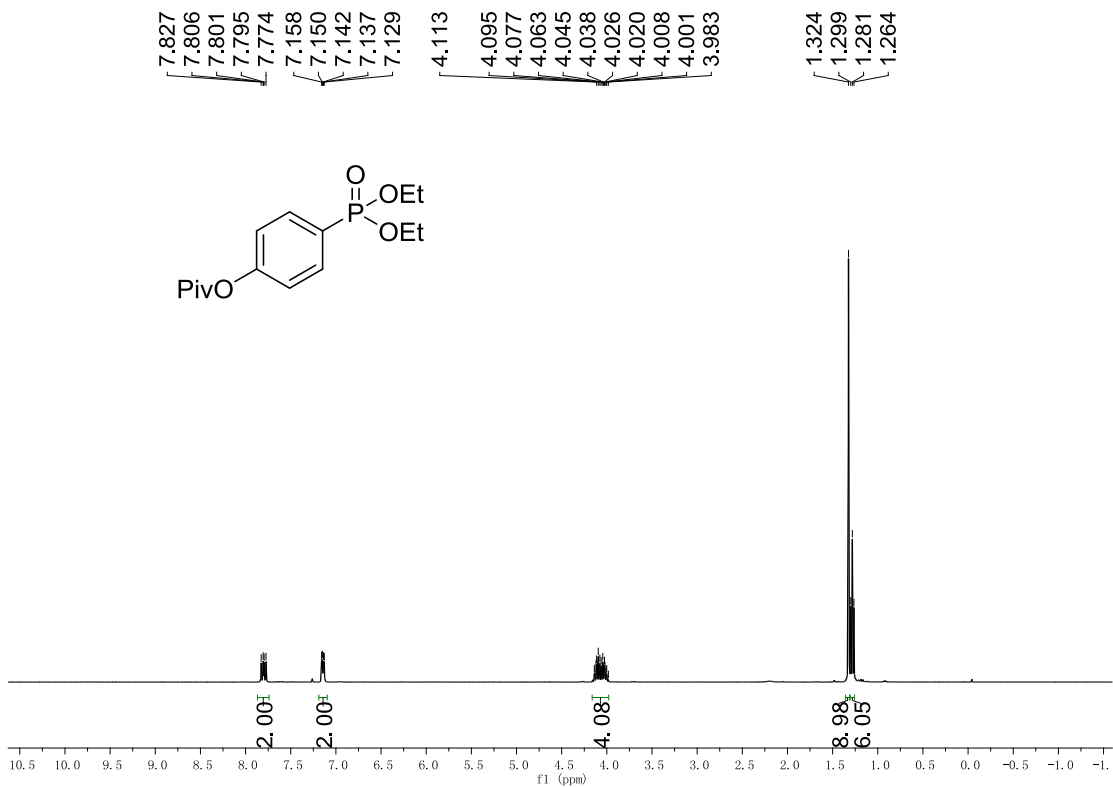

$^1\text{H}$  NMR of **3m**



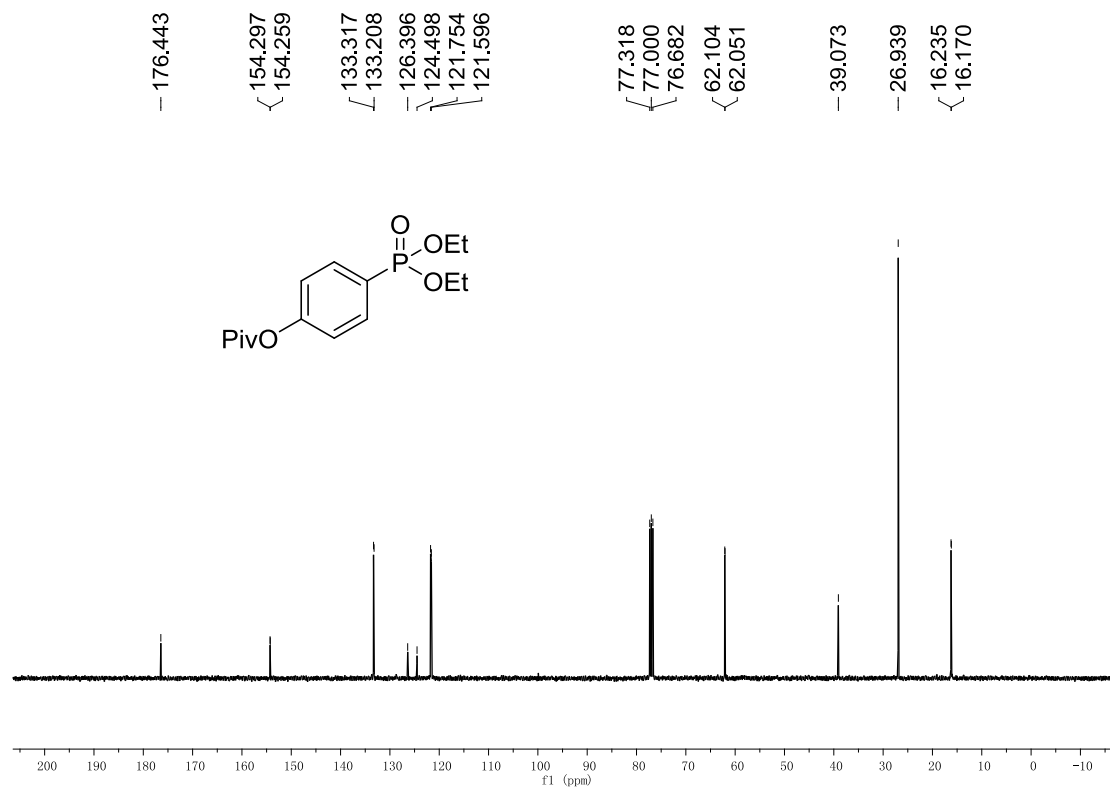

<sup>13</sup>C NMR of 3n

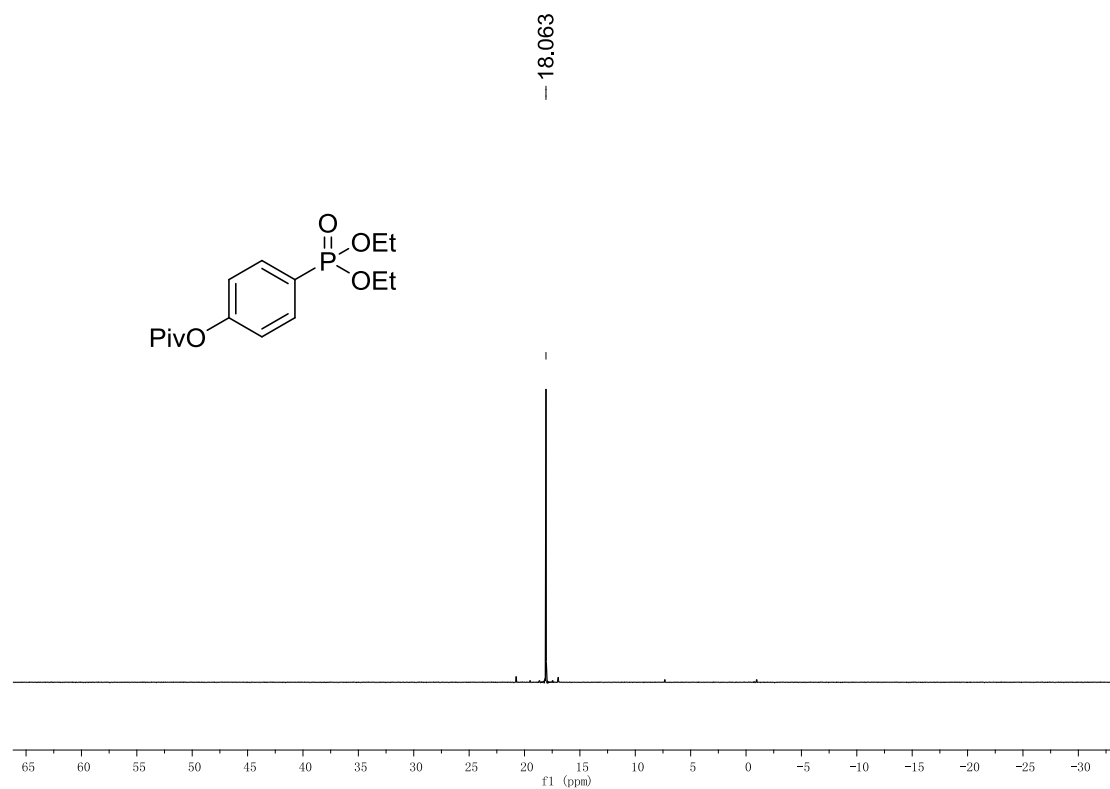

<sup>31</sup>P NMR of 3n

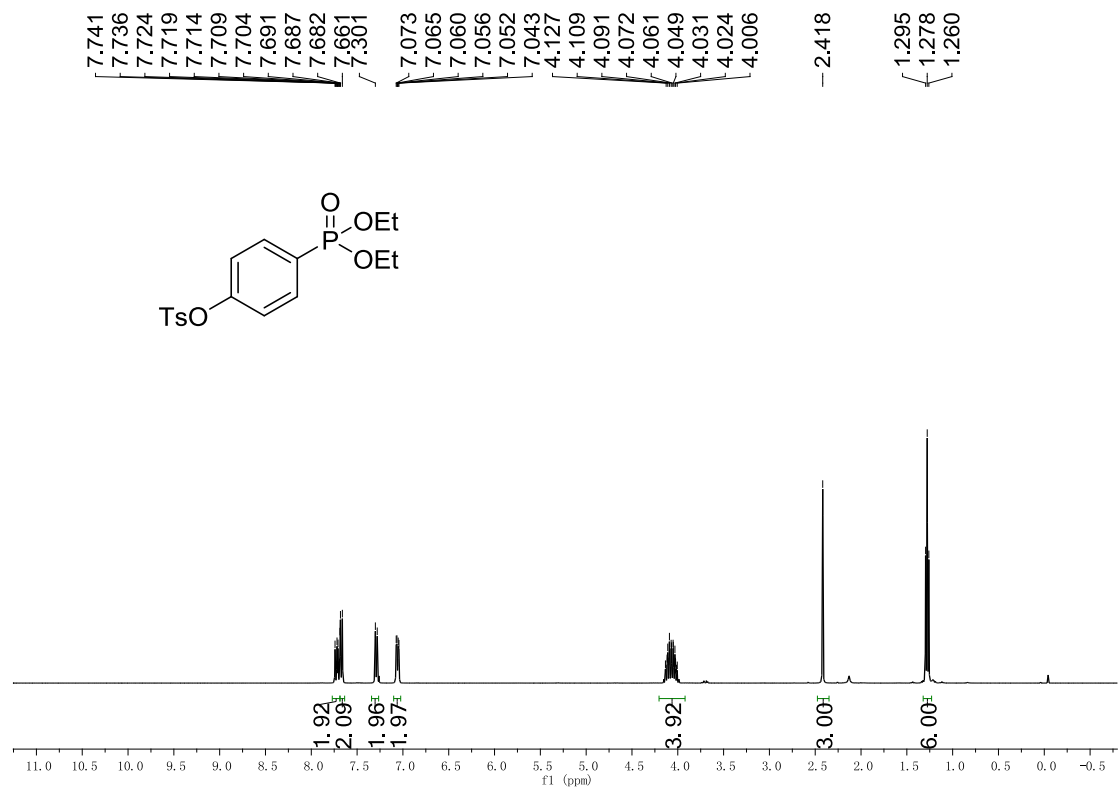

<sup>1</sup>H NMR of **30**

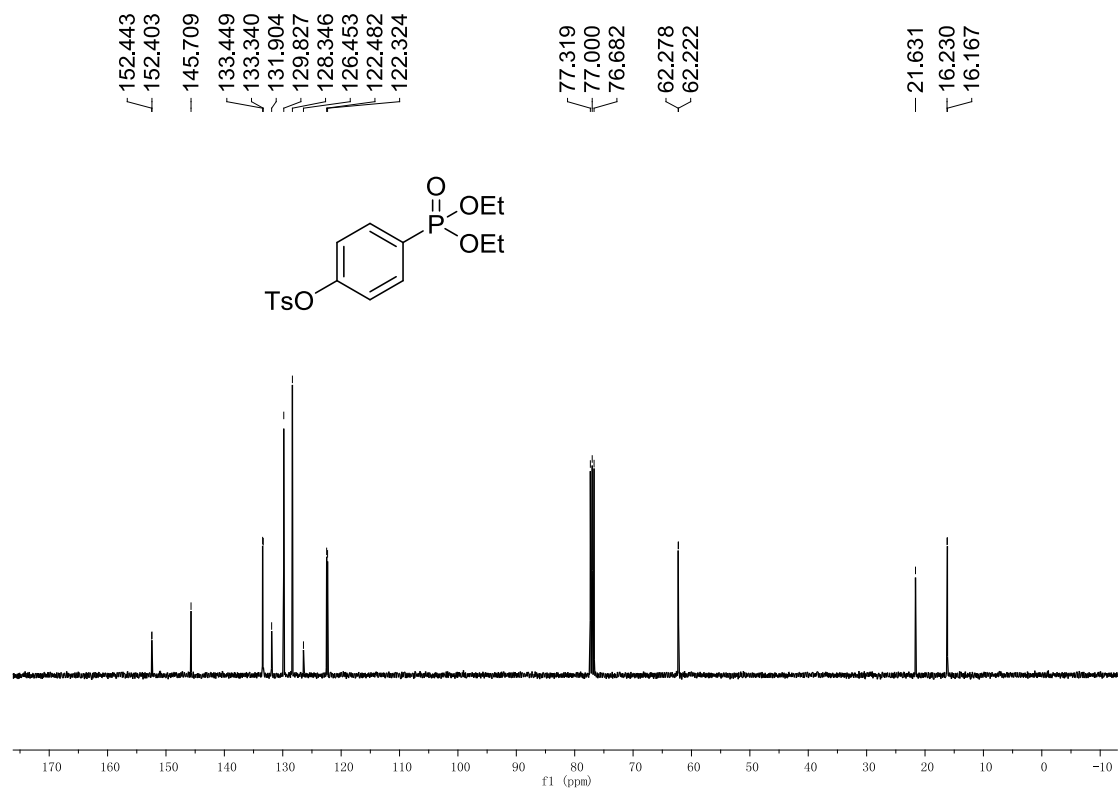

<sup>13</sup>C NMR of **30**

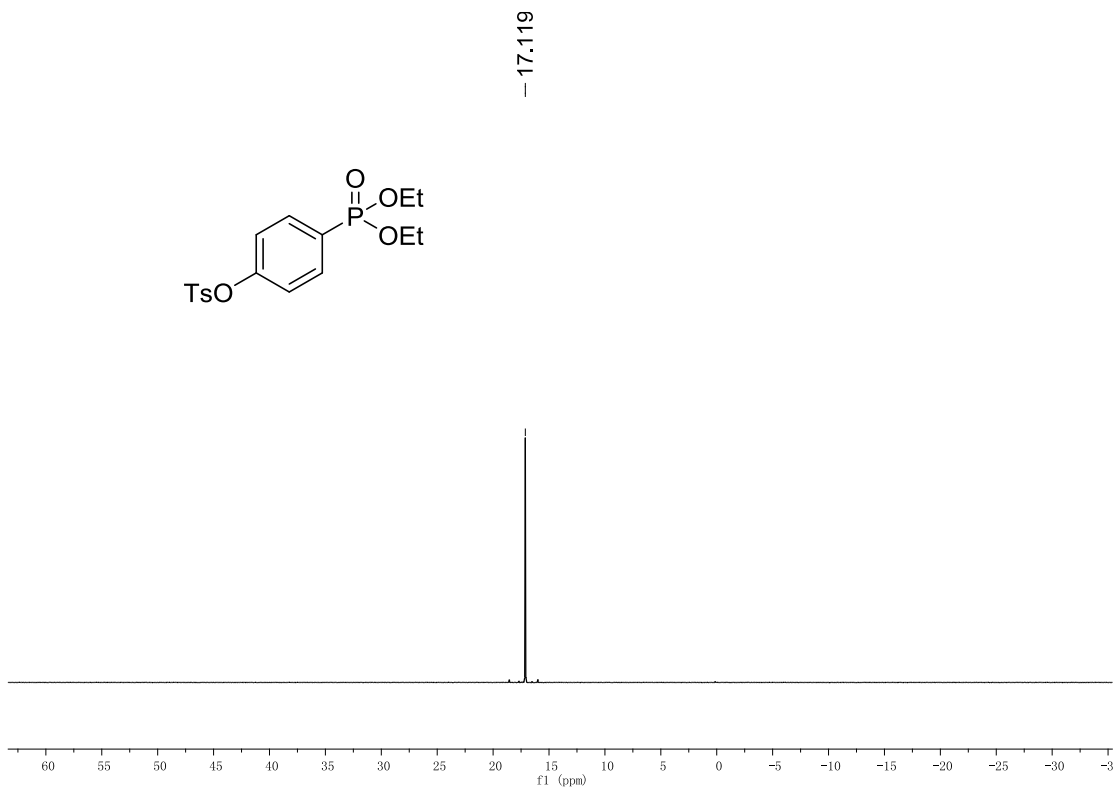

<sup>31</sup>P NMR of **3o**

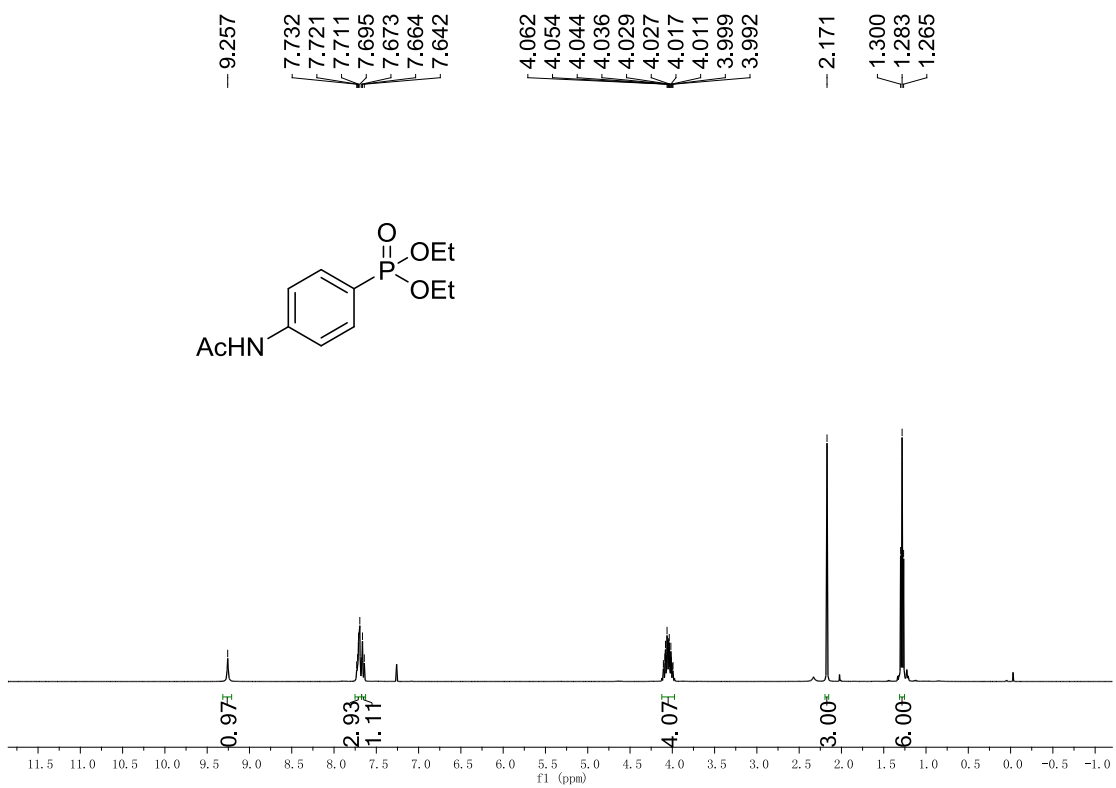

<sup>1</sup>H NMR of **3p**

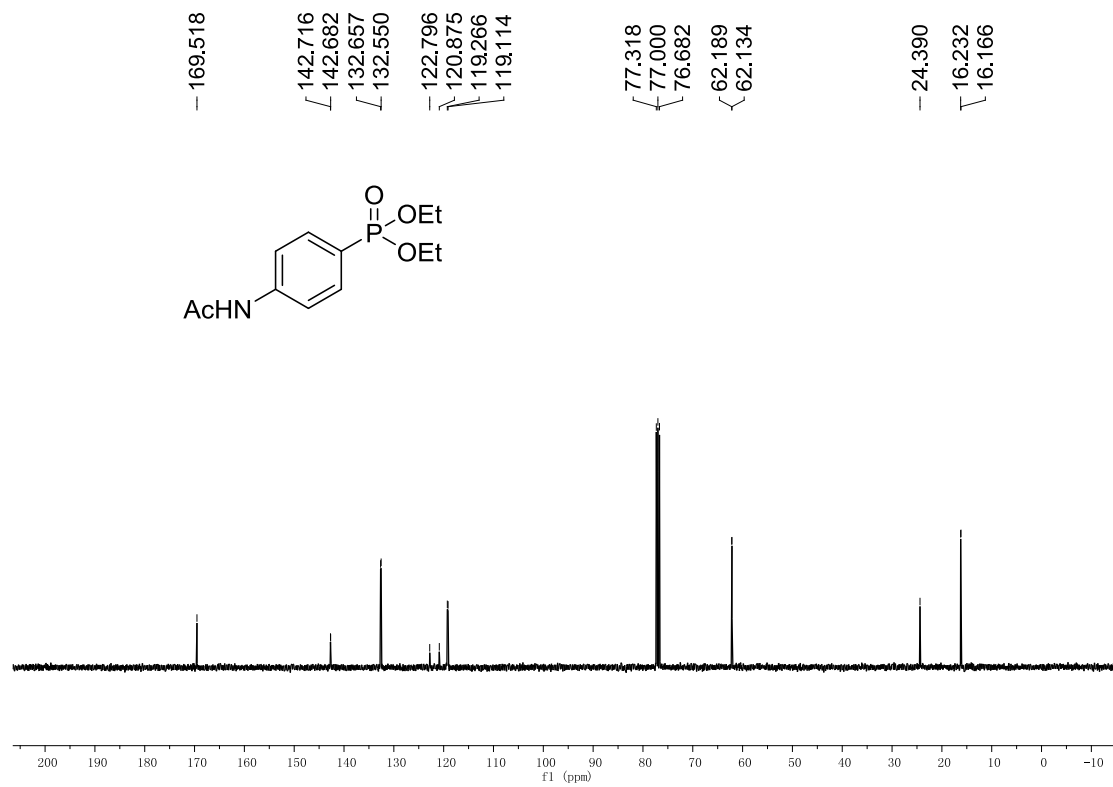

<sup>13</sup>C NMR of 3p

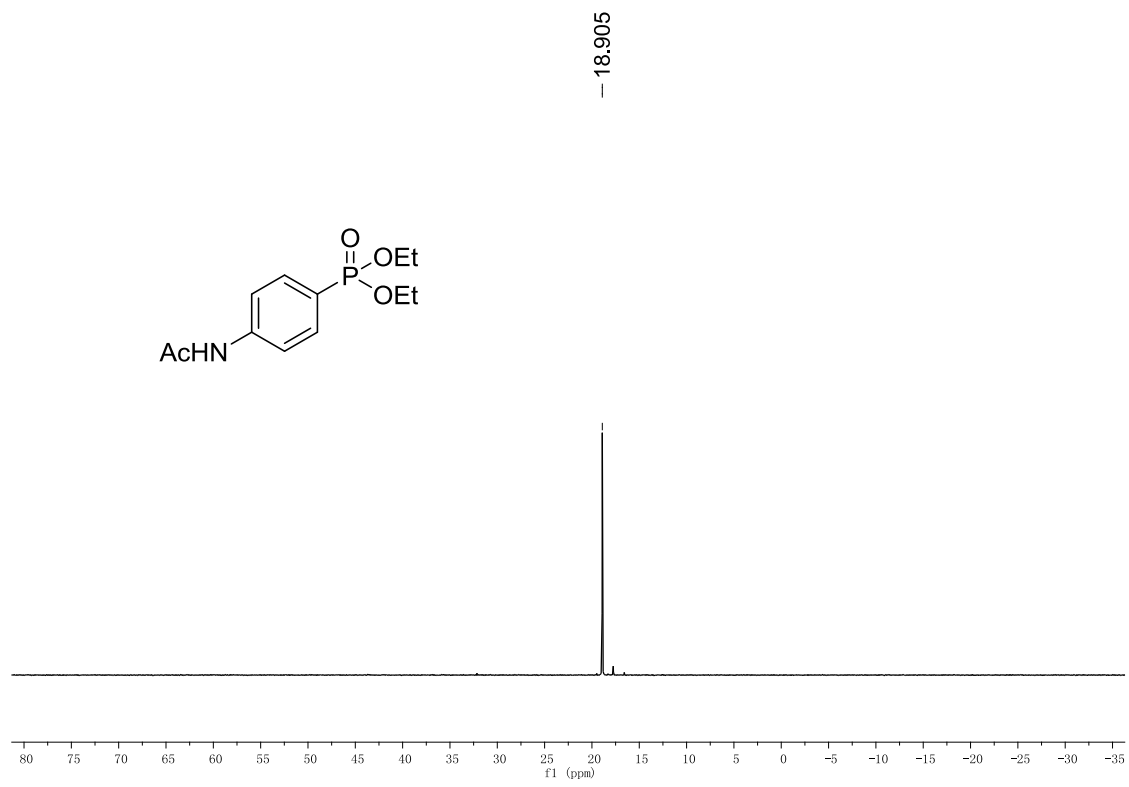

<sup>31</sup>P NMR of 3p

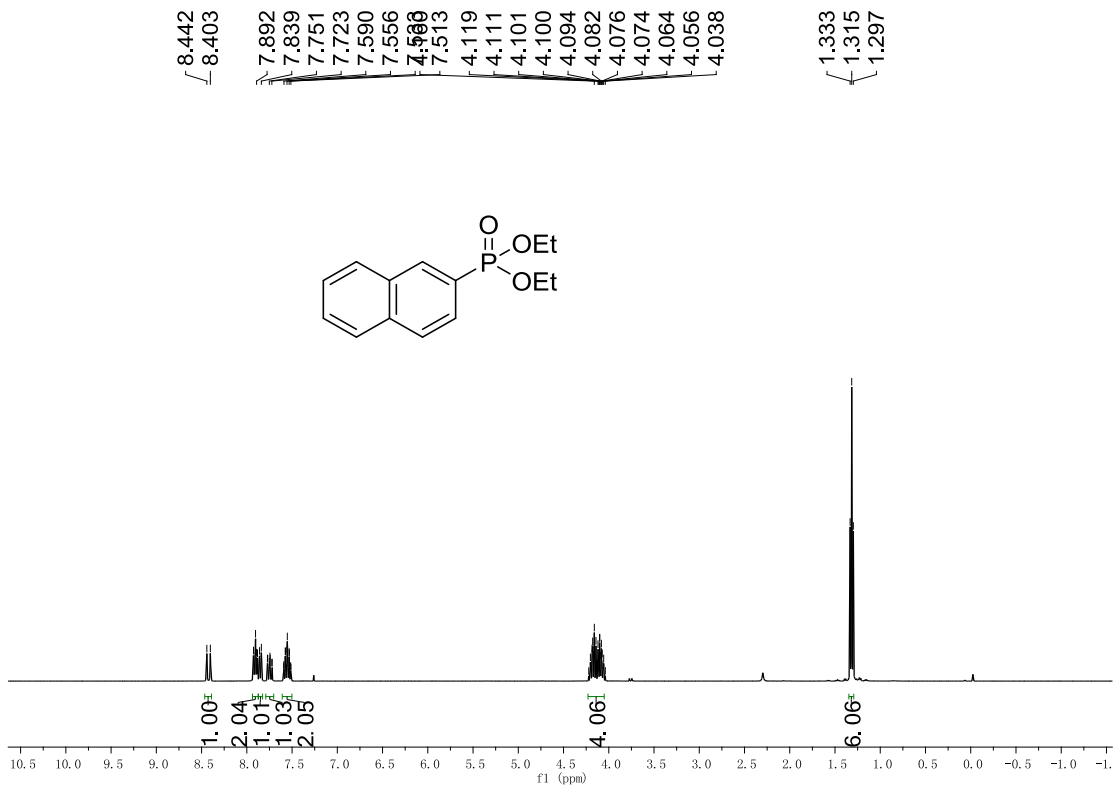

<sup>1</sup>H NMR of 3q

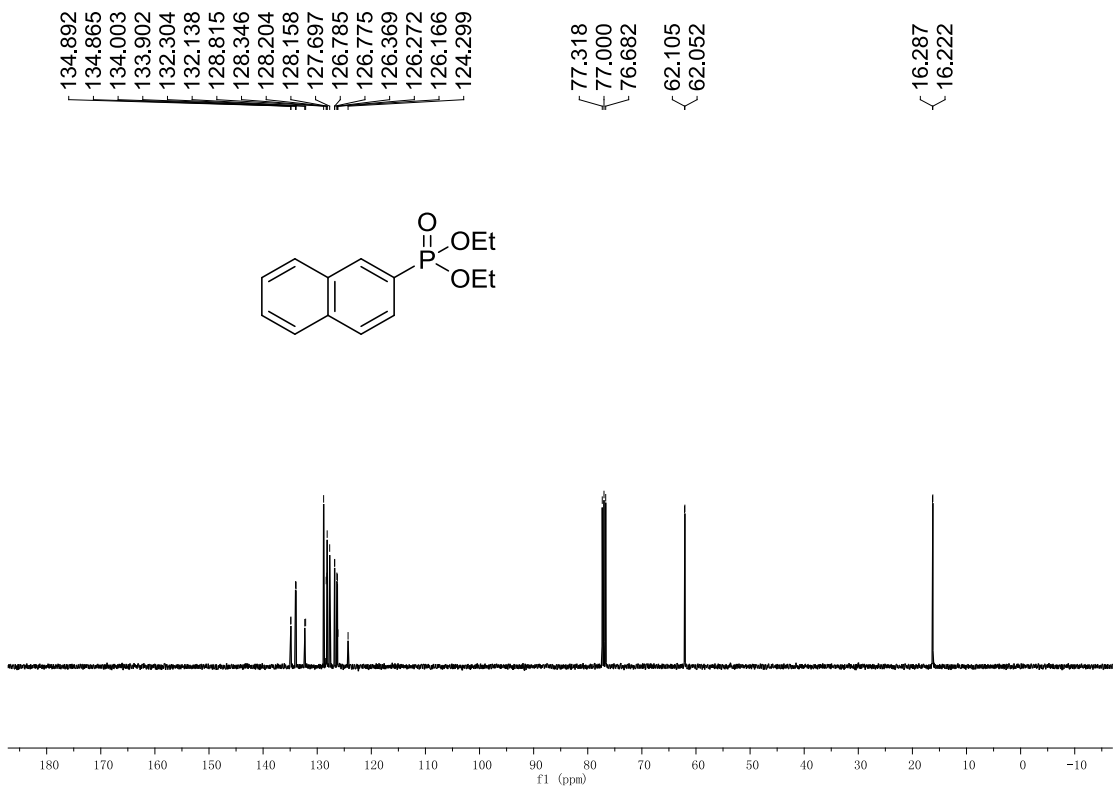

<sup>13</sup>C NMR of 3q

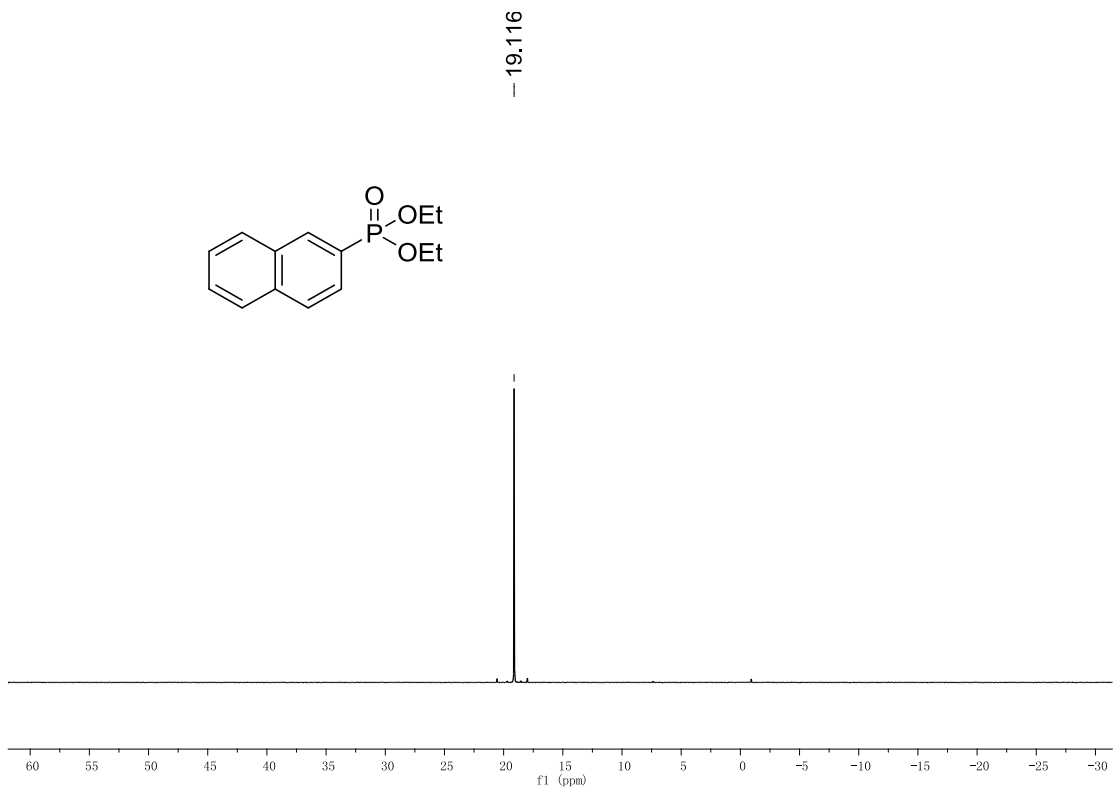

$^{31}\text{P}$  NMR of 3q

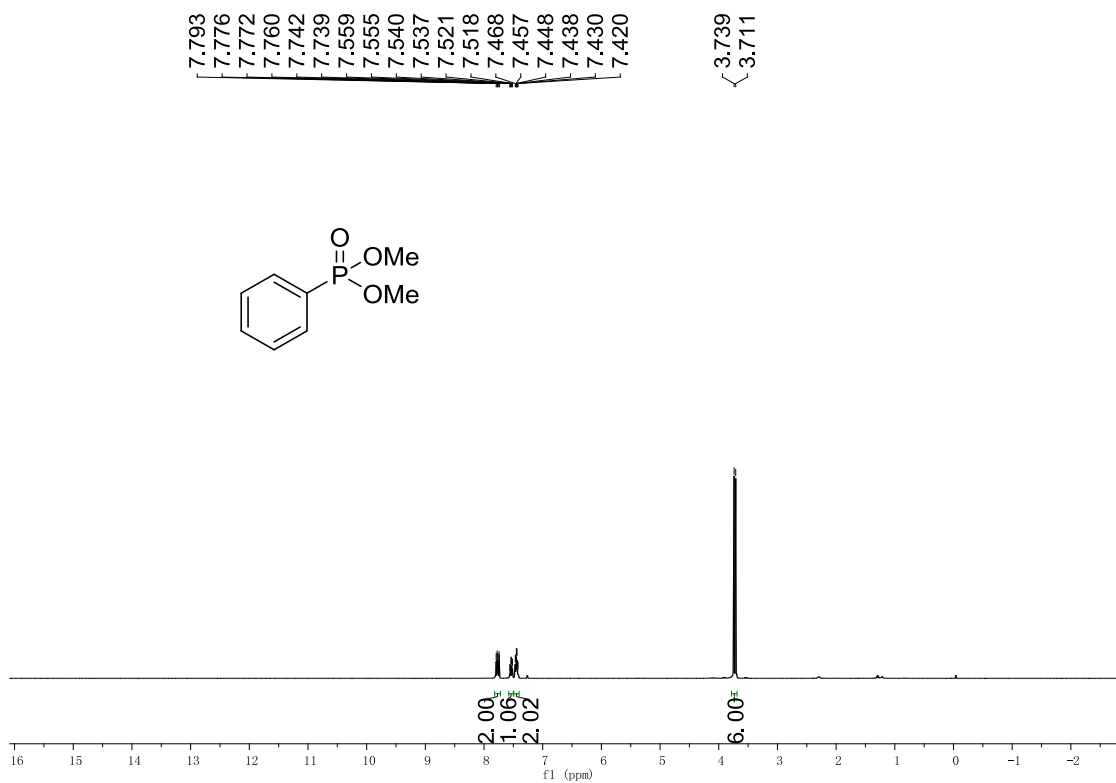

$^1\text{H}$  NMR of 4a

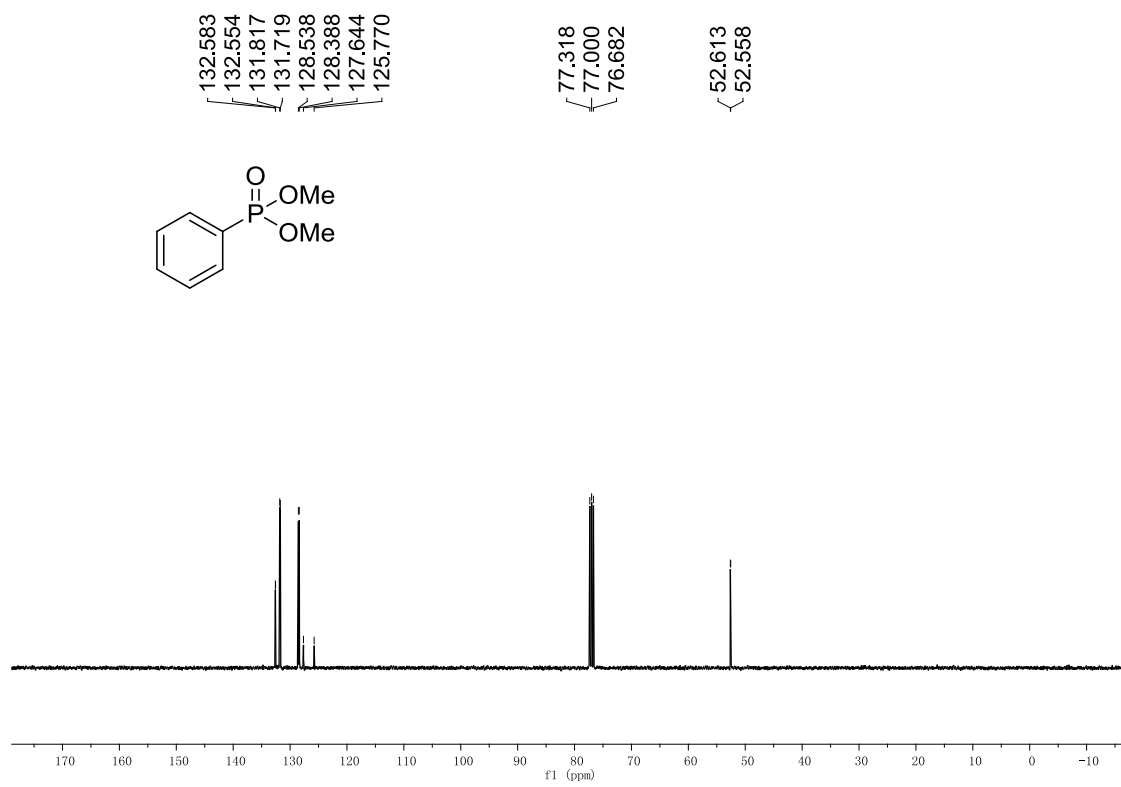

<sup>13</sup>C NMR of **4a**

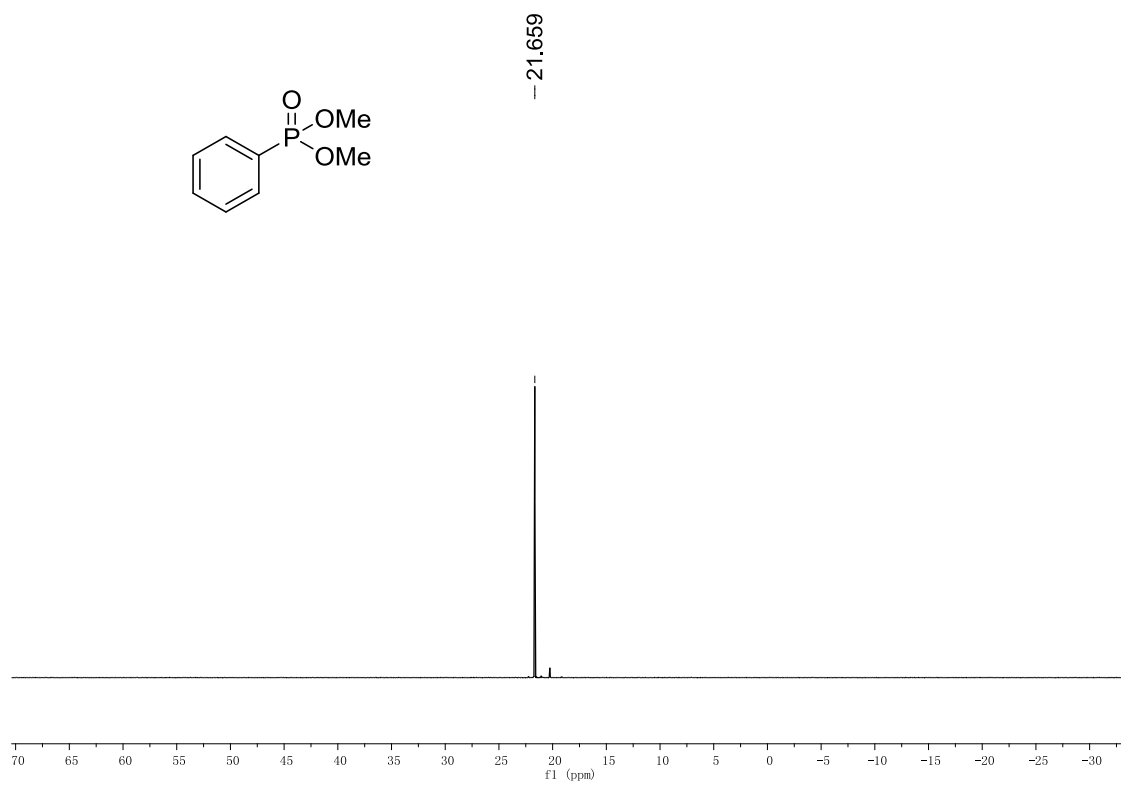

<sup>31</sup>P NMR of **4a**

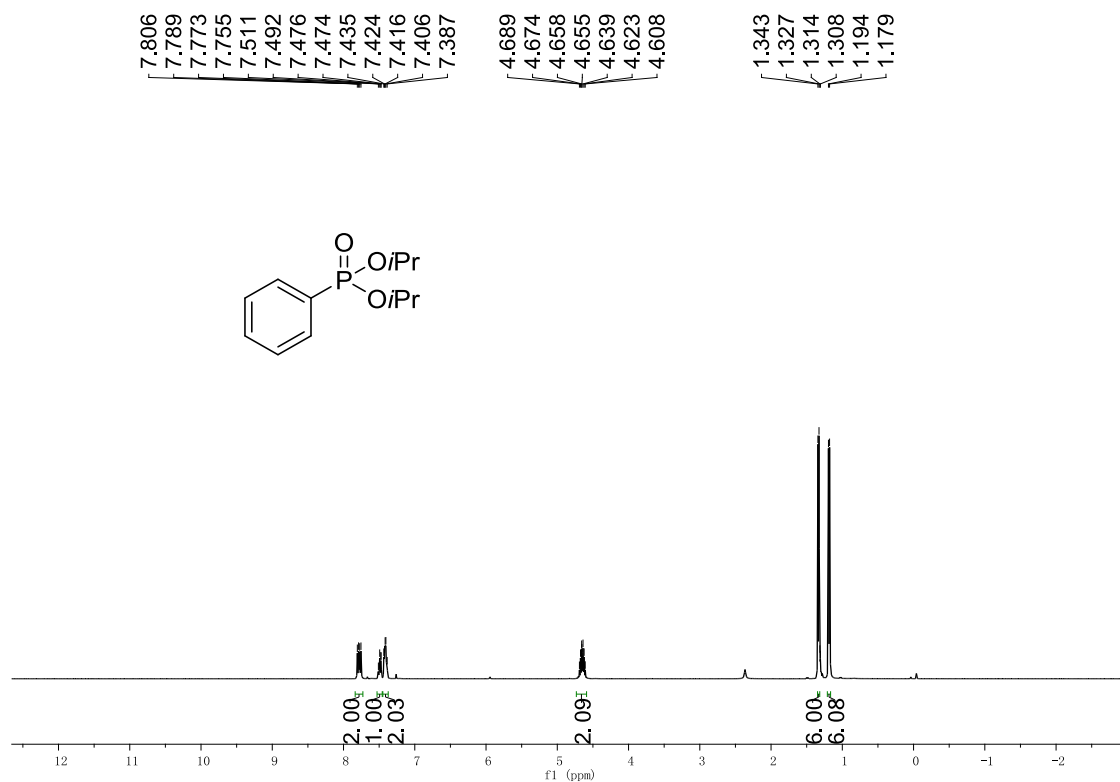

<sup>1</sup>H NMR of **4b**

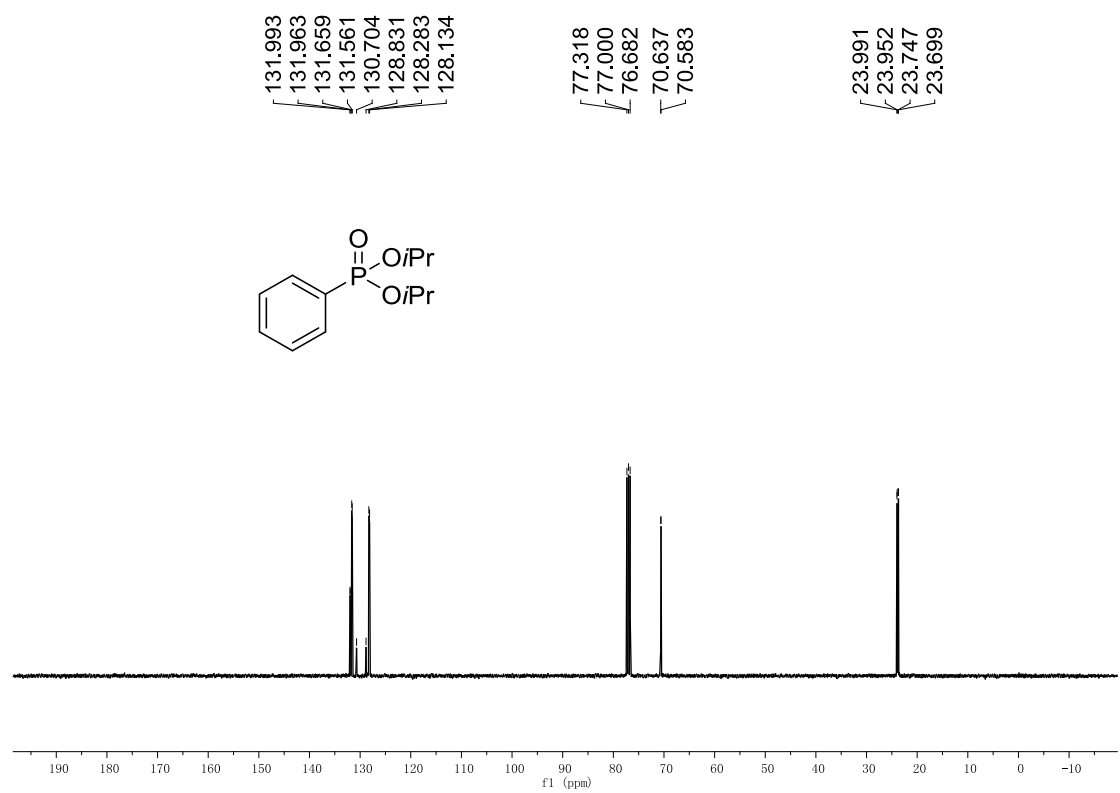

<sup>13</sup>C NMR of **4b**



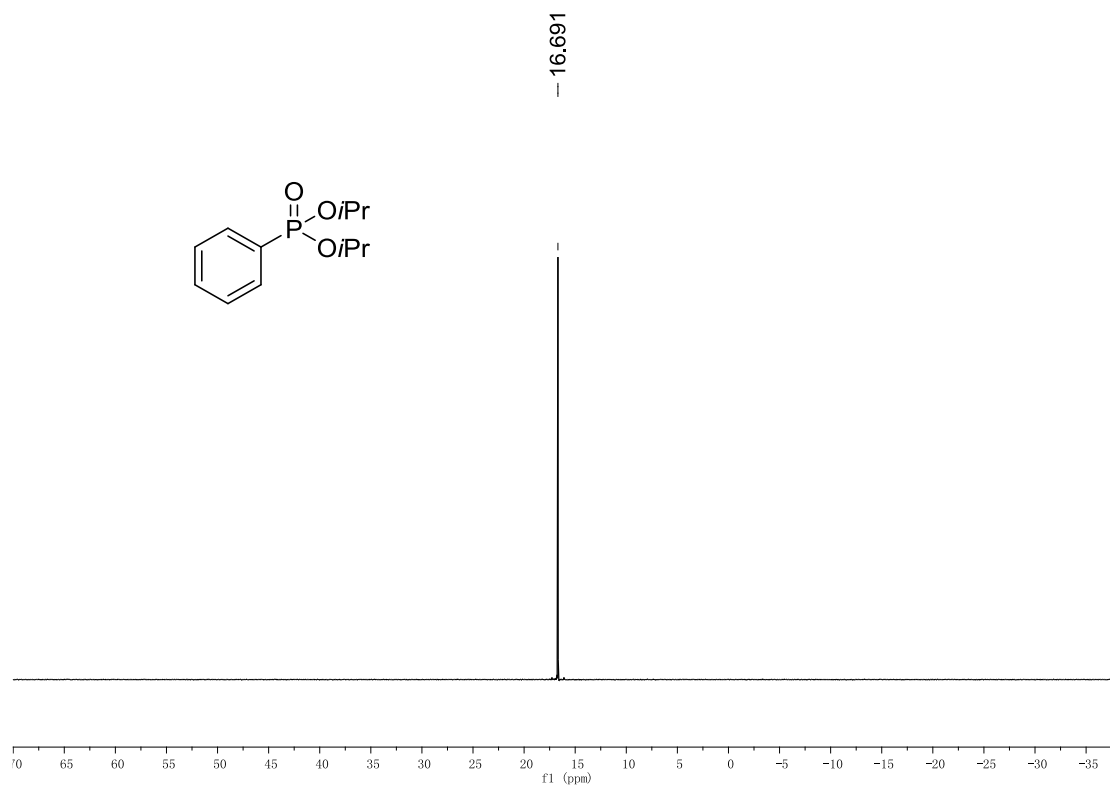

$^{31}\text{P}$  NMR of 4b

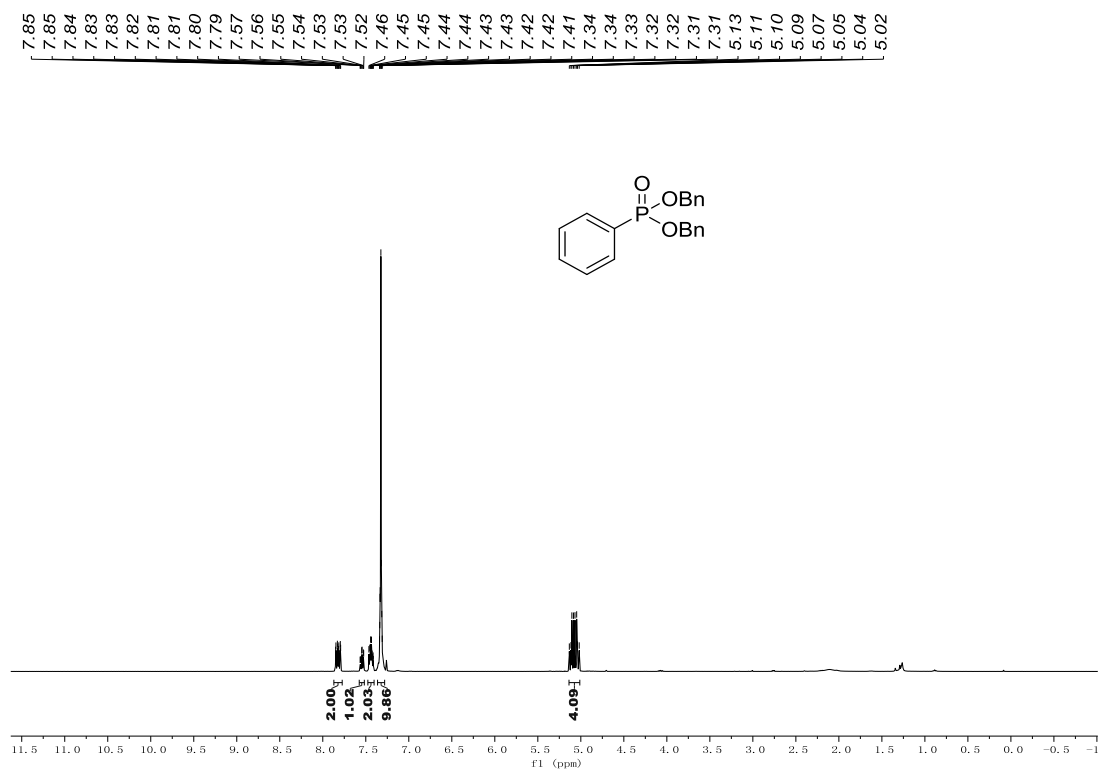

$^1\text{H}$  NMR of 4c

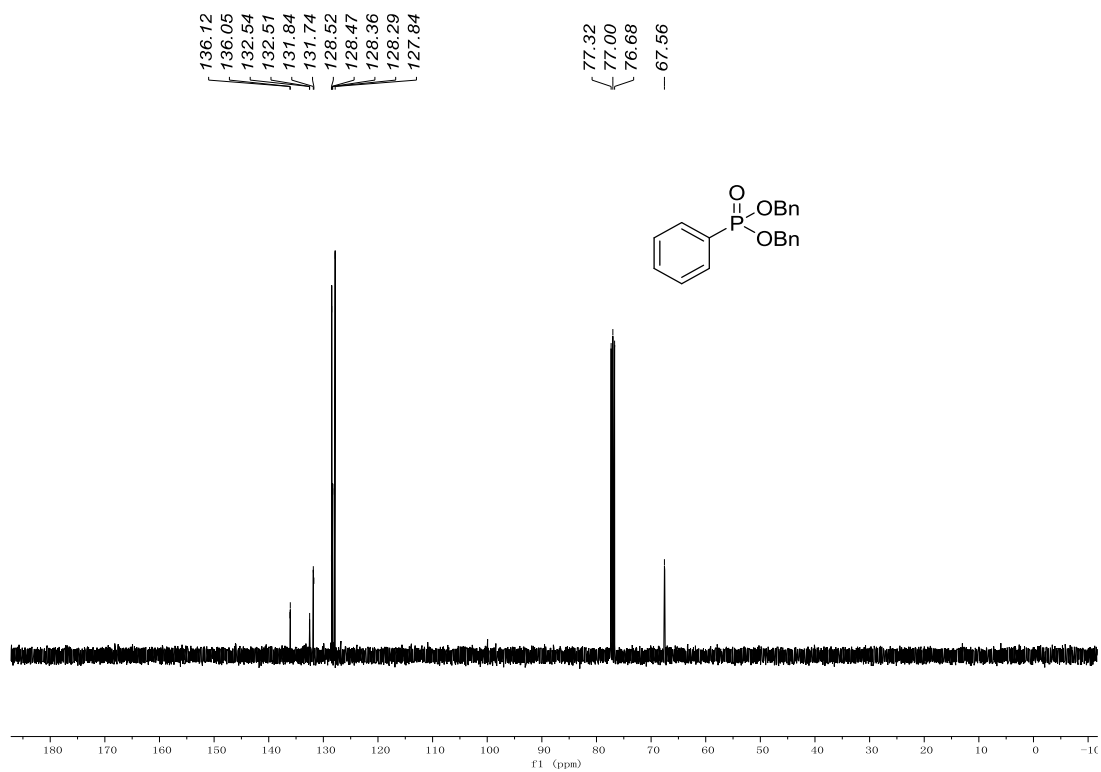

$^{13}\text{C}$  NMR of 4c

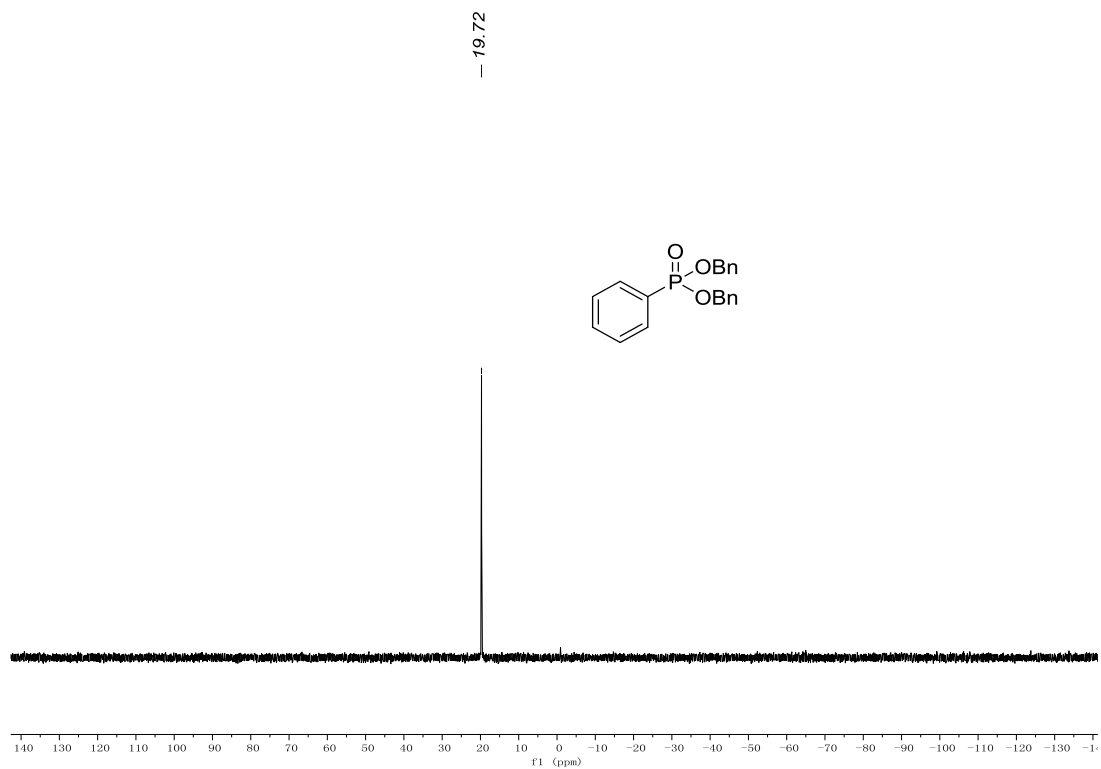

$^{31}\text{P}$  NMR of 4c

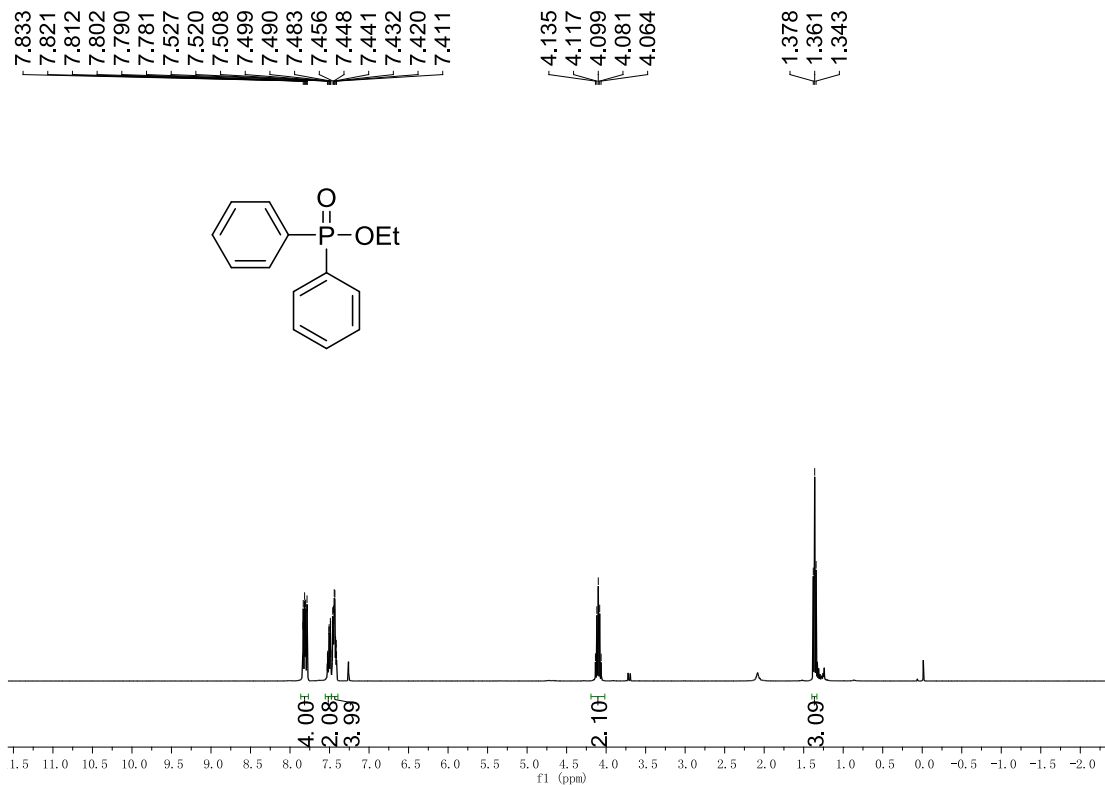

<sup>1</sup>H NMR of 4d

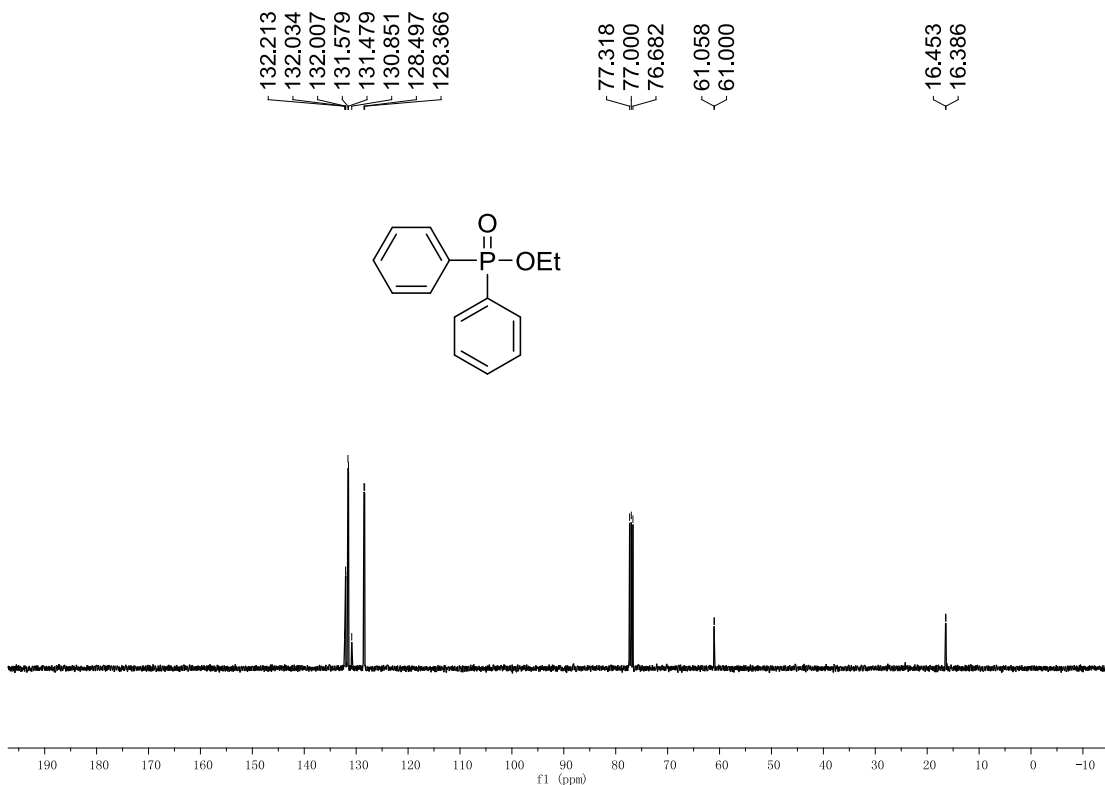

<sup>13</sup>C NMR of 4d

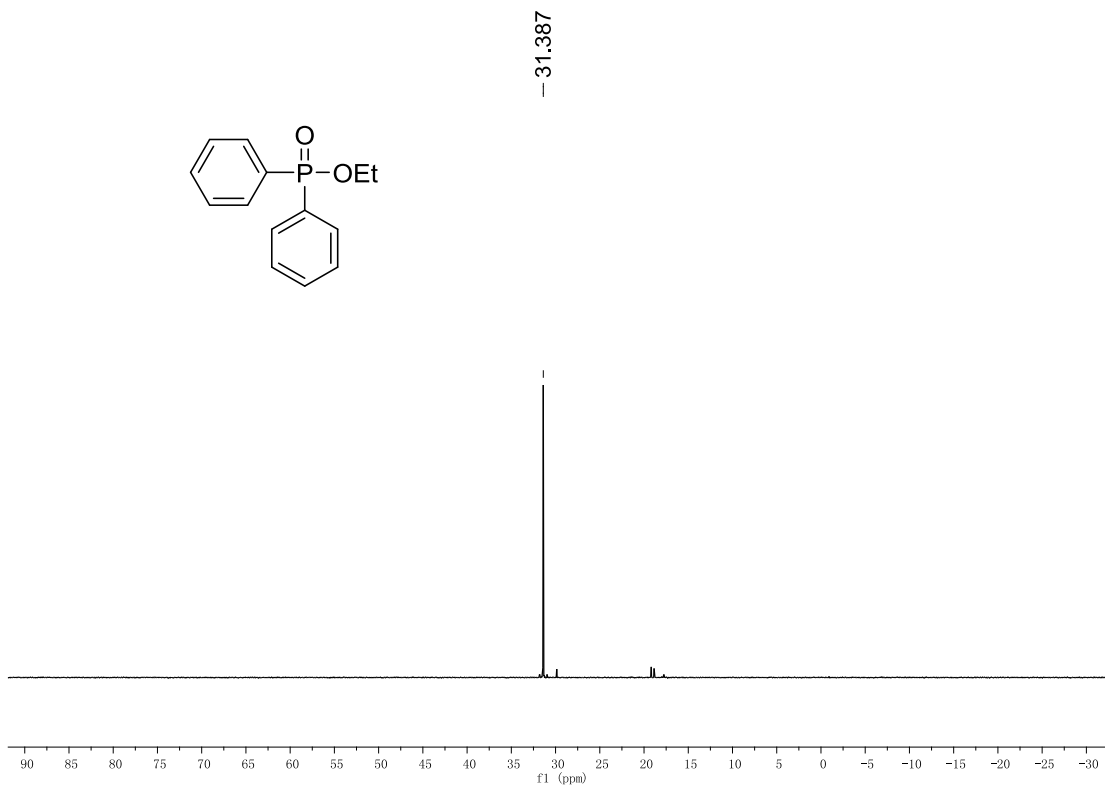

$^{31}\text{P}$  NMR of **4d**

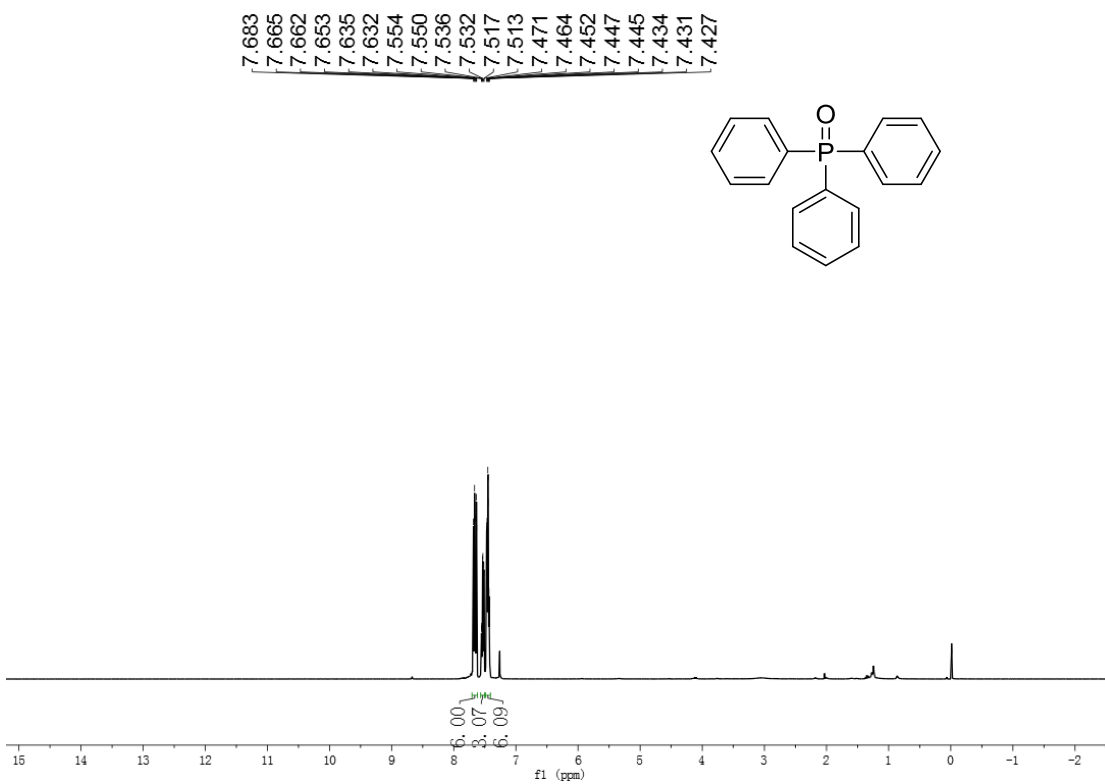

$^1\text{H}$  NMR of **4e**

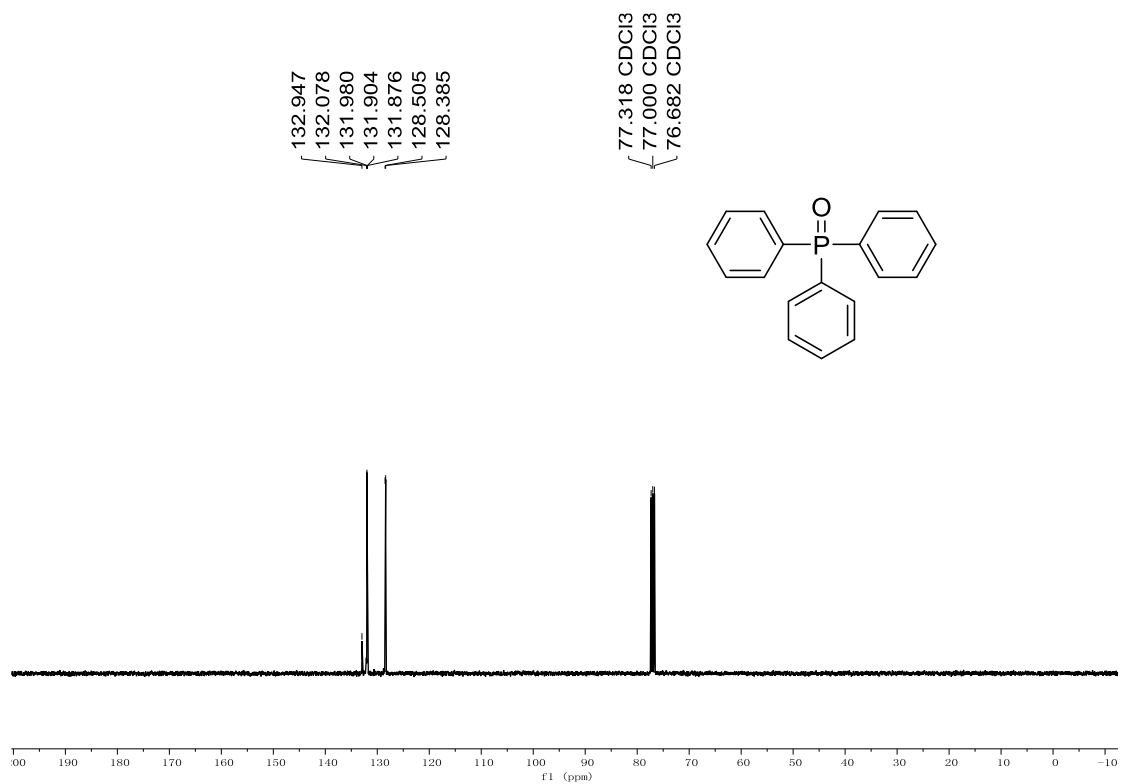

<sup>13</sup>C NMR of **4e**

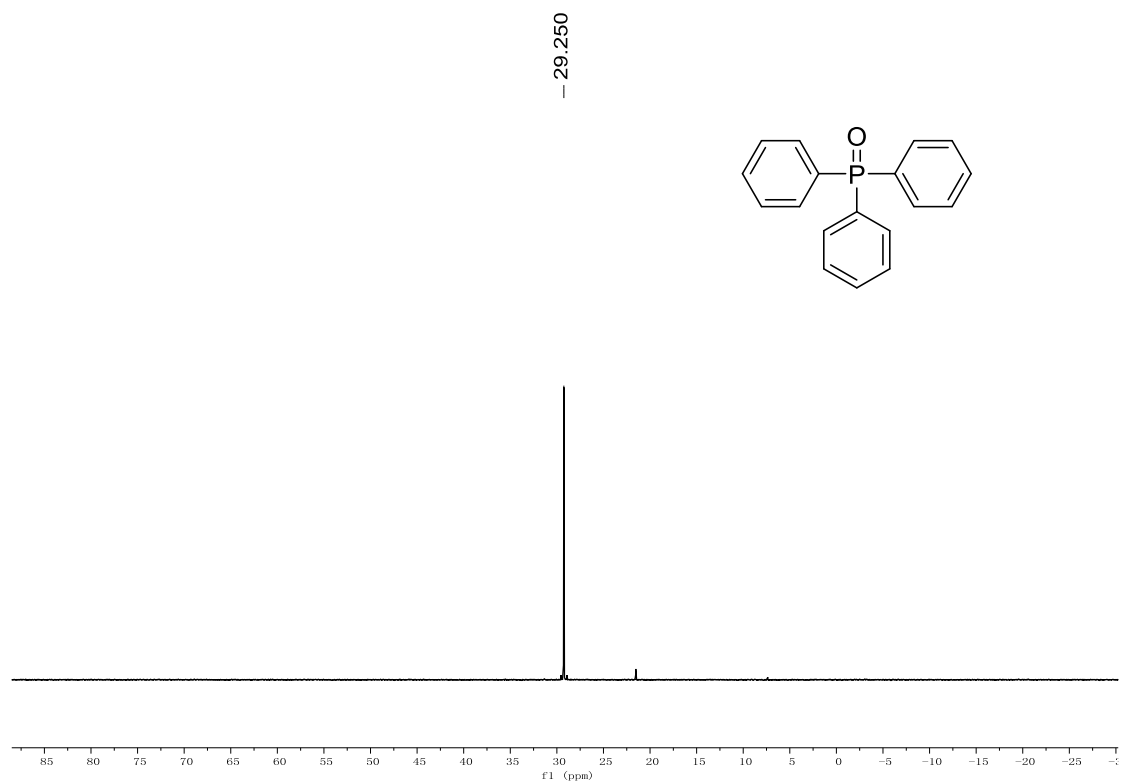

<sup>31</sup>P NMR of **4e**

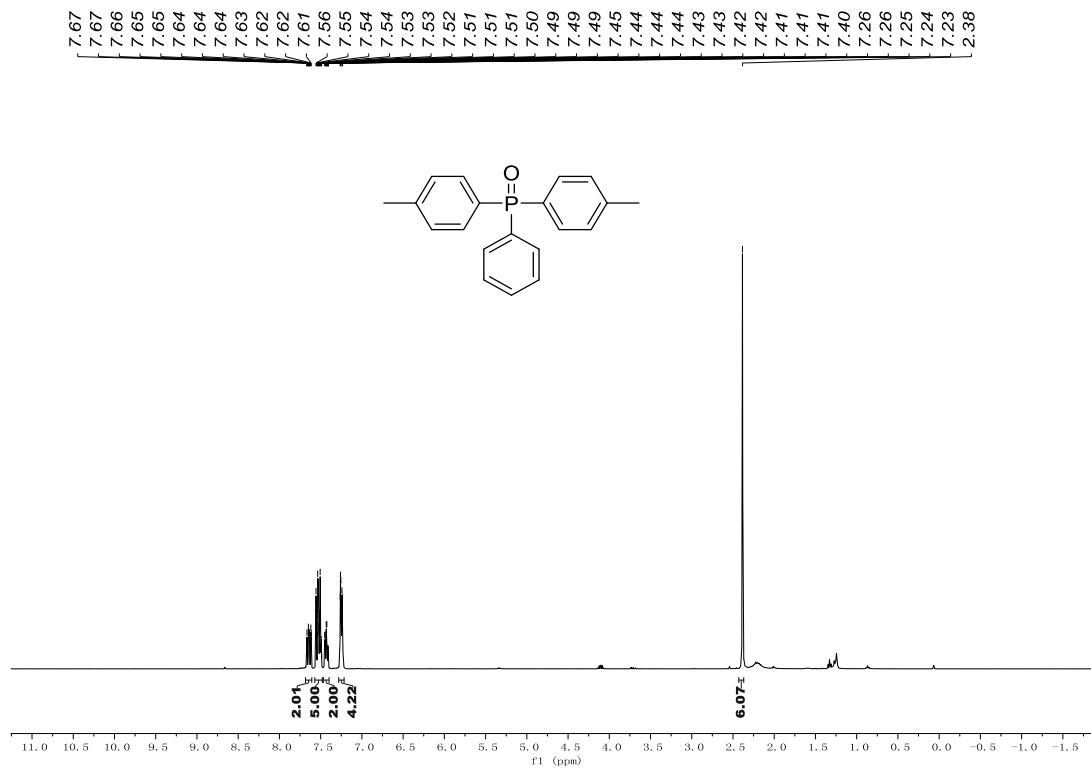

<sup>1</sup>H NMR of 4f

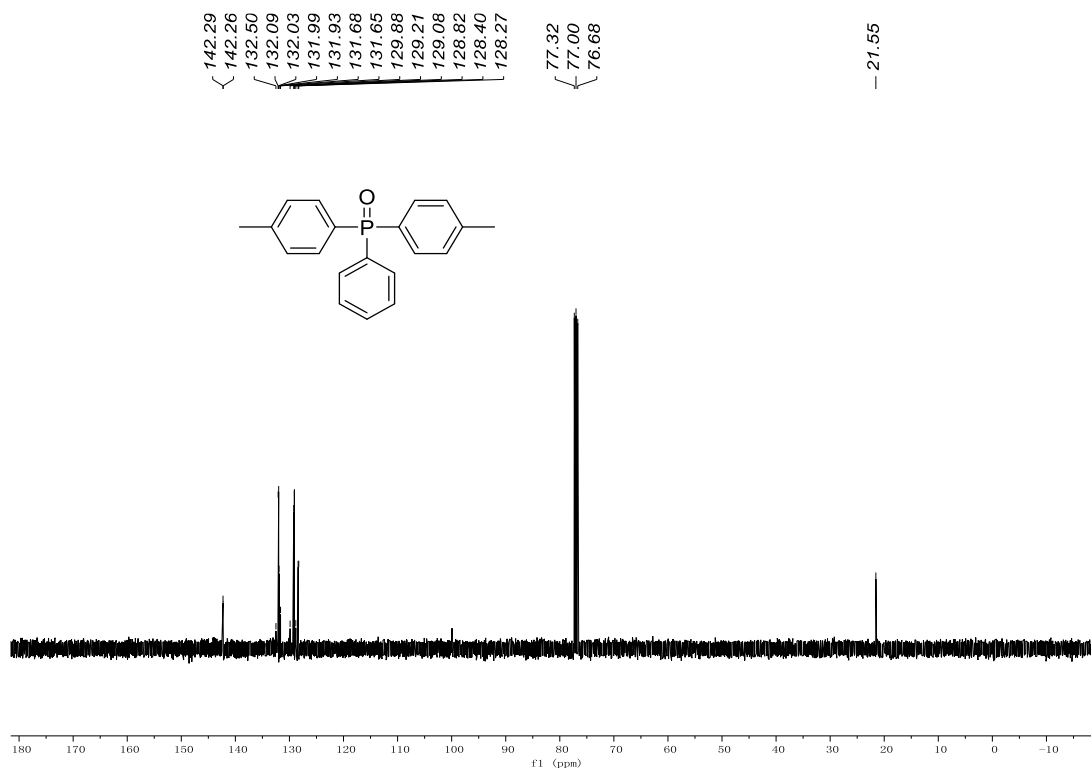

<sup>13</sup>C NMR of 4f

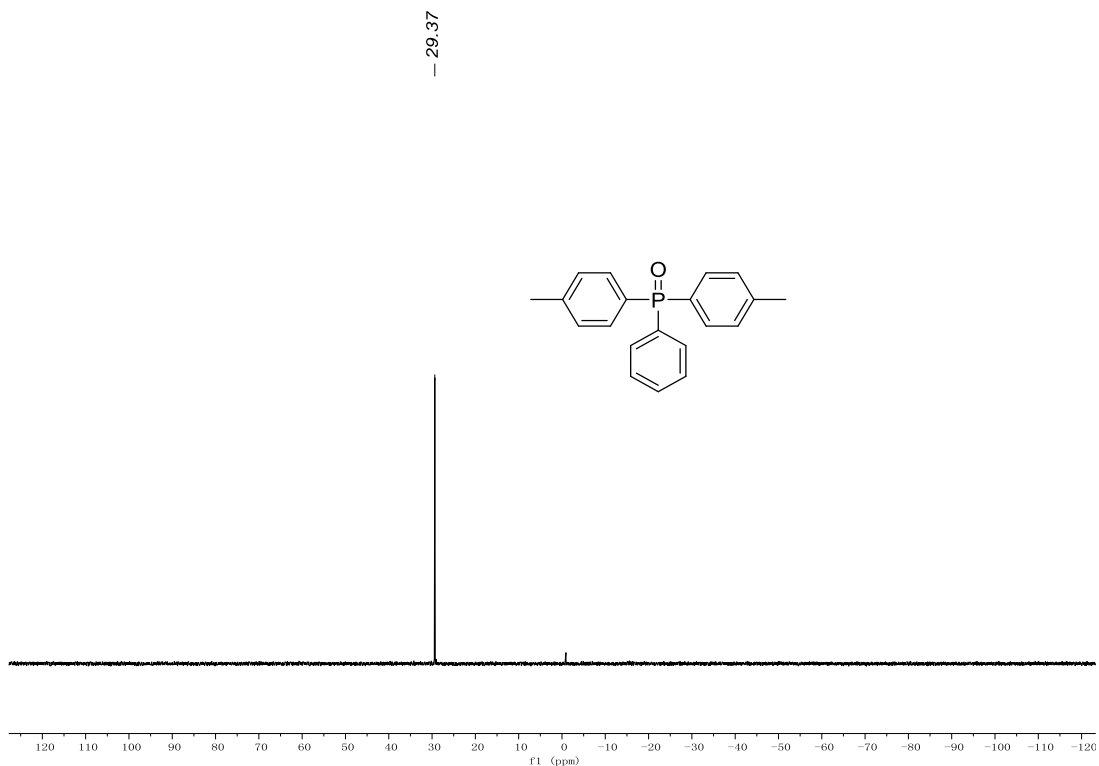

$^{31}\text{P}$  NMR of 4f

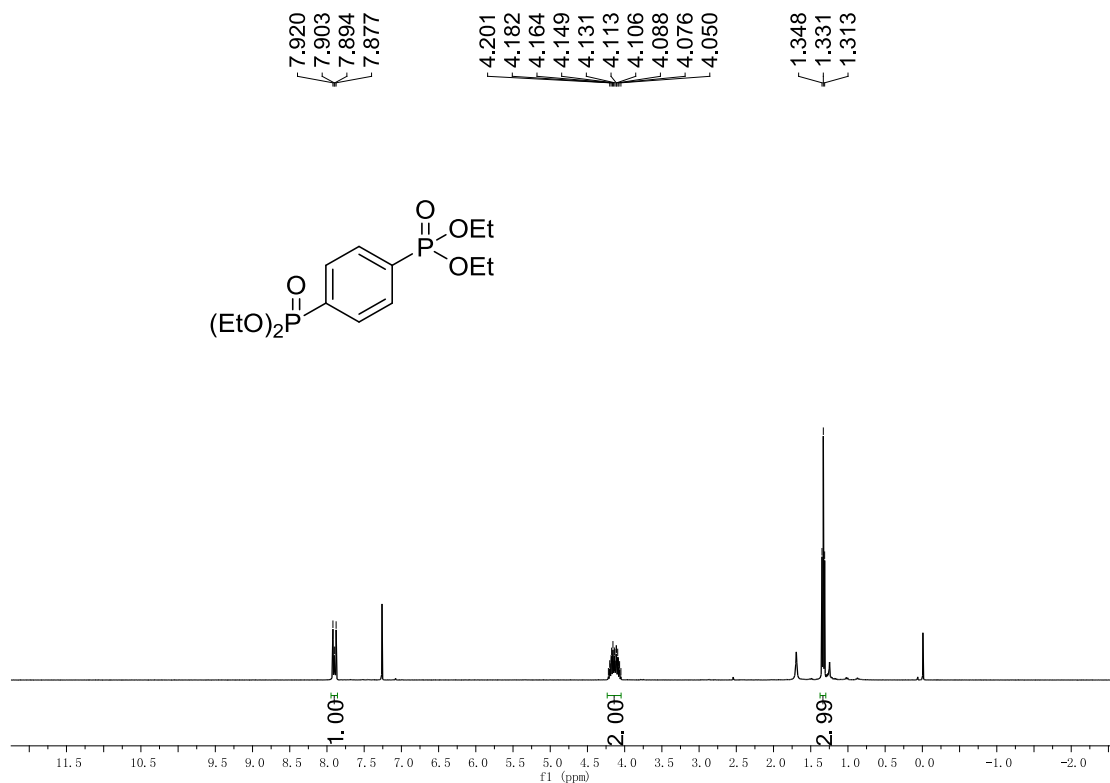

$^1\text{H}$  NMR of 5

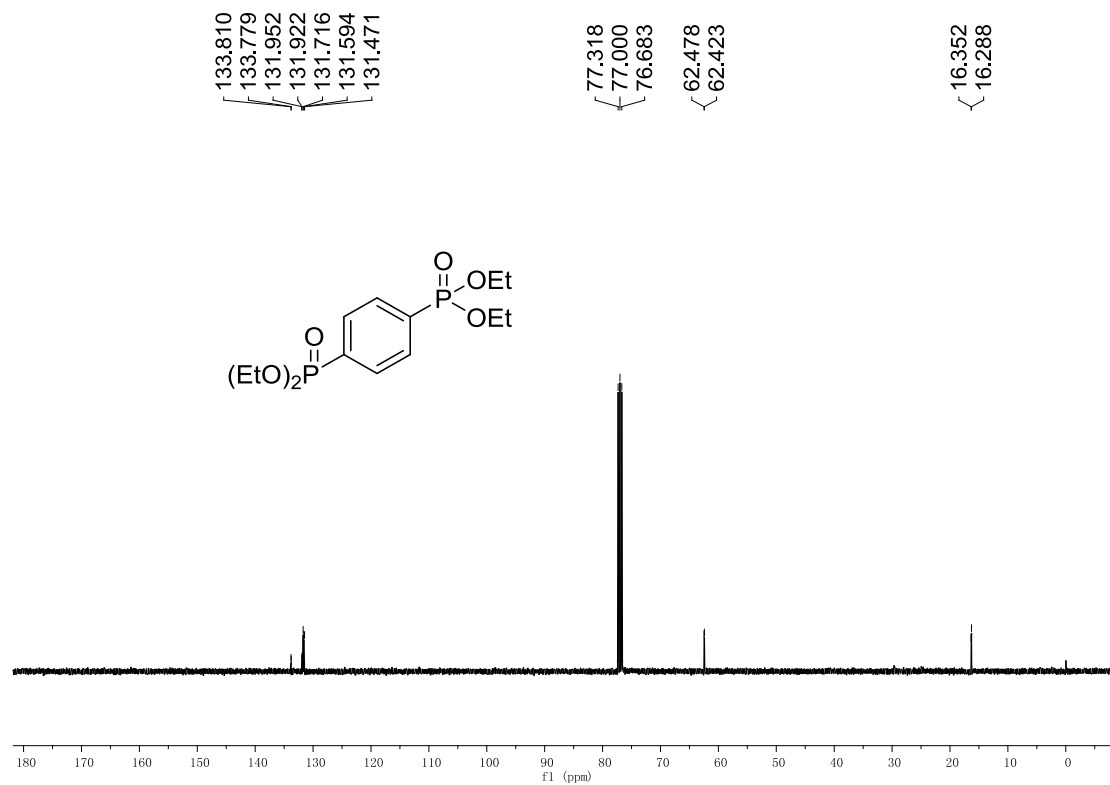

<sup>13</sup>C NMR of 5

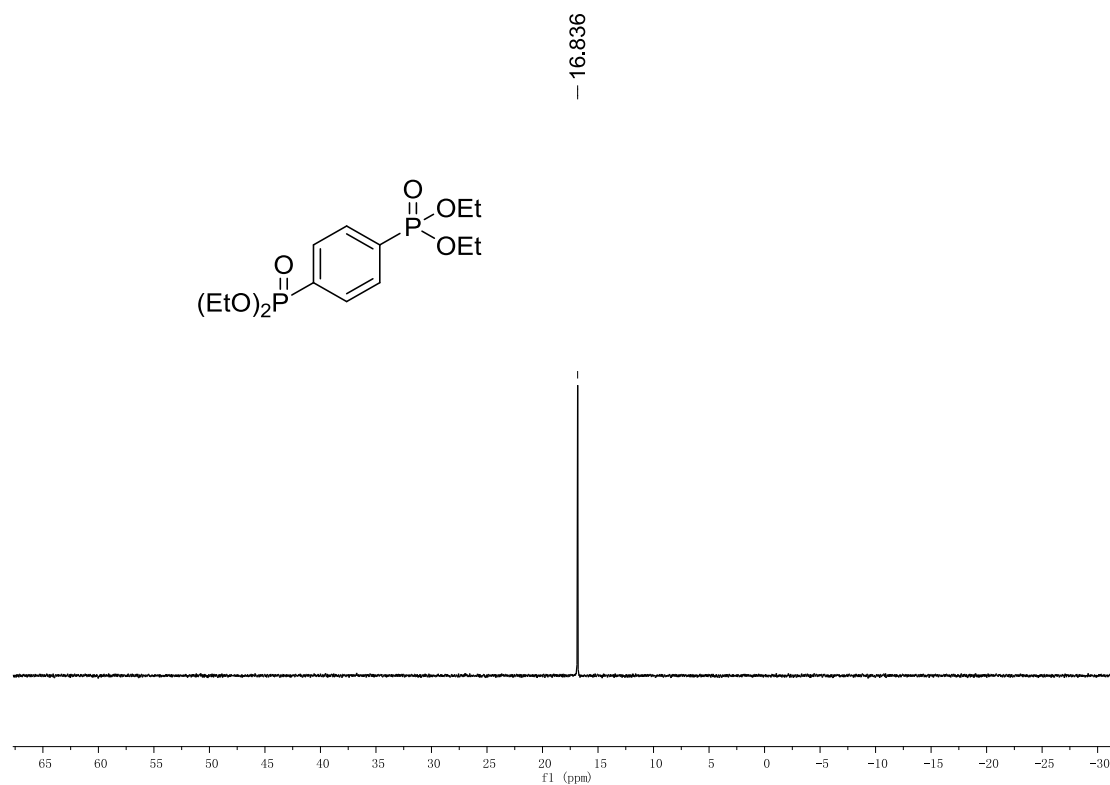

<sup>31</sup>P NMR of 5



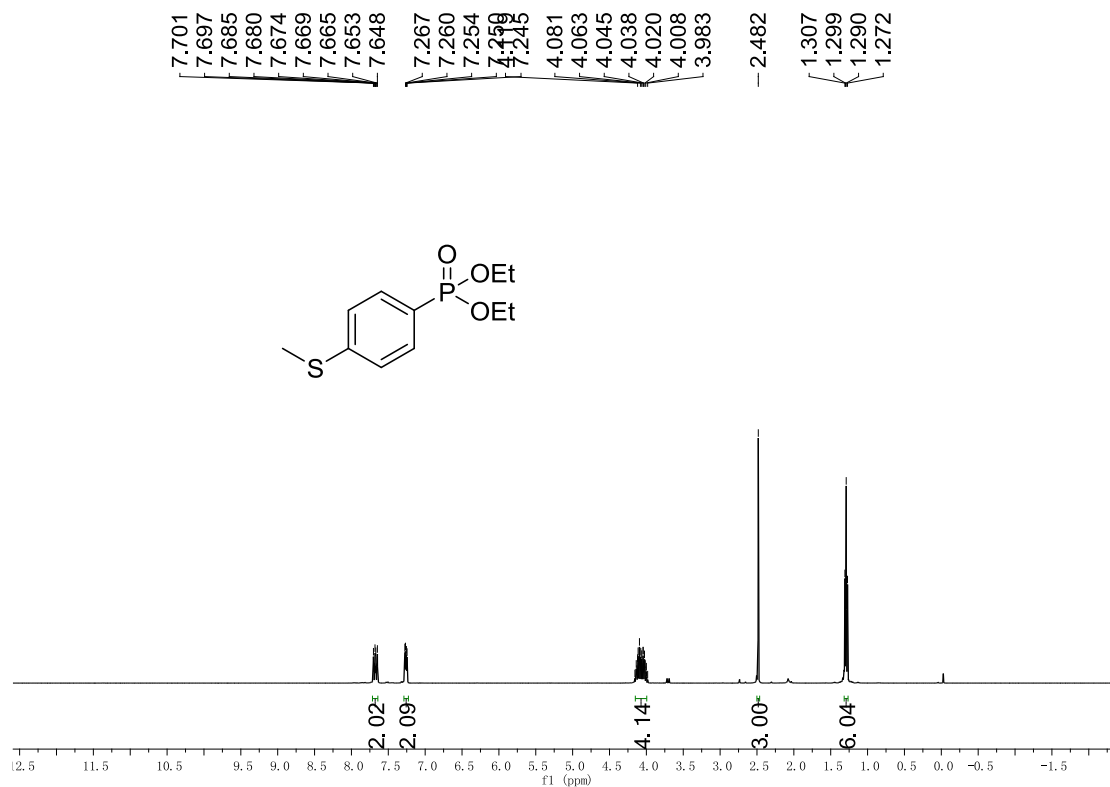

<sup>1</sup>H NMR of 6

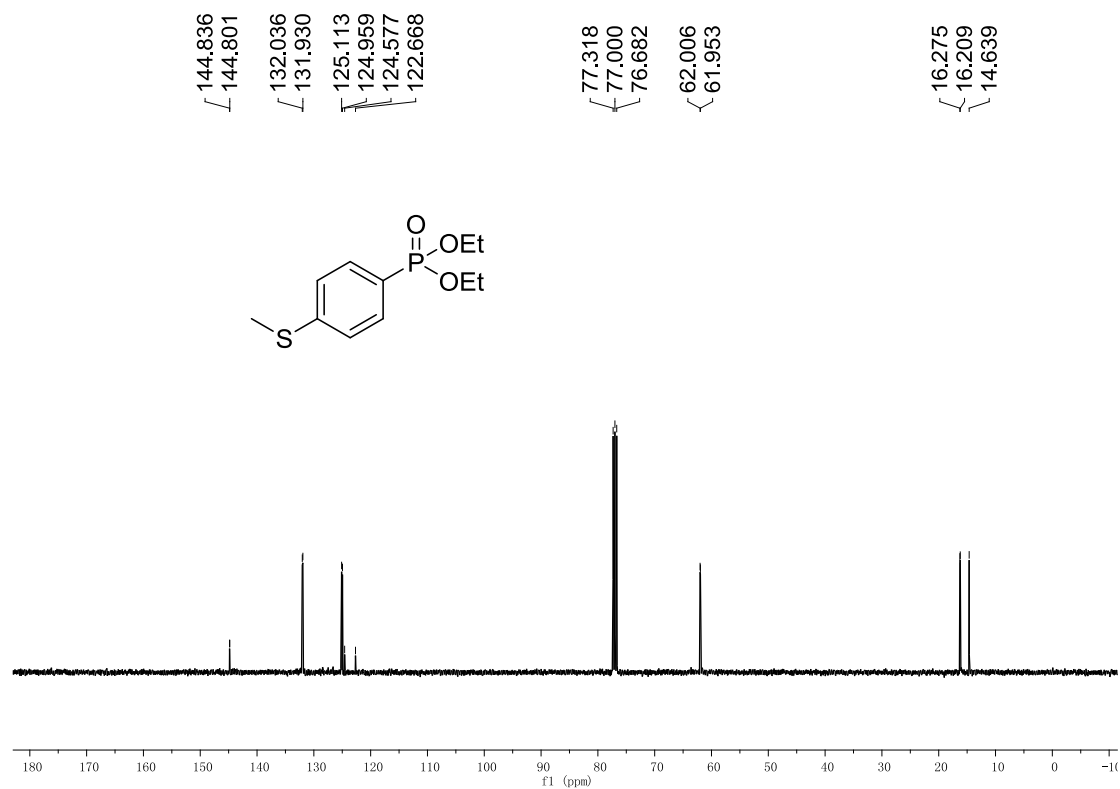

<sup>13</sup>C NMR of 6

- 19.116

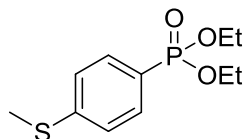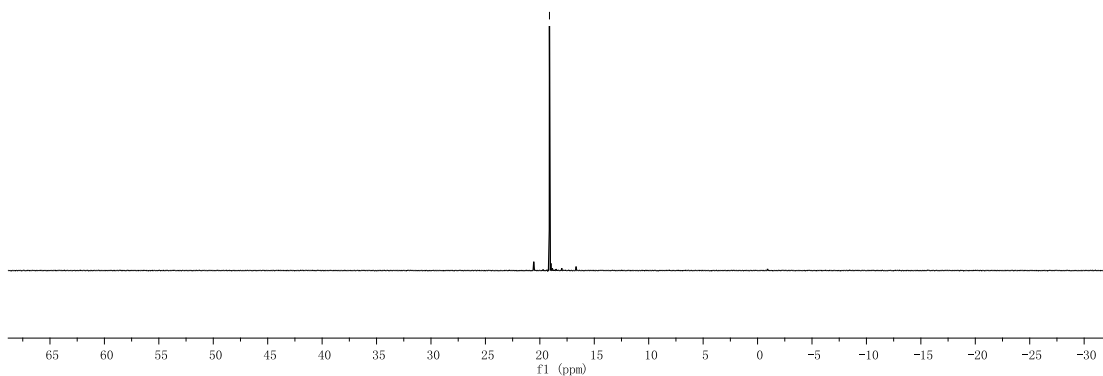

<sup>31</sup>P NMR of **6**

## 6. References.

- [1] (a) T. Yanagi, R. J. Somerville, K. Nogi, R. Martin, H. Yorimitsu, *ACS Catal.*, 2020, **10**, 2117;  
(b) Z.-Y. Tian, S.-M. Wang, S.-J. Jia, H.-X. Song, C.-P. Zhang, *Org. Lett.*, 2017, **19**, 5454.
- [2] (a) K. Miyatake, K. Yamamoto, K. Endo, E. Tsuchida, *J. Org. Chem.* 1998, **63**, 7522; (b) C. S. F. Tang, H. Rapoport, *J. Org. Chem.* 1973, **38**, 2806.
- [3] R. Zhuang, J. Xu, Z. Cai, G. Tang, M. Fang, Y. Zhao, *Org. Lett.*, 2011, **13**, 2110.
- [4] T. Miao, L. Wang, *Adv. Synth. Catal.*, 2014, **356**, 967.
- [5] L. J. Goossen, M. K. Dezfuli, *Synlett.*, 2005, 445.
- [6] C. Liu, C. L. Ji, T. Zhou, X. Hong, M. Szostak, *Org. Lett.*, 2019, **21**, 9256.
- [7] G. Hu, W. Chen, T. Fu, Z. Peng, H. Qiao, Y. Gao and Y. Zhao, *Org. Lett.*, 2013, **15**, 5362.
- [8] S. Sobhani, H. H. Moghadam, J. Skibsted, J. M. Sansano, *Green Chem.*, 2020, **22**, 1353.
